# Supplementary material for: Systematic investigation of the link between enzyme catalysis and cold adaptation
Source: PubMed Central journal article supplement (PMC8754429; doi:10.7554/elife.72884), 2022-01-12
Supplement: elife-72884-fig3-data2.pdf [file elife-72884-fig3-data2.pdf]

| Variant | T <sub>Growth</sub> <sup>a</sup> | [E]      | T <sub>Assay</sub> (°C) <sup>b</sup> | <i>k</i> <sub>cat</sub> (s <sup>-1</sup> ) <sup>c</sup> | <i>K</i> <sub>M</sub> (μM) <sup>c</sup> | <i>k</i> <sub>cat</sub> / <i>K</i> <sub>M</sub> (s <sup>-1</sup> M <sup>-1</sup> ) <sup>c</sup> |
|---------|----------------------------------|----------|--------------------------------------|---------------------------------------------------------|-----------------------------------------|-------------------------------------------------------------------------------------------------|
| bbKSI   | 34°C                             | 25-500nM | 24.7 ± 0.5                           | 1.7 ± 0.2                                               | 134 ± 54                                | (1.5 ± 0.9) × 10 <sup>4</sup>                                                                   |
| tKSI    | 29°C                             | 0.5-5nM  | 26.0 ± 1.6                           | 24.9 ± 12.2                                             | 40 ± 16                                 | (6.1 ± 1.1) × 10 <sup>5</sup>                                                                   |
| mbKSI   | 46°C                             | 5-50nM   | 25.1 ± 0.1                           | 6.9 ± 0.6                                               | 40.5 ± 12                               | (1.8 ± 0.4) × 10 <sup>5</sup>                                                                   |
| mhKSI   | 37°C                             | 10-500nM | 25.2 ± 0.2                           | 1.3 ± 0.1                                               | 92 ± 20                                 | (1.5 ± 0.2) × 10 <sup>4</sup>                                                                   |
| miKSI   | 37°C                             | 5-100nM  | 24.7 ± 0.8                           | 1.6 ± 0.5                                               | 65 ± 37                                 | (2.7 ± 0.9) × 10 <sup>4</sup>                                                                   |
| mmKSI   | 31°C                             | 0.25-5nM | 25.6 ± 1.3                           | 106.3 ± 21.0                                            | 45 ± 21                                 | (3.3 ± 2.7) × 10 <sup>6</sup>                                                                   |
| mpKSI   | 37°C                             | 10-50nM  | 25.9 ± 1.4                           | 3.4 ± 0.5                                               | 76 ± 28                                 | (4.7 ± 1.0) × 10 <sup>4</sup>                                                                   |
| msKSI   | 37°C                             | 5-50nM   | 25.0 ± 0.1                           | 29.2 ± 7.7                                              | 80 ± 12                                 | (3.7 ± 1.1) × 10 <sup>5</sup>                                                                   |
| mtKSI   | 39°C                             | 0.5-25nM | 26.0 ± 1.3                           | 44.3 ± 7.7                                              | 47 ± 4                                  | (9.6 ± 2.1) × 10 <sup>5</sup>                                                                   |
| naKSI   | 29°C                             | 10-50nM  | 27.1 ± 0.6                           | 15.9 ± 3.1                                              | 144 ± 52                                | (1.2 ± 0.2) × 10 <sup>5</sup>                                                                   |
| ntKSI   | 29°C                             | 10-100nM | 26.5 ± 1.2                           | 4.8 ± 1.1                                               | 104 ± 49                                | (5.0 ± 1.0) × 10 <sup>4</sup>                                                                   |
| npKSI   | 20°C                             | 25-250nM | 24.8 ± 0.4                           | 6.8 ± 2.0                                               | 368 ± 31                                | (1.8 ± 0.4) × 10 <sup>4</sup>                                                                   |
| oiKSI   | 29°C                             | 1-40nM   | 25.9 ± 0.9                           | 19.2 ± 7.6                                              | 107 ± 41                                | (2.6 ± 1.4) × 10 <sup>5</sup>                                                                   |
| psKSI   | 15°C                             | 50-500nM | 25.0 ± 0.0                           | 1.7 ± 0.0                                               | 411 ± 30                                | (4.1 ± 0.3) × 10 <sup>3</sup>                                                                   |
| pgKSI   | 20°C                             | 0.5-25nM | 26.3 ± 0.9                           | 18.1 ± 8.2                                              | 109 ± 86                                | (2.6 ± 2.2) × 10 <sup>5</sup>                                                                   |
| paKSI   | 34°C                             | 0.5-15nM | 26.8 ± 0.5                           | 9.4 ± 2.3                                               | 21 ± 18                                 | (7.7 ± 5.9) × 10 <sup>5</sup>                                                                   |
| pKSI    | 28°C                             | 1.5-15nM | 25.7 ± 1.1                           | 11.2 ± 3.1                                              | 25 ± 13                                 | (5.5 ± 2.7) × 10 <sup>5</sup>                                                                   |
| rmKSI   | 18°C                             | 5-50nM   | 25.0 ± 0.0                           | 10.3 ± 2.7                                              | 125 ± 13                                | (8.2 ± 1.2) × 10 <sup>4</sup>                                                                   |
| ssKSI   | 16°C                             | 5-50nM   | 24.6 ± 0.6                           | 8.7 ± 2.5                                               | 19 ± 3                                  | (4.4 ± 0.7) × 10 <sup>5</sup>                                                                   |
| spKSI   | 20°C                             | 0.5-10nM | 26.4 ± 0.4                           | 70.1 ± 21.6                                             | 77 ± 27                                 | (9.8 ± 3.4) × 10 <sup>5</sup>                                                                   |

50

51 **Figure 3—source data 2: Kinetic measurement of KSIs at 25°C with substrate 5(10)-estrene-3,17-dione.**

52 <sup>a</sup> (Engqvist, 2018)

53 <sup>b</sup> Reported assay temperatures are the average of at least three measurements per experiment.

54 <sup>c</sup> average ± standard deviation from 2–9 independent experiments with enzyme concentration varied by at least 5-fold.

55 Values measured with substrate concentrations from 9-600 μM. Value of *k*<sub>cat</sub>/*K*<sub>M</sub> are less than 10<sup>7</sup> M<sup>-1</sup> s<sup>-1</sup> and thus

56 unlikely to be limited by substrate binding. Reported assay temperatures are the average of at least 3 measurements

57 per experiment.
