# Supplementary material for: Systematic investigation of the link between enzyme catalysis and cold adaptation
Source: PubMed Central journal article supplement (PMC8754429; doi:10.7554/elife.72884), 2022-01-12
Supplement: elife-72884-fig3-data3.pdf [file elife-72884-fig3-data3.pdf]

| Variant | T <sub>Growth</sub> <sup>a</sup> | [E]       | T <sub>Assay</sub> (°C) <sup>b</sup> | k <sub>cat</sub> (s <sup>-1</sup> ) <sup>c</sup> | K <sub>M</sub> (μM) <sup>c</sup> | k <sub>cat</sub> /K <sub>M</sub> (s <sup>-1</sup> M <sup>-1</sup> ) <sup>c</sup> |
|---------|----------------------------------|-----------|--------------------------------------|--------------------------------------------------|----------------------------------|----------------------------------------------------------------------------------|
| bbKSI   | 34°C                             | 250-500nM | 14.9 ± 0.2                           | 0.27 ± 0.23                                      | 115 ± 77                         | (2.2 ± 0.6) × 10 <sup>3</sup>                                                    |
| tKSI    | 29°C                             | 5-100nM   | 15.3 ± 0.6                           | 4.9 ± 0.3                                        | 35 ± 1                           | (1.4 ± 0.1) × 10 <sup>5</sup>                                                    |
| mbKSI   | 46°C                             | 50-100nM  | 15.3 ± 0.0                           | 2.8 ± 0.2                                        | 52 ± 5                           | (5.3 ± 0.1) × 10 <sup>4</sup>                                                    |
| mhKSI   | 37°C                             | 250-500nM | 14.9 ± 0.2                           | 0.6 ± 0.3                                        | 160 ± 102                        | (3.8 ± 0.9) × 10 <sup>3</sup>                                                    |
| miKSI   | 37°C                             | 50-100nM  | 14.7 ± 0.1                           | 0.42 ± 0.05                                      | 10.6 ± 0.9                       | (4.0 ± 0.8) × 10 <sup>4</sup>                                                    |
| mmKSI   | 31°C                             | 2.5-5nM   | 15.0 ± 0.3                           | 47.1 ± 7.6                                       | 21.2 ± 7.3                       | (2.5 ± 1.1) × 10 <sup>6</sup>                                                    |
| mpKSI   | 37°C                             | 25-50nM   | 15.0 ± 0.0                           | 1.16 ± 0.02                                      | 77 ± 30                          | (1.6 ± 0.6) × 10 <sup>4</sup>                                                    |
| msKSI   | 37°C                             | 25-50nM   | 15.0 ± 0.1                           | 8.2 ± 3.2                                        | 62 ± 39                          | (1.4 ± 0.3) × 10 <sup>5</sup>                                                    |
| mtKSI   | 39°C                             | 5-15nM    | 15.2 ± 0.2                           | 14.1 ± 1.6                                       | 53 ± 29                          | (3.2 ± 2.1) × 10 <sup>5</sup>                                                    |
| naKSI   | 29°C                             | 25-50nM   | 14.9 ± 0.0                           | 6.5 ± 1.0                                        | 116 ± 16                         | (5.6 ± 0.1) × 10 <sup>4</sup>                                                    |
| ntKSI   | 29°C                             | 5-250nM   | 15.5 ± 0.6                           | 1.9 ± 0.2                                        | 120 ± 21                         | (1.6 ± 0.1) × 10 <sup>4</sup>                                                    |
| npKSI   | 20°C                             | 100-250nM | 14.9 ± 0.2                           | 3.2 ± 1.0                                        | 446 ± 116                        | (7.2 ± 0.4) × 10 <sup>3</sup>                                                    |
| oiKSI   | 29°C                             | 1-50nM    | 15.3 ± 0.4                           | 6.6 ± 0.4                                        | 73 ± 25                          | (9.9 ± 3.8) × 10 <sup>4</sup>                                                    |
| psKSI   | 15°C                             | 250-500nM | 15.3 ± 0.0                           | 0.7 ± 0.1                                        | 500 ± 62                         | (1.5 ± 0.1) × 10 <sup>3</sup>                                                    |
| pgKSI   | 20°C                             | 2.5-50nM  | 15.3 ± 0.8                           | 6.8 ± 1.5                                        | 43 ± 9                           | (1.7 ± 0.7) × 10 <sup>5</sup>                                                    |
| paKSI   | 34°C                             | 5-20nM    | 15.2 ± 0.3                           | 1.3 ± 1.1                                        | 11 ± 5                           | (1.5 ± 1.5) × 10 <sup>5</sup>                                                    |
| pKSI    | 28°C                             | 5-25nM    | 14.4 ± 1.0                           | 4.9 ± 2.1                                        | 20 ± 13                          | (3.4 ± 2.1) × 10 <sup>5</sup>                                                    |
| rmKSI   | 18°C                             | 25-50nM   | 15.4 ± 0.1                           | 4.4 ± 0.8                                        | 147 ± 28                         | (3.0 ± 0.0) × 10 <sup>4</sup>                                                    |
| ssKSI   | 16°C                             | 25-50nM   | 15.7 ± 0.2                           | 2.5 ± 0.4                                        | 10 ± 1                           | (2.6 ± 0.2) × 10 <sup>5</sup>                                                    |
| spKSI   | 20°C                             | 5-10nM    | 15.3 ± 0.3                           | 20.2 ± 11.0                                      | 42 ± 8                           | (5.1 ± 3.7) × 10 <sup>5</sup>                                                    |

58

59 **Figure 3—source data 3: Kinetic measurement of KSIs at 15°C with substrate 5(10)-estrene-3,17-dione.**

60 <sup>a</sup> (Engqvist, 2018)

61 <sup>b</sup> Reported assay temperatures are the average of at least three measurements per experiment.

62 <sup>c</sup> average ± standard deviation from 2–4 independent experiments with enzyme concentration varied by at least 2-fold.

63 Values measured with substrate concentrations from 9-600 μM.
