# Supplementary material for: Systematic investigation of the link between enzyme catalysis and cold adaptation
Source: eLife. 2022 Jan 12;11:e72884. doi: 10.7554/eLife.72884 (PMC8754429; doi:10.7554/eLife.72884)
Supplement: Figure 1—source data 1. [file elife-72884-fig1-data1.csv]

enzyme	variant	type	TN_s1	rate_ratio	KM_uM	substrate	TAssay	TGrowth	PubMedID	Ref
alpha-amylase	Pseudoalteromonas haloplanktis	psychrophile	294	3.030927835	234	pNME	25	24	11325973	D'Amico, S., Gerday, C. and Feller, G., 2001. Structural determinants of cold adaptation and stability in a large protein. Journal of Biological Chemistry, 276(28), pp.25791-25796.						cellulase is wrong, so is IDH (units)
alpha-amylase	Pig (pancreatic)	mesophile	97	3.030927835	65	pNME	25	non microbe	11325973	D'Amico, S., Gerday, C. and Feller, G., 2001. Structural determinants of cold adaptation and stability in a large protein. Journal of Biological Chemistry, 276(28), pp.25791-25796.							wrong MDH values
cellulase	Pseudoalteromonas haloplanktis	psychrophile	0.18	18	6000	pNPC	4	24	15287848	Garsoux, G., Lamotte, J., Gerday, C. and Feller, G., 2004. Kinetic and structural optimization to catalysis at low temperatures in a psychrophilic cellulase from the Antarctic bacterium Pseudoalteromonas haloplanktis. Biochemical Journal, 384(2), pp.247-253.
cellulase	Dickeya dadantii	mesophile	0.01	18	1500	pNPC	4	29	15287848	Garsoux, G., Lamotte, J., Gerday, C. and Feller, G., 2004. Kinetic and structural optimization to catalysis at low temperatures in a psychrophilic cellulase from the Antarctic bacterium Pseudoalteromonas haloplanktis. Biochemical Journal, 384(2), pp.247-253.
DNA ligase	Pseudoalteromonas haloplanktis	psychrophile	0.034	8.5	0.3	fluorescein-labelled 17me	18	24	10848966	Georlette, D., Jonsson, Z.O., Van Petegem, F., Chessa, J.P., Van Beeumen, J., Hübscher, U. and Gerday, C., 2000. A DNA ligase from the psychrophile Pseudoalteromonas haloplanktis gives insights into the adaptation of proteins to low temperatures. European journal of biochemistry, 267(12), pp.3502-3512.
DNA ligase	Escherichia coli	mesophile	0.004	8.5	0.18	fluorescein-labelled 17me	18	36	10848966	Georlette, D., Jonsson, Z.O., Van Petegem, F., Chessa, J.P., Van Beeumen, J., Hübscher, U. and Gerday, C., 2000. A DNA ligase from the psychrophile Pseudoalteromonas haloplanktis gives insights into the adaptation of proteins to low temperatures. European journal of biochemistry, 267(12), pp.3502-3512.
endonuclease I	Vibrio salmonicida	psychrophile	9.41	9.13592233	24600	DNaseAlert™ substrate	0.5	15	17222185	Altermark, B., Niiranen, L., Willassen, N.P., Smalås, A.O. and Moe, E., 2007. Comparative studies of endonuclease I from cold‐adapted Vibrio salmonicida and mesophilic Vibrio cholerae. The FEBS journal, 274(1), pp.252-263.
endonuclease I	Vibrio cholerae	mesophile	1.03	9.13592233	11800	DNaseAlert™ substrate	0.5	36	17222185	Altermark, B., Niiranen, L., Willassen, N.P., Smalås, A.O. and Moe, E., 2007. Comparative studies of endonuclease I from cold‐adapted Vibrio salmonicida and mesophilic Vibrio cholerae. The FEBS journal, 274(1), pp.252-263.
isocitrate dehydrogenase	Colwellia maris	psychrophile	70.8	3.218181818	62000	isocitrate	15	13	15817777	Watanabe, S., Yasutake, Y., Tanaka, I. and Takada, Y., 2005. Elucidation of stability determinants of cold-adapted monomeric isocitrate dehydrogenase from a psychrophilic bacterium, Colwellia maris, by construction of chimeric enzymes. Microbiology, 151(4), pp.1083-1094.
isocitrate dehydrogenase	Escherichia coli	mesophile	22	3.218181818	3300	isocitrate	15	36	15817777	Watanabe, S., Yasutake, Y., Tanaka, I. and Takada, Y., 2005. Elucidation of stability determinants of cold-adapted monomeric isocitrate dehydrogenase from a psychrophilic bacterium, Colwellia maris, by construction of chimeric enzymes. Microbiology, 151(4), pp.1083-1094.
lactate dehydrogenase	Champsocephalus gunnari	psychrophile	230	3.194444444	160	pyruvate	0	non microbe	17936781	Coquelle, N., Fioravanti, E., Weik, M., Vellieux, F. and Madern, D., 2007. Activity, stability and structural studies of lactate dehydrogenases adapted to extreme thermal environments. Journal of molecular biology, 374(2), pp.547-562.
lactate dehydrogenase	Swalus acanthias	mesophile	72	3.194444444	300	pyruvate	0	non microbe	17936781	Coquelle, N., Fioravanti, E., Weik, M., Vellieux, F. and Madern, D., 2007. Activity, stability and structural studies of lactate dehydrogenases adapted to extreme thermal environments. Journal of molecular biology, 374(2), pp.547-562.
ornithine transcarbamylase	Moritella abyssi	psychrophile	690	2.936170213	45000	ornithine	30	5	12644485	Xu, Y., Feller, G., Gerday, C. and Glansdorff, N., 2003. Metabolic enzymes from psychrophilic bacteria: challenge of adaptation to low temperatures in ornithine carbamoyltransferase from Moritella abyssi. Journal of bacteriology, 185(7), pp.2161-2168.
ornithine transcarbamylase	Saccharomyces cerevisiae	mesophile	235	2.936170213	9000	ornithine	30	28	12644485	Xu, Y., Feller, G., Gerday, C. and Glansdorff, N., 2003. Metabolic enzymes from psychrophilic bacteria: challenge of adaptation to low temperatures in ornithine carbamoyltransferase from Moritella abyssi. Journal of bacteriology, 185(7), pp.2161-2168.
subtilisin	Bacillus sp. (Antartic) TA41	psychrophile	32	1.777777778	26	suc-FAAF-pNA	5	unknown	9514115	Narinx, E., Baise, E. and Gerday, C., 1997. Subtilisin from psychrophilic antarctic bacteria: characterization and site-directed mutagenesis of residues possibly involved in the adaptation to cold. Protein engineering, 10(11), pp.1271-1279.
subtilisin	Bacillus subtilis	mesophile	18	1.777777778	6	suc-FAAF-pNA	5	30	9514115	Narinx, E., Baise, E. and Gerday, C., 1997. Subtilisin from psychrophilic antarctic bacteria: characterization and site-directed mutagenesis of residues possibly involved in the adaptation to cold. Protein engineering, 10(11), pp.1271-1279.
trypsin	Gadus morhua	psychrophile	4	2	80	amide (BzArg-NH-Np)	25	non microbe	2707266	ÁGEIRSSON, B., FOX, J.W. and BJARNASON, J.B., 1989. Purification and characterization of trypsin from the poikilotherm Gadus morhua. European journal of biochemistry, 180(1), pp.85-94.
trypsin	Bovine	mesophile	2	2	700	amide (BzArg-NH-Np)	25	non microbe	2707266	ÁGEIRSSON, B., FOX, J.W. and BJARNASON, J.B., 1989. Purification and characterization of trypsin from the poikilotherm Gadus morhua. European journal of biochemistry, 180(1), pp.85-94.
trypsin	Bovine	mesophile	0.21	4.285714286	300	BAPNA (Benzoyl-D,L-arginine p-nitroanilide)	4	non microbe	8896331	Outzen, H., Berglund, G.I., Smalås, A.O. and Willassen, N.P., 1996. Temperature and pH sensitivity of trypsins from Atlantic salmon (Salmo salar) in comparison with bovine and porcine trypsin. Comparative Biochemistry and Physiology Part B: Biochemistry and Molecular Biology, 115(1), pp.33-45.
trypsin	Salmon, anionic	psychrophile	0.9	4.285714286	37	BAPNA (Benzoyl-D,L-arginine p-nitroanilide)	4	non microbe	8896331	Outzen, H., Berglund, G.I., Smalås, A.O. and Willassen, N.P., 1996. Temperature and pH sensitivity of trypsins from Atlantic salmon (Salmo salar) in comparison with bovine and porcine trypsin. Comparative Biochemistry and Physiology Part B: Biochemistry and Molecular Biology, 115(1), pp.33-45.
trypsin	Bovine	mesophile	1.68	1.952380952	455	BAPNA (Benzoyl-D,L-arginine p-nitroanilide)	20	non microbe	1499272	Kristjánsson, M.M. and Nielsen, H.H., 1992. Purification and characterization of two chymotrypsin-like proteases from the pyloric caeca of rainbow trout (Oncorhynchus mykiss). Comparative biochemistry and physiology. B, Comparative biochemistry, 101(1-2), pp.247-253.
trypsin	Rainbow salmon	psychrophile	3.28	1.952380952	77	BAPNA (Benzoyl-D,L-arginine p-nitroanilide)	20	non microbe	1499272	Kristjánsson, M.M. and Nielsen, H.H., 1992. Purification and characterization of two chymotrypsin-like proteases from the pyloric caeca of rainbow trout (Oncorhynchus mykiss). Comparative biochemistry and physiology. B, Comparative biochemistry, 101(1-2), pp.247-253.
trypsin	Bovine	mesophile	15.7	2.687898089	59	Suc-AAPR-pNA	22	non microbe	11193291	Smalås, A.O., Leiros, H.K., Os, V. and Willassen, N.P., 2000. Cold adapted enzymes. Biotechnology annual review, 6, pp.1-57.
trypsin	Salmon, anionic	psychrophile	42.2	2.687898089	18	Suc-AAPR-pNA	22	non microbe	11193291	Smalås, A.O., Leiros, H.K., Os, V. and Willassen, N.P., 2000. Cold adapted enzymes. Biotechnology annual review, 6, pp.1-57.
trypsin	Bovine	mesophile	6.53	5.712098009	260	Suc-AAPK-pNA	22	non microbe	11193291	Smalås, A.O., Leiros, H.K., Os, V. and Willassen, N.P., 2000. Cold adapted enzymes. Biotechnology annual review, 6, pp.1-57.
trypsin	Salmon, anionic	psychrophile	37.3	5.712098009	63	Suc-AAPK-pNA	22	non microbe	11193291	Smalås, A.O., Leiros, H.K., Os, V. and Willassen, N.P., 2000. Cold adapted enzymes. Biotechnology annual review, 6, pp.1-57.
GTPase	Methanococcoides burtonii	psychrophile	0.03333333333	0.5405405405	20	GTP	40	21	12013435	Siddiqui, K., Cavicchioli, R. and Thomas, T., 2002. Thermodynamic activation properties of elongation factor 2 (EF-2) proteins from psychrotolerant and thermophilic Archaea. Extremophiles, 6(2), pp.143-150.
GTPase	Methanosarcina thermophila	thermophile	0.06166666667	0.5405405405	30	GTP	40	51	12013435	Siddiqui, K., Cavicchioli, R. and Thomas, T., 2002. Thermodynamic activation properties of elongation factor 2 (EF-2) proteins from psychrotolerant and thermophilic Archaea. Extremophiles, 6(2), pp.143-150.
xylanase	Naganishia adeliensis	psychrophile	46	2.19047619	3.8 g/l	oat spelt xylane	25	unknown	9413552	Feller, G. and Gerday, C., 1997. Psychrophilic enzymes: molecular basis of cold adaptation. Cellular and Molecular Life Sciences CMLS, 53(10), pp.830-841.
xylanase	Cryptococcus albidus	mesophile	21	2.19047619	2 g/l	oat spelt xylane	25	24	9413552	Feller, G. and Gerday, C., 1997. Psychrophilic enzymes: molecular basis of cold adaptation. Cellular and Molecular Life Sciences CMLS, 53(10), pp.830-841.
beta lactamase	Psychrobacter immobilis	psychrophile	1407	1.493630573	51	nitrocefin	30	25	9063463	Feller, G., Zekhnini, Z., Lamotte‐Brasseur, J. and Gerday, C., 1997. Enzymes from Cold‐Adapted Microorganisms—The Class C β‐lactamase from the Antarctic Psychrophile Psychrobacter Immobilis A5. European Journal of Biochemistry, 244(1), pp.186-191.
beta lactamase	Enterobacter cloacae	mesophile	942	1.493630573	65	nitrocefin	30	34	9063463	Feller, G., Zekhnini, Z., Lamotte‐Brasseur, J. and Gerday, C., 1997. Enzymes from Cold‐Adapted Microorganisms—The Class C β‐lactamase from the Antarctic Psychrophile Psychrobacter Immobilis A5. European Journal of Biochemistry, 244(1), pp.186-191.
MDH	Aquaspirillum arcticum	psychrophile	1111	1.002707581	45	NADH	37	5	10206992	Kim, S.Y., Hwang, K.Y., Kim, S.H., Sung, H.C., Han, Y.S. and Cho, Y., 1999. Structural basis for cold adaptation: sequence, biochemical properties, and crystal structure of malate dehydrogenase from a psychrophile Aquaspirillium arcticum. Journal of Biological Chemistry, 274(17), pp.11761-11767.
MDH	Escherichia coli	mesophile	1108	1.002707581	56	NADH	37	36	10206992	Kim, S.Y., Hwang, K.Y., Kim, S.H., Sung, H.C., Han, Y.S. and Cho, Y., 1999. Structural basis for cold adaptation: sequence, biochemical properties, and crystal structure of malate dehydrogenase from a psychrophile Aquaspirillium arcticum. Journal of Biological Chemistry, 274(17), pp.11761-11767.
MDH	Thermus flavus	thermophile	419	1.002707581	14	NADH	37	70	10206992	Kim, S.Y., Hwang, K.Y., Kim, S.H., Sung, H.C., Han, Y.S. and Cho, Y., 1999. Structural basis for cold adaptation: sequence, biochemical properties, and crystal structure of malate dehydrogenase from a psychrophile Aquaspirillium arcticum. Journal of Biological Chemistry, 274(17), pp.11761-11767.
chitobiase	Arthrobacter sp. TAD20	psychrophile	98	5.444444444	0.027	NPAG	15	unknown	11428890	Lonhienne, T., Zoidakis, J., Vorgias, C.E., Feller, G., Gerday, C. and Bouriotis, V., 2001. Modular structure, local flexibility and cold-activity of a novel chitobiase from a psychrophilic Antarctic bacterium. Journal of molecular biology, 310(2), pp.291-297.
chitobiase	Serratia marcescens	mesophile	18	5.444444444	0.038	NPAG	15	unknown	11428890	Lonhienne, T., Zoidakis, J., Vorgias, C.E., Feller, G., Gerday, C. and Bouriotis, V., 2001. Modular structure, local flexibility and cold-activity of a novel chitobiase from a psychrophilic Antarctic bacterium. Journal of molecular biology, 310(2), pp.291-297.
chitanase	Arthrobacter sp. TAD20	psychrophile	1.7	0.4340425532	NA	chitin	15	unknown	11342059	Lonhienne, T., Baise, E., Feller, G., Bouriotis, V. and Gerday, C., 2001. Enzyme activity determination on macromolecular substrates by isothermal titration calorimetry: application to mesophilic and psychrophilic chitinases. Biochimica et Biophysica Acta (BBA)-Protein Structure and Molecular Enzymology, 1545(1-2), pp.349-356.
chitanase	Serratia marcescens	mesophile	3.916666667	0.4340425532	NA	chitin	15	unknown	11342059	Lonhienne, T., Baise, E., Feller, G., Bouriotis, V. and Gerday, C., 2001. Enzyme activity determination on macromolecular substrates by isothermal titration calorimetry: application to mesophilic and psychrophilic chitinases. Biochimica et Biophysica Acta (BBA)-Protein Structure and Molecular Enzymology, 1545(1-2), pp.349-356.
alcohol dehydrogenase	Horse	mesophile	0.56	4.553571429	370	ethanol	6	non microbe	9660191	Tsigos, I., Velonia, K., Smonou, I. and Bouriotis, V., 1998. Purification and characterization of an alcohol dehydrogenase from the Antarctic psychrophile Moraxella sp. TAE123. European journal of biochemistry, 254(2), pp.356-362.
alcohol dehydrogenase	Moraxella sp. TAE123	psychrophile	2.55	4.553571429	30	ethanol	6	unknown	9660191	Tsigos, I., Velonia, K., Smonou, I. and Bouriotis, V., 1998. Purification and characterization of an alcohol dehydrogenase from the Antarctic psychrophile Moraxella sp. TAE123. European journal of biochemistry, 254(2), pp.356-362.
alkaline phosphatase	Calf	mesophile	1.28	2.6171875	1100	pNF-p	5	non microbe	NA	Ásgeirsson, B., Hartemink, R. and Chlebowski, J.F., 1995. Alkaline phosphatase from Atlantic cod (Gadus morhua). Kinetic and structural properties which indicate adaptation to low temperatures. Comparative Biochemistry and Physiology Part B: Biochemistry and Molecular Biology, 110(2), pp.315-329.
alkaline phosphatase	Cod	psychrophile	3.35	2.6171875	1070	pNF-p	5	non microbe	NA	Ásgeirsson, B., Hartemink, R. and Chlebowski, J.F., 1995. Alkaline phosphatase from Atlantic cod (Gadus morhua). Kinetic and structural properties which indicate adaptation to low temperatures. Comparative Biochemistry and Physiology Part B: Biochemistry and Molecular Biology, 110(2), pp.315-329.
elastase	Porcine	mesophile	2.94	0.08503401361	1050	Suc-AAPL-pNA	22	non microbe	9628006	Berglund, G.I., Smalås, A.O., Outzen, H. and Willassen, N.P., 1998. Purification and characterization of pancreatic elastase from North Atlantic salmon (Salmo salar). Molecular marine biology and biotechnology, 7(2), pp.105-114.
elastase	Salmon	psychrophile	0.25	0.08503401361	1340	Suc-AAPL-pNA	22	non microbe	9628006	Berglund, G.I., Smalås, A.O., Outzen, H. and Willassen, N.P., 1998. Purification and characterization of pancreatic elastase from North Atlantic salmon (Salmo salar). Molecular marine biology and biotechnology, 7(2), pp.105-114.
elastase	Porcine	mesophile	0.99	6.080808081	1420	Suc-AAPV-pNA	22	non microbe	9628006	Berglund, G.I., Smalås, A.O., Outzen, H. and Willassen, N.P., 1998. Purification and characterization of pancreatic elastase from North Atlantic salmon (Salmo salar). Molecular marine biology and biotechnology, 7(2), pp.105-114.
elastase	Salmon	psychrophile	6.02	6.080808081	820	Suc-AAPV-pNA	22	non microbe	9628006	Berglund, G.I., Smalås, A.O., Outzen, H. and Willassen, N.P., 1998. Purification and characterization of pancreatic elastase from North Atlantic salmon (Salmo salar). Molecular marine biology and biotechnology, 7(2), pp.105-114.
elastase	Porcine	mesophile	6.97	3.543758967	310	Suc-AAPA-pNA	22	non microbe	9628006	Berglund, G.I., Smalås, A.O., Outzen, H. and Willassen, N.P., 1998. Purification and characterization of pancreatic elastase from North Atlantic salmon (Salmo salar). Molecular marine biology and biotechnology, 7(2), pp.105-114.
elastase	Salmon	psychrophile	24.7	3.543758967	830	Suc-AAPA-pNA	22	non microbe	9628006	Berglund, G.I., Smalås, A.O., Outzen, H. and Willassen, N.P., 1998. Purification and characterization of pancreatic elastase from North Atlantic salmon (Salmo salar). Molecular marine biology and biotechnology, 7(2), pp.105-114.
elastase	Porcine	mesophile	0.11	83.63636364	830	Suc-AAPI-pNA	22	non microbe	9628006	Berglund, G.I., Smalås, A.O., Outzen, H. and Willassen, N.P., 1998. Purification and characterization of pancreatic elastase from North Atlantic salmon (Salmo salar). Molecular marine biology and biotechnology, 7(2), pp.105-114.
elastase	Salmon	psychrophile	9.2	83.63636364	150	Suc-AAPI-pNA	22	non microbe	9628006	Berglund, G.I., Smalås, A.O., Outzen, H. and Willassen, N.P., 1998. Purification and characterization of pancreatic elastase from North Atlantic salmon (Salmo salar). Molecular marine biology and biotechnology, 7(2), pp.105-114.
elastase	Porcine	mesophile	11.6	2.120689655	720	Suc-AAA-pNA	10	non microbe	8518301	Ásgeirsson, B. and Bjarnason, J.B., 1993. Properties of elastase from Atlantic cod a cold-adapted proteinase. Biochimica et Biophysica Acta (BBA)-Protein Structure and Molecular Enzymology, 1164(1), pp.91-100.
elastase	Cod	psychrophile	24.6	2.120689655	790	Suc-AAA-pNA	10	non microbe	8518301	Ásgeirsson, B. and Bjarnason, J.B., 1993. Properties of elastase from Atlantic cod a cold-adapted proteinase. Biochimica et Biophysica Acta (BBA)-Protein Structure and Molecular Enzymology, 1164(1), pp.91-100.
chymotrypsin	Bovine	mesophile	0.85	2.964705882	53	Suc-AAPF-NA	4	non microbe	1499272	Kristjánsson, M.M. and Nielsen, H.H., 1992. Purification and characterization of two chymotrypsin-like proteases from the pyloric caeca of rainbow trout (Oncorhynchus mykiss). Comparative biochemistry and physiology. B, Comparative biochemistry, 101(1-2), pp.247-253.
chymotrypsin	Trout II	psychrophile	2.52	2.964705882	23	Suc-AAPF-NA	4	non microbe	1499272	Kristjánsson, M.M. and Nielsen, H.H., 1992. Purification and characterization of two chymotrypsin-like proteases from the pyloric caeca of rainbow trout (Oncorhynchus mykiss). Comparative biochemistry and physiology. B, Comparative biochemistry, 101(1-2), pp.247-253.
chymotrypsin	Bovine	mesophile	0.05	2	110	Bz-Tyr-NH-Np	10	non microbe	1764912	Asgeirsson, B. and Bjarnason, J.N.B., 1991. Structural and kinetic properties of chymotrypsin from Atlantic cod (Gadus morhua). Comparison with bovine chymotrypsin. Comparative biochemistry and physiology. B, Comparative biochemistry, 99(2), pp.327-335.
chymotrypsin	Cod B	psychrophile	0.1	2	110	Bz-Tyr-NH-Np	10	non microbe	1764912	Asgeirsson, B. and Bjarnason, J.N.B., 1991. Structural and kinetic properties of chymotrypsin from Atlantic cod (Gadus morhua). Comparison with bovine chymotrypsin. Comparative biochemistry and physiology. B, Comparative biochemistry, 99(2), pp.327-335.
chymotrypsin	Bovine	mesophile	43	2.790697674	270	Bz-TyrOET	10	non microbe	1764912	Asgeirsson, B. and Bjarnason, J.N.B., 1991. Structural and kinetic properties of chymotrypsin from Atlantic cod (Gadus morhua). Comparison with bovine chymotrypsin. Comparative biochemistry and physiology. B, Comparative biochemistry, 99(2), pp.327-335.
chymotrypsin	Cod B	psychrophile	120	2.790697674	200	Bz-TyrOET	10	non microbe	1764912	Asgeirsson, B. and Bjarnason, J.N.B., 1991. Structural and kinetic properties of chymotrypsin from Atlantic cod (Gadus morhua). Comparison with bovine chymotrypsin. Comparative biochemistry and physiology. B, Comparative biochemistry, 99(2), pp.327-335.
