# Supplementary material for: Systematic investigation of the link between enzyme catalysis and cold adaptation
Source: eLife. 2022 Jan 12;11:e72884. doi: 10.7554/eLife.72884 (PMC8754429; doi:10.7554/eLife.72884)
Supplement: Figure 2—source data 2. [file elife-72884-fig2-data2.csv]

ec	substrate	organism	median_kcat	temp_min	temp_max	range_TGrowth	log10_slope	log10_p	log10_slope_r2	n_org	TAssay	is_mutant	fold_change
1.1.1.1	2-propanol	Aeropyrum pernix	0.24	54	90	36	-0.0854908515283997	NA	1	2	60	UNKNOWN	1195.83333333333
1.1.1.1	2-propanol	Geobacillus stearothermophilus	287	54	90	36	-0.0854908515283997	NA	1	2	60	UNKNOWN	1195.83333333333
1.1.1.1	2,3-butanediol	Pyrococcus furiosus	0.5365	60	96	36	-0.0531084551167259	NA	1	2	45	0	81.6402609506058
1.1.1.1	2,3-butanediol	Thermococcus kodakarensis	43.8	60	96	36	-0.0531084551167259	NA	1	2	70	UNKNOWN	81.6402609506058
1.1.1.1	4-methoxybenzyl alcohol	Aeropyrum pernix	0.6	71	90	19	-0.022419406961699	NA	1	2	60	UNKNOWN	2.66666666666667
1.1.1.1	4-methoxybenzyl alcohol	Thermus thermophilus	1.6	71	90	19	-0.022419406961699	NA	1	2	65	UNKNOWN	2.66666666666667
1.1.1.1	acetaldehyde	Geobacillus stearothermophilus	681	24	57	33	-0.00361471442713371	0.937422551222318	0.00241749528329755	5	60	0	12.8937189169276
1.1.1.1	acetaldehyde	Geobacillus thermodenitrificans	271.45	24	57	33	-0.00361471442713371	0.937422551222318	0.00241749528329755	5	60	UNKNOWN	12.8937189169276
1.1.1.1	acetaldehyde	Kluyveromyces marxianus	168	24	57	33	-0.00361471442713371	0.937422551222318	0.00241749528329755	5	NA	UNKNOWN	12.8937189169276
1.1.1.1	acetaldehyde	Natronomonas pharaonis	2.85	24	57	33	-0.00361471442713371	0.937422551222318	0.00241749528329755	5	40	UNKNOWN	12.8937189169276
1.1.1.1	acetaldehyde	Ogataea angusta	3500	24	57	33	-0.00361471442713371	0.937422551222318	0.00241749528329755	5	22	UNKNOWN	12.8937189169276
1.1.1.1	benzyl alcohol	Aeropyrum pernix	1.02	54	90	36	-0.0385444215370505	NA	1	2	60	UNKNOWN	24.4117647058824
1.1.1.1	benzyl alcohol	Geobacillus stearothermophilus	24.9	54	90	36	-0.0385444215370505	NA	1	2	30	0	24.4117647058824
1.1.1.1	ethanol	Aeropyrum pernix	0.23	22	90	68	-0.0491092335814867	0.136112276685175	0.288247384511354	9	60	UNKNOWN	587.608695652174
1.1.1.1	ethanol	Flavobacterium frigidimaris	135.15	22	90	68	-0.0491092335814867	0.136112276685175	0.288247384511354	9	10	UNKNOWN	587.608695652174
1.1.1.1	ethanol	Geobacillus stearothermophilus	305	22	90	68	-0.0491092335814867	0.136112276685175	0.288247384511354	9	60	0	587.608695652174
1.1.1.1	ethanol	Geobacillus thermodenitrificans	387.45	22	90	68	-0.0491092335814867	0.136112276685175	0.288247384511354	9	60	UNKNOWN	587.608695652174
1.1.1.1	ethanol	Kluyveromyces marxianus	87.5	22	90	68	-0.0491092335814867	0.136112276685175	0.288247384511354	9	NA	UNKNOWN	587.608695652174
1.1.1.1	ethanol	Natronomonas pharaonis	4.3	22	90	68	-0.0491092335814867	0.136112276685175	0.288247384511354	9	40	UNKNOWN	587.608695652174
1.1.1.1	ethanol	Ogataea angusta	3000	22	90	68	-0.0491092335814867	0.136112276685175	0.288247384511354	9	22	UNKNOWN	587.608695652174
1.1.1.1	ethanol	Picrophilus torridus	0.00086	22	90	68	-0.0491092335814867	0.136112276685175	0.288247384511354	9	NA	UNKNOWN	587.608695652174
1.1.1.1	ethanol	Saccharomyces cerevisiae	432.3	22	90	68	-0.0491092335814867	0.136112276685175	0.288247384511354	9	25	UNKNOWN	587.608695652174
1.1.1.1	nad+	Aeropyrum pernix	0.4	54	96	42	-0.0480825222081654	0.0325474928572076	0.632302194974767	7	60	UNKNOWN	18.3333333333333
1.1.1.1	nad+	Geobacillus stearothermophilus	33	54	96	42	-0.0480825222081654	0.0325474928572076	0.632302194974767	7	30	0	18.3333333333333
1.1.1.1	nad+	Geobacillus thermodenitrificans	240.8	54	96	42	-0.0480825222081654	0.0325474928572076	0.632302194974767	7	60	UNKNOWN	18.3333333333333
1.1.1.1	nad+	Pyrococcus furiosus	1.8	54	96	42	-0.0480825222081654	0.0325474928572076	0.632302194974767	7	45	0	18.3333333333333
1.1.1.1	nad+	Sulfolobus acidocaldarius	11.5	54	96	42	-0.0480825222081654	0.0325474928572076	0.632302194974767	7	65	UNKNOWN	18.3333333333333
1.1.1.1	nad+	Thermococcus kodakarensis	20.6	54	96	42	-0.0480825222081654	0.0325474928572076	0.632302194974767	7	70	UNKNOWN	18.3333333333333
1.1.1.1	nad+	Thermus thermophilus	0.84	54	96	42	-0.0480825222081654	0.0325474928572076	0.632302194974767	7	65	UNKNOWN	18.3333333333333
1.1.1.1	nadh	Aeropyrum pernix	0.41	54	96	42	-0.0740689167984179	0.00518268128801998	0.817520967825147	7	60	UNKNOWN	512.5
1.1.1.1	nadh	Geobacillus stearothermophilus	184.5	54	96	42	-0.0740689167984179	0.00518268128801998	0.817520967825147	7	60	UNKNOWN	512.5
1.1.1.1	nadh	Geobacillus thermodenitrificans	1646	54	96	42	-0.0740689167984179	0.00518268128801998	0.817520967825147	7	60	UNKNOWN	512.5
1.1.1.1	nadh	Pyrococcus furiosus	0.36	54	96	42	-0.0740689167984179	0.00518268128801998	0.817520967825147	7	45	0	512.5
1.1.1.1	nadh	Sulfolobus acidocaldarius	14.1	54	96	42	-0.0740689167984179	0.00518268128801998	0.817520967825147	7	65	UNKNOWN	512.5
1.1.1.1	nadh	Thermococcus kodakarensis	16.45	54	96	42	-0.0740689167984179	0.00518268128801998	0.817520967825147	7	70	UNKNOWN	512.5
1.1.1.1	nadh	Thermus thermophilus	52.4	54	96	42	-0.0740689167984179	0.00518268128801998	0.817520967825147	7	65	UNKNOWN	512.5
1.1.1.1	nadp+	Geobacillus thermodenitrificans	163.5	57	96	39	-0.0823404916931806	0.116537980118994	0.966862615724897	3	60	UNKNOWN	3174.7572815534
1.1.1.1	nadp+	Pyrococcus furiosus	0.0515	57	96	39	-0.0823404916931806	0.116537980118994	0.966862615724897	3	45	0	3174.7572815534
1.1.1.1	nadp+	Thermococcus kodakarensis	20.25	57	96	39	-0.0823404916931806	0.116537980118994	0.966862615724897	3	70	UNKNOWN	3174.7572815534
1.1.1.1	nadph	Geobacillus thermodenitrificans	4808	57	96	39	-0.112331652905915	NA	1	2	60	UNKNOWN	24040
1.1.1.1	nadph	Pyrococcus furiosus	0.2	57	96	39	-0.112331652905915	NA	1	2	45	0	24040
1.1.1.10	d-ribulose	Neurospora crassa	119	24	25	1	1.15961974969542	NA	1	2	NA	UNKNOWN	0.0692436974789916
1.1.1.10	d-ribulose	Trichoderma reesei	8.24	24	25	1	1.15961974969542	NA	1	2	30	UNKNOWN	0.0692436974789916
1.1.1.10	xylitol	Neurospora crassa	5.6	24	25	1	0.748188027006206	NA	1	2	NA	UNKNOWN	0.178571428571429
1.1.1.10	xylitol	Trichoderma reesei	1	24	25	1	0.748188027006206	NA	1	2	30	UNKNOWN	0.178571428571429
1.1.1.100	acetoacetyl-coa	Cupriavidus necator	102	28	37	9	-0.0712440960968527	0.410616001975263	0.23262765895331	5	30	0	10.6818181818182
1.1.1.100	acetoacetyl-coa	Mycobacterium tuberculosis	7	28	37	9	-0.0712440960968527	0.410616001975263	0.23262765895331	5	25	UNKNOWN	10.6818181818182
1.1.1.100	acetoacetyl-coa	Plasmodium falciparum	259	28	37	9	-0.0712440960968527	0.410616001975263	0.23262765895331	5	NA	UNKNOWN	10.6818181818182
1.1.1.100	acetoacetyl-coa	Saccharomyces cerevisiae	117.5	28	37	9	-0.0712440960968527	0.410616001975263	0.23262765895331	5	25	0	10.6818181818182
1.1.1.100	acetoacetyl-coa	Streptococcus pneumoniae	11	28	37	9	-0.0712440960968527	0.410616001975263	0.23262765895331	5	30	UNKNOWN	10.6818181818182
1.1.1.100	nadph	Cupriavidus necator	102	28	37	9	-0.10918465760474	0.343866151753996	0.223360198441541	6	30	0	10.6818181818182
1.1.1.100	nadph	Escherichia coli	0.59	28	37	9	-0.10918465760474	0.343866151753996	0.223360198441541	6	NA	UNKNOWN	10.6818181818182
1.1.1.100	nadph	Mycobacterium tuberculosis	7	28	37	9	-0.10918465760474	0.343866151753996	0.223360198441541	6	30	UNKNOWN	10.6818181818182
1.1.1.100	nadph	Plasmodium falciparum	254.5	28	37	9	-0.10918465760474	0.343866151753996	0.223360198441541	6	25	UNKNOWN	10.6818181818182
1.1.1.100	nadph	Saccharomyces cerevisiae	117.5	28	37	9	-0.10918465760474	0.343866151753996	0.223360198441541	6	25	0	10.6818181818182
1.1.1.100	nadph	Streptococcus pneumoniae	11	28	37	9	-0.10918465760474	0.343866151753996	0.223360198441541	6	30	UNKNOWN	10.6818181818182
1.1.1.103	l-threonine	Cupriavidus necator	46.9	29	95	66	-0.00954212359934633	NA	1	2	30	0	4.26363636363636
1.1.1.103	l-threonine	Pyrococcus horikoshii	11	29	95	66	-0.00954212359934633	NA	1	2	65	UNKNOWN	4.26363636363636
1.1.1.103	nad+	Cupriavidus necator	38	29	95	66	-0.00940518491357146	NA	1	2	30	0	4.17582417582418
1.1.1.103	nad+	Pyrococcus horikoshii	9.1	29	95	66	-0.00940518491357146	NA	1	2	65	0	4.17582417582418
1.1.1.107	pyridoxal	Mesorhizobium loti	149	26	30	4	-0.100216140422338	NA	1	2	30	UNKNOWN	2.51689189189189
1.1.1.107	pyridoxal	Microbacterium luteolum	59.2	26	30	4	-0.100216140422338	NA	1	2	30	UNKNOWN	2.51689189189189
1.1.1.12	l-arabinitol	Aspergillus niger	11.425	24	26	2	0.317324036873219	0.641801328014633	0.081364926444984	5	22	UNKNOWN	1.58424507658643
1.1.1.12	l-arabinitol	Meyerozyma caribbica	0.108	24	26	2	0.317324036873219	0.641801328014633	0.081364926444984	5	30	UNKNOWN	1.58424507658643
1.1.1.12	l-arabinitol	Neurospora crassa	20.2	24	26	2	0.317324036873219	0.641801328014633	0.081364926444984	5	25	UNKNOWN	1.58424507658643
1.1.1.12	l-arabinitol	Penicillium chrysogenum	18.1	24	26	2	0.317324036873219	0.641801328014633	0.081364926444984	5	22	UNKNOWN	1.58424507658643
1.1.1.12	l-arabinitol	Trichoderma reesei	22.65	24	26	2	0.317324036873219	0.641801328014633	0.081364926444984	5	22	UNKNOWN	1.58424507658643
1.1.1.12	nad+	Aspergillus niger	8.23	24	26	2	-0.0482362791896473	0.757311932024095	0.0588974983378776	4	22	UNKNOWN	1.49210206561361
1.1.1.12	nad+	Neurospora crassa	15.465	24	26	2	-0.0482362791896473	0.757311932024095	0.0588974983378776	4	25	0	1.49210206561361
1.1.1.12	nad+	Penicillium chrysogenum	17.3	24	26	2	-0.0482362791896473	0.757311932024095	0.0588974983378776	4	22	UNKNOWN	1.49210206561361
1.1.1.12	nad+	Trichoderma reesei	7.26	24	26	2	-0.0482362791896473	0.757311932024095	0.0588974983378776	4	22	UNKNOWN	1.49210206561361
1.1.1.12	xylitol	Aspergillus niger	599.835	25	26	1	1.60194054392068	NA	1	2	20	0	0.0250068768911451
1.1.1.12	xylitol	Neurospora crassa	15	25	26	1	1.60194054392068	NA	1	2	25	UNKNOWN	0.0250068768911451
1.1.1.169	2-dehydropantoate	Escherichia coli	25	36	60	24	-0.00143033453249554	NA	1	2	27	0	1.08225108225108
1.1.1.169	2-dehydropantoate	Thermococcus kodakarensis	23.1	36	60	24	-0.00143033453249554	NA	1	2	70	UNKNOWN	1.08225108225108
1.1.1.169	nadph	Escherichia coli	25	36	60	24	-0.0412538106831736	0.074373086916452	0.98641390307488	3	27	0	11.2612612612613
1.1.1.169	nadph	Staphylococcus aureus	16.8	36	60	24	-0.0412538106831736	0.074373086916452	0.98641390307488	3	25	0	11.2612612612613
1.1.1.169	nadph	Thermococcus kodakarensis	2.22	36	60	24	-0.0412538106831736	0.074373086916452	0.98641390307488	3	70	UNKNOWN	11.2612612612613
1.1.1.173	l-rhamnose	Debaryomyces hansenii	2860	25	26	1	-0.277389085835872	NA	1	2	30	UNKNOWN	1.89403973509934
1.1.1.173	l-rhamnose	Scheffersomyces stipitis	1510	25	26	1	-0.277389085835872	NA	1	2	30	UNKNOWN	1.89403973509934
1.1.1.179	d-glucose	Haloarcula marismortui	273	24	37	13	0.129252907028328	NA	1	2	37	UNKNOWN	0.0208791208791209
1.1.1.179	d-glucose	Trichoderma reesei	5.7	24	37	13	0.129252907028328	NA	1	2	30	UNKNOWN	0.0208791208791209
1.1.1.179	d-xylose	Haloarcula marismortui	356	24	37	13	0.0961619697344793	0.375122061626214	0.691164563042832	3	37	UNKNOWN	0.0612359550561798
1.1.1.179	d-xylose	Paenarthrobacter nicotinovorans	14.9	24	37	13	0.0961619697344793	0.375122061626214	0.691164563042832	3	28	UNKNOWN	0.0612359550561798
1.1.1.179	d-xylose	Trichoderma reesei	21.8	24	37	13	0.0961619697344793	0.375122061626214	0.691164563042832	3	30	UNKNOWN	0.0612359550561798
1.1.1.184	nadph	Candida parapsilosis	1.48	25	37	12	0.147910768457741	0.101873830913695	0.974610461113874	3	35	0	0.0180232558139535
1.1.1.184	nadph	Kluyveromyces marxianus	3.17	25	37	12	0.147910768457741	0.101873830913695	0.974610461113874	3	25	UNKNOWN	0.0180232558139535
1.1.1.184	nadph	Methanobacterium palustre	129	25	37	12	0.147910768457741	0.101873830913695	0.974610461113874	3	37	UNKNOWN	0.0180232558139535
1.1.1.195	cinnamyl alcohol	Geobacillus stearothermophilus	43	37	54	17	0.0299774596830883	NA	1	2	50	UNKNOWN	0.309302325581395
1.1.1.195	cinnamyl alcohol	Helicobacter pylori	13.3	37	54	17	0.0299774596830883	NA	1	2	37	UNKNOWN	0.309302325581395
1.1.1.2	acetaldehyde	Escherichia coli	53.5	36	96	60	-0.0164665182087831	NA	1	2	37	UNKNOWN	9.72727272727273
1.1.1.2	acetaldehyde	Pyrococcus furiosus	5.5	36	96	60	-0.0164665182087831	NA	1	2	80	UNKNOWN	9.72727272727273
1.1.1.2	nadp+	Lactobacillus brevis	4.4	33	96	63	0.0161888458497178	0.685897046335798	0.0986606655005762	4	30	0	0.278481012658228
1.1.1.2	nadp+	Pyrococcus furiosus	15.8	33	96	63	0.0161888458497178	0.685897046335798	0.0986606655005762	4	80	UNKNOWN	0.278481012658228
1.1.1.2	nadp+	Thermococcus guaymasensis	1333	33	96	63	0.0161888458497178	0.685897046335798	0.0986606655005762	4	80	UNKNOWN	0.278481012658228
1.1.1.2	nadp+	Thermococcus sibiricus	0.45	33	96	63	0.0161888458497178	0.685897046335798	0.0986606655005762	4	60	UNKNOWN	0.278481012658228
1.1.1.2	nadph	Lactobacillus brevis	38.1	26	96	70	0.000540358400884261	0.971809641273346	0.000490288777071205	5	30	0	0.753968253968254
1.1.1.2	nadph	Pyrococcus furiosus	6.3	26	96	70	0.000540358400884261	0.971809641273346	0.000490288777071205	5	80	UNKNOWN	0.753968253968254
1.1.1.2	nadph	Scheffersomyces stipitis	4.75	26	96	70	0.000540358400884261	0.971809641273346	0.000490288777071205	5	30	UNKNOWN	0.753968253968254
1.1.1.2	nadph	Thermococcus guaymasensis	158	26	96	70	0.000540358400884261	0.971809641273346	0.000490288777071205	5	80	UNKNOWN	0.753968253968254
1.1.1.2	nadph	Thermococcus sibiricus	1.51	26	96	70	0.000540358400884261	0.971809641273346	0.000490288777071205	5	60	UNKNOWN	0.753968253968254
1.1.1.2	pentanal	Pectobacterium atrosepticum	49.2	27	28	1	2.09683939027728	NA	1	2	NA	UNKNOWN	0.00800130102455684
1.1.1.2	pentanal	Saccharomyces cerevisiae	6149	27	28	1	2.09683939027728	NA	1	2	25	UNKNOWN	0.00800130102455684
1.1.1.2	phenylethanol	Lactobacillus brevis	5.4	28	33	5	-0.464290533405857	NA	1	2	30	0	209.62962962963
1.1.1.2	phenylethanol	Saccharomyces cerevisiae	1132	28	33	5	-0.464290533405857	NA	1	2	25	UNKNOWN	209.62962962963
1.1.1.203	beta-d-galacturonate	Agrobacterium tumefaciens	67.5	20	34	14	-0.0415947081231277	0.26226485403796	0.203234609913914	8	NA	UNKNOWN	2.41926345609065
1.1.1.203	beta-d-galacturonate	Chromohalobacter salexigens	15.3	20	34	14	-0.0415947081231277	0.26226485403796	0.203234609913914	8	25	UNKNOWN	2.41926345609065
1.1.1.203	beta-d-galacturonate	Fulvimarina pelagi	11.5	20	34	14	-0.0415947081231277	0.26226485403796	0.203234609913914	8	NA	UNKNOWN	2.41926345609065
1.1.1.203	beta-d-galacturonate	Oceanicola granulosus	3.5	20	34	14	-0.0415947081231277	0.26226485403796	0.203234609913914	8	NA	UNKNOWN	2.41926345609065
1.1.1.203	beta-d-galacturonate	Polaromonas naphthalenivorans	42.7	20	34	14	-0.0415947081231277	0.26226485403796	0.203234609913914	8	25	UNKNOWN	2.41926345609065
1.1.1.203	beta-d-galacturonate	Pseudomonas fluorescens	17.1	20	34	14	-0.0415947081231277	0.26226485403796	0.203234609913914	8	25	UNKNOWN	2.41926345609065
1.1.1.203	beta-d-galacturonate	Pseudomonas mendocina	17.65	20	34	14	-0.0415947081231277	0.26226485403796	0.203234609913914	8	25	UNKNOWN	2.41926345609065
1.1.1.203	beta-d-galacturonate	Streptomyces viridochromogenes	20	20	34	14	-0.0415947081231277	0.26226485403796	0.203234609913914	8	NA	UNKNOWN	2.41926345609065
1.1.1.203	beta-d-glucuronate	Agrobacterium tumefaciens	252	20	34	14	-0.0353793624449314	0.489566370877112	0.0827799015703775	8	NA	UNKNOWN	1.86923076923077
1.1.1.203	beta-d-glucuronate	Chromohalobacter salexigens	119	20	34	14	-0.0353793624449314	0.489566370877112	0.0827799015703775	8	25	UNKNOWN	1.86923076923077
1.1.1.203	beta-d-glucuronate	Fulvimarina pelagi	70	20	34	14	-0.0353793624449314	0.489566370877112	0.0827799015703775	8	NA	UNKNOWN	1.86923076923077
1.1.1.203	beta-d-glucuronate	Oceanicola granulosus	6.5	20	34	14	-0.0353793624449314	0.489566370877112	0.0827799015703775	8	NA	UNKNOWN	1.86923076923077
1.1.1.203	beta-d-glucuronate	Polaromonas naphthalenivorans	243	20	34	14	-0.0353793624449314	0.489566370877112	0.0827799015703775	8	25	UNKNOWN	1.86923076923077
1.1.1.203	beta-d-glucuronate	Pseudomonas fluorescens	152	20	34	14	-0.0353793624449314	0.489566370877112	0.0827799015703775	8	25	UNKNOWN	1.86923076923077
1.1.1.203	beta-d-glucuronate	Pseudomonas mendocina	130	20	34	14	-0.0353793624449314	0.489566370877112	0.0827799015703775	8	25	UNKNOWN	1.86923076923077
1.1.1.203	beta-d-glucuronate	Streptomyces viridochromogenes	64	20	34	14	-0.0353793624449314	0.489566370877112	0.0827799015703775	8	NA	UNKNOWN	1.86923076923077
1.1.1.203	d-galacturonate	Agrobacterium tumefaciens	0.92	26	28	2	-0.731361717009511	NA	1	2	NA	UNKNOWN	29.0217391304348
1.1.1.203	d-galacturonate	Pseudomonas syringae	26.7	26	28	2	-0.731361717009511	NA	1	2	NA	UNKNOWN	29.0217391304348
1.1.1.203	d-glucuronate	Agrobacterium tumefaciens	1.9	26	28	2	-0.812168193019559	NA	1	2	NA	UNKNOWN	42.1052631578947
1.1.1.203	d-glucuronate	Pseudomonas syringae	80	26	28	2	-0.812168193019559	NA	1	2	NA	UNKNOWN	42.1052631578947
1.1.1.203	d-mannuronate	Agrobacterium tumefaciens	88.5	27	30	3	-0.106445314290069	0.807197200983052	0.0371729193087697	4	NA	UNKNOWN	2.2972972972973
1.1.1.203	d-mannuronate	Fulvimarina pelagi	92.5	27	30	3	-0.106445314290069	0.807197200983052	0.0371729193087697	4	NA	UNKNOWN	2.2972972972973
1.1.1.203	d-mannuronate	Oceanicola granulosus	3.7	27	30	3	-0.106445314290069	0.807197200983052	0.0371729193087697	4	NA	UNKNOWN	2.2972972972973
1.1.1.203	d-mannuronate	Streptomyces viridochromogenes	8.5	27	30	3	-0.106445314290069	0.807197200983052	0.0371729193087697	4	NA	UNKNOWN	2.2972972972973
1.1.1.203	nad+	Agrobacterium tumefaciens	144	27	30	3	-0.294716499706382	0.363970611851664	0.404533382588346	4	NA	UNKNOWN	8.85714285714286
1.1.1.203	nad+	Fulvimarina pelagi	113	27	30	3	-0.294716499706382	0.363970611851664	0.404533382588346	4	NA	UNKNOWN	8.85714285714286
1.1.1.203	nad+	Oceanicola granulosus	7	27	30	3	-0.294716499706382	0.363970611851664	0.404533382588346	4	NA	UNKNOWN	8.85714285714286
1.1.1.203	nad+	Streptomyces viridochromogenes	62	27	30	3	-0.294716499706382	0.363970611851664	0.404533382588346	4	NA	UNKNOWN	8.85714285714286
1.1.1.205	imp	Bacillus amyloliquefaciens	5.1	28	37	9	-0.0421511679408181	0.434942936789895	0.125839193540516	7	40	0	1.11818181818182
1.1.1.205	imp	Bacillus anthracis	5.3	28	37	9	-0.0421511679408181	0.434942936789895	0.125839193540516	7	25	0	1.11818181818182
1.1.1.205	imp	Campylobacter jejuni	2.2	28	37	9	-0.0421511679408181	0.434942936789895	0.125839193540516	7	25	0	1.11818181818182
1.1.1.205	imp	Clostridium perfringens	2.9	28	37	9	-0.0421511679408181	0.434942936789895	0.125839193540516	7	25	0	1.11818181818182
1.1.1.205	imp	Eremothecium gossypii	2.46	28	37	9	-0.0421511679408181	0.434942936789895	0.125839193540516	7	28	0	1.11818181818182
1.1.1.205	imp	Mycobacterium tuberculosis	0.53	28	37	9	-0.0421511679408181	0.434942936789895	0.125839193540516	7	22	0	1.11818181818182
1.1.1.205	imp	Streptococcus pyogenes	0.4	28	37	9	-0.0421511679408181	0.434942936789895	0.125839193540516	7	NA	UNKNOWN	1.11818181818182
1.1.1.205	inosine 5'-diphosphate	Bacillus anthracis	1.4	30	37	7	0.0998528577622885	NA	1	2	22	UNKNOWN	0.2
1.1.1.205	inosine 5'-diphosphate	Trypanosoma brucei	0.28	30	37	7	0.0998528577622885	NA	1	2	25	UNKNOWN	0.2
1.1.1.205	inosine 5'-phosphate	Borreliella burgdorferi	2.6	35	37	2	0.197480561796812	0.56358009524752	0.0899647974217286	6	NA	UNKNOWN	0.134529147982063
1.1.1.205	inosine 5'-phosphate	Escherichia coli	13	35	37	2	0.197480561796812	0.56358009524752	0.0899647974217286	6	NA	UNKNOWN	0.134529147982063
1.1.1.205	inosine 5'-phosphate	Mycobacterium tuberculosis	0.53	35	37	2	0.197480561796812	0.56358009524752	0.0899647974217286	6	25	UNKNOWN	0.134529147982063
1.1.1.205	inosine 5'-phosphate	Streptococcus pyogenes	24	35	37	2	0.197480561796812	0.56358009524752	0.0899647974217286	6	NA	UNKNOWN	0.134529147982063
1.1.1.205	inosine 5'-phosphate	Toxoplasma gondii	0.98	35	37	2	0.197480561796812	0.56358009524752	0.0899647974217286	6	37	UNKNOWN	0.134529147982063
1.1.1.205	inosine 5'-phosphate	Tritrichomonas suis	1.65	35	37	2	0.197480561796812	0.56358009524752	0.0899647974217286	6	25	UNKNOWN	0.134529147982063
1.1.1.205	nad+	Borreliella burgdorferi	0.0433	35	37	2	0.32190532864277	0.581256439097529	0.175346169797281	4	NA	UNKNOWN	0.539944903581267
1.1.1.205	nad+	Mycobacterium tuberculosis	1.815	35	37	2	0.32190532864277	0.581256439097529	0.175346169797281	4	22	0	0.539944903581267
1.1.1.205	nad+	Toxoplasma gondii	0.98	35	37	2	0.32190532864277	0.581256439097529	0.175346169797281	4	37	UNKNOWN	0.539944903581267
1.1.1.205	nad+	Tritrichomonas suis	1.65	35	37	2	0.32190532864277	0.581256439097529	0.175346169797281	4	25	UNKNOWN	0.539944903581267
1.1.1.22	nad+	Burkholderia cepacia	6.7	29	36	7	-0.134527807566845	0.311793129046135	0.473628697228109	4	30	0	9.2962962962963
1.1.1.22	nad+	Escherichia coli	5.4	29	36	7	-0.134527807566845	0.311793129046135	0.473628697228109	4	37	0	9.2962962962963
1.1.1.22	nad+	Pseudomonas aeruginosa	1.36	29	36	7	-0.134527807566845	0.311793129046135	0.473628697228109	4	22	UNKNOWN	9.2962962962963
1.1.1.22	nad+	Sphingomonas sanxanigenens	50.2	29	36	7	-0.134527807566845	0.311793129046135	0.473628697228109	4	37	UNKNOWN	9.2962962962963
1.1.1.22	udp-alpha-d-glucose	Burkholderia cepacia	6.9	29	30	1	-0.923829472990188	NA	1	2	30	0	8.39130434782609
1.1.1.22	udp-alpha-d-glucose	Sphingomonas sanxanigenens	57.9	29	30	1	-0.923829472990188	NA	1	2	37	UNKNOWN	8.39130434782609
1.1.1.25	3-dehydroshikimate	Corynebacterium glutamicum	223.5	31	37	6	-0.109846907906573	NA	1	2	30	UNKNOWN	4.56122448979592
1.1.1.25	3-dehydroshikimate	Mycobacterium tuberculosis	49	31	37	6	-0.109846907906573	NA	1	2	25	UNKNOWN	4.56122448979592
1.1.1.25	nad+	Helicobacter pylori	5.2	28	37	9	-0.110079382077996	NA	1	2	60	UNKNOWN	9.78846153846154
1.1.1.25	nad+	Pseudomonas putida	50.9	28	37	9	-0.110079382077996	NA	1	2	NA	UNKNOWN	9.78846153846154
1.1.1.25	nadp+	Archaeoglobus fulgidus	390	28	81	53	0.0166583143581831	0.41371848345544	0.113851750014275	8	87	UNKNOWN	0.67051282051282
1.1.1.25	nadp+	Escherichia coli	237	28	81	53	0.0166583143581831	0.41371848345544	0.113851750014275	8	20	UNKNOWN	0.67051282051282
1.1.1.25	nadp+	Helicobacter pylori	7.1	28	81	53	0.0166583143581831	0.41371848345544	0.113851750014275	8	60	UNKNOWN	0.67051282051282
1.1.1.25	nadp+	Mycobacterium tuberculosis	202.45	28	81	53	0.0166583143581831	0.41371848345544	0.113851750014275	8	25	UNKNOWN	0.67051282051282
1.1.1.25	nadp+	Pseudomonas putida	261.5	28	81	53	0.0166583143581831	0.41371848345544	0.113851750014275	8	NA	UNKNOWN	0.67051282051282
1.1.1.25	nadp+	Staphylococcus aureus	146.2	28	81	53	0.0166583143581831	0.41371848345544	0.113851750014275	8	25	UNKNOWN	0.67051282051282
1.1.1.25	nadp+	Staphylococcus epidermidis	22.8	28	81	53	0.0166583143581831	0.41371848345544	0.113851750014275	8	25	UNKNOWN	0.67051282051282
1.1.1.25	nadp+	Toxoplasma gondii	2.77	28	81	53	0.0166583143581831	0.41371848345544	0.113851750014275	8	25	UNKNOWN	0.67051282051282
1.1.1.25	quinate	Corynebacterium glutamicum	61.9	28	31	3	0.071783099604775	NA	1	2	30	UNKNOWN	0.609046849757674
1.1.1.25	quinate	Pseudomonas putida	37.7	28	31	3	0.071783099604775	NA	1	2	NA	UNKNOWN	0.609046849757674
1.1.1.25	shikimate	Aspergillus nidulans	1.5	28	37	9	0.0565813710532731	0.552511875193957	0.0526682316282317	9	25	UNKNOWN	0.319955817378498
1.1.1.25	shikimate	Corynebacterium glutamicum	85.2	28	37	9	0.0565813710532731	0.552511875193957	0.0526682316282317	9	30	UNKNOWN	0.319955817378498
1.1.1.25	shikimate	Escherichia coli	237	28	37	9	0.0565813710532731	0.552511875193957	0.0526682316282317	9	20	UNKNOWN	0.319955817378498
1.1.1.25	shikimate	Helicobacter pylori	7.7	28	37	9	0.0565813710532731	0.552511875193957	0.0526682316282317	9	60	UNKNOWN	0.319955817378498
1.1.1.25	shikimate	Mycobacterium tuberculosis	203.6	28	37	9	0.0565813710532731	0.552511875193957	0.0526682316282317	9	25	UNKNOWN	0.319955817378498
1.1.1.25	shikimate	Pseudomonas putida	43.45	28	37	9	0.0565813710532731	0.552511875193957	0.0526682316282317	9	NA	UNKNOWN	0.319955817378498
1.1.1.25	shikimate	Staphylococcus aureus	135.8	28	37	9	0.0565813710532731	0.552511875193957	0.0526682316282317	9	25	UNKNOWN	0.319955817378498
1.1.1.25	shikimate	Staphylococcus epidermidis	22.8	28	37	9	0.0565813710532731	0.552511875193957	0.0526682316282317	9	25	UNKNOWN	0.319955817378498
1.1.1.25	shikimate	Toxoplasma gondii	2.78	28	37	9	0.0565813710532731	0.552511875193957	0.0526682316282317	9	25	UNKNOWN	0.319955817378498
1.1.1.261	dihydroxyacetone phosphate	Aeropyrum pernix	2.95	80	90	10	0.0274805443702002	0.435234366158522	0.60103312767219	3	65	UNKNOWN	0.508433734939759
1.1.1.261	dihydroxyacetone phosphate	Methanocaldococcus jannaschii	2.11	80	90	10	0.0274805443702002	0.435234366158522	0.60103312767219	3	50	UNKNOWN	0.508433734939759
1.1.1.261	dihydroxyacetone phosphate	Pyrobaculum calidifontis	5.35	80	90	10	0.0274805443702002	0.435234366158522	0.60103312767219	3	50	0	0.508433734939759
1.1.1.261	nadh	Aeropyrum pernix	2.4	80	90	10	0.0188357729928594	0.797681006859126	0.0976433239829069	3	65	UNKNOWN	0.497014925373134
1.1.1.261	nadh	Methanocaldococcus jannaschii	3.33	80	90	10	0.0188357729928594	0.797681006859126	0.0976433239829069	3	50	UNKNOWN	0.497014925373134
1.1.1.261	nadh	Pyrobaculum calidifontis	11	80	90	10	0.0188357729928594	0.797681006859126	0.0976433239829069	3	50	0	0.497014925373134
1.1.1.261	nadph	Aeropyrum pernix	0.044	80	90	10	-0.14799895101026	0.269969847586698	0.830691458913932	3	65	UNKNOWN	21.25
1.1.1.261	nadph	Methanocaldococcus jannaschii	3.23	80	90	10	-0.14799895101026	0.269969847586698	0.830691458913932	3	50	UNKNOWN	21.25
1.1.1.261	nadph	Pyrobaculum calidifontis	0.26	80	90	10	-0.14799895101026	0.269969847586698	0.830691458913932	3	50	0	21.25
1.1.1.267	1-deoxy-d-xylulose 5-phosphate	Escherichia coli	33	33	37	4	0.0951051697689903	0.695663360521904	0.0926207901288204	4	37	UNKNOWN	0.468965517241379
1.1.1.267	1-deoxy-d-xylulose 5-phosphate	Francisella tularensis	2	33	37	4	0.0951051697689903	0.695663360521904	0.0926207901288204	4	22	UNKNOWN	0.468965517241379
1.1.1.267	1-deoxy-d-xylulose 5-phosphate	Mycobacterium tuberculosis	5.25	33	37	4	0.0951051697689903	0.695663360521904	0.0926207901288204	4	25	0	0.468965517241379
1.1.1.267	1-deoxy-d-xylulose 5-phosphate	Yersinia pestis	1.7	33	37	4	0.0951051697689903	0.695663360521904	0.0926207901288204	4	37	UNKNOWN	0.468965517241379
1.1.1.267	nadph	Francisella tularensis	1.3	33	75	42	0.00556039566141853	0.667066153368274	0.110844946232998	4	22	UNKNOWN	0.345423143350604
1.1.1.267	nadph	Mycobacterium tuberculosis	5.275	33	75	42	0.00556039566141853	0.667066153368274	0.110844946232998	4	25	UNKNOWN	0.345423143350604
1.1.1.267	nadph	Thermotoga maritima	2.895	33	75	42	0.00556039566141853	0.667066153368274	0.110844946232998	4	50	UNKNOWN	0.345423143350604
1.1.1.267	nadph	Yersinia pestis	1	33	75	42	0.00556039566141853	0.667066153368274	0.110844946232998	4	37	UNKNOWN	0.345423143350604
1.1.1.27	nad+	Geobacillus stearothermophilus	32	37	54	17	-0.012647607358003	NA	1	2	25	0	1.640625
1.1.1.27	nad+	Plasmodium falciparum	52.5	37	54	17	-0.012647607358003	NA	1	2	NA	UNKNOWN	1.640625
1.1.1.27	pyruvate	Deinococcus radiodurans	884	25	71	46	0.00206591890500166	0.856918988530889	0.00715444003525136	7	0	UNKNOWN	0.334319526627219
1.1.1.27	pyruvate	Enterococcus mundtii	1500	25	71	46	0.00206591890500166	0.856918988530889	0.00715444003525136	7	NA	0	0.334319526627219
1.1.1.27	pyruvate	Geobacillus stearothermophilus	250	25	71	46	0.00206591890500166	0.856918988530889	0.00715444003525136	7	25	0	0.334319526627219
1.1.1.27	pyruvate	Lactobacillus helveticus	643	25	71	46	0.00206591890500166	0.856918988530889	0.00715444003525136	7	NA	UNKNOWN	0.334319526627219
1.1.1.27	pyruvate	Plasmodium falciparum	122.15	25	71	46	0.00206591890500166	0.856918988530889	0.00715444003525136	7	NA	UNKNOWN	0.334319526627219
1.1.1.27	pyruvate	Rhizopus delemar	226	25	71	46	0.00206591890500166	0.856918988530889	0.00715444003525136	7	NA	UNKNOWN	0.334319526627219
1.1.1.27	pyruvate	Thermus thermophilus	676	25	71	46	0.00206591890500166	0.856918988530889	0.00715444003525136	7	0	UNKNOWN	0.334319526627219
1.1.1.276	l-allo-threonine	Escherichia coli	5.76	28	36	8	-0.110131453385111	NA	1	2	30	UNKNOWN	7.60416666666667
1.1.1.276	l-allo-threonine	Saccharomyces cerevisiae	43.8	28	36	8	-0.110131453385111	NA	1	2	30	UNKNOWN	7.60416666666667
1.1.1.276	l-serine	Escherichia coli	4.2	28	36	8	-0.0522679243450406	NA	1	2	30	UNKNOWN	2.61904761904762
1.1.1.276	l-serine	Saccharomyces cerevisiae	11	28	36	8	-0.0522679243450406	NA	1	2	30	UNKNOWN	2.61904761904762
1.1.1.28	2-oxobutyrate	Escherichia coli	31	33	36	3	-0.204279751072794	0.133078053900567	0.956935680048733	3	30	UNKNOWN	3.87096774193548
1.1.1.28	2-oxobutyrate	Lactobacillus pentosus	120	33	36	3	-0.204279751072794	0.133078053900567	0.956935680048733	3	30	0	3.87096774193548
1.1.1.28	2-oxobutyrate	Pseudomonas aeruginosa	100	33	36	3	-0.204279751072794	0.133078053900567	0.956935680048733	3	30	UNKNOWN	3.87096774193548
1.1.1.28	glyoxylate	Escherichia coli	100	33	36	3	-0.190709837770436	0.577418134945438	0.37958727422488	3	30	UNKNOWN	2.7
1.1.1.28	glyoxylate	Lactobacillus pentosus	270	33	36	3	-0.190709837770436	0.577418134945438	0.37958727422488	3	30	0	2.7
1.1.1.28	glyoxylate	Pseudomonas aeruginosa	880	33	36	3	-0.190709837770436	0.577418134945438	0.37958727422488	3	30	UNKNOWN	2.7
1.1.1.28	hydroxypyruvate	Escherichia coli	50	33	36	3	-0.269874389888402	0.351929753250752	0.724290232029174	3	30	UNKNOWN	5.17
1.1.1.28	hydroxypyruvate	Lactobacillus pentosus	258.5	33	36	3	-0.269874389888402	0.351929753250752	0.724290232029174	3	30	0	5.17
1.1.1.28	hydroxypyruvate	Pseudomonas aeruginosa	420	33	36	3	-0.269874389888402	0.351929753250752	0.724290232029174	3	30	UNKNOWN	5.17
1.1.1.28	nadh	Escherichia coli	700	34	37	3	-0.0591873697532879	0.830462475717745	0.0692596451111043	3	30	UNKNOWN	2.00831024930748
1.1.1.28	nadh	Lactobacillus jensenii	144.4	34	37	3	-0.0591873697532879	0.830462475717745	0.0692596451111043	3	25	UNKNOWN	2.00831024930748
1.1.1.28	nadh	Pseudomonas aeruginosa	290	34	37	3	-0.0591873697532879	0.830462475717745	0.0692596451111043	3	30	UNKNOWN	2.00831024930748
1.1.1.28	oxaloacetate	Escherichia coli	1100	33	36	3	0.20039624597875	0.0382180870673081	0.996400386611392	3	30	UNKNOWN	0.254545454545455
1.1.1.28	oxaloacetate	Lactobacillus pentosus	280	33	36	3	0.20039624597875	0.0382180870673081	0.996400386611392	3	30	0	0.254545454545455
1.1.1.28	oxaloacetate	Pseudomonas aeruginosa	410	33	36	3	0.20039624597875	0.0382180870673081	0.996400386611392	3	30	UNKNOWN	0.254545454545455
1.1.1.28	phenylpyruvate	Lactobacillus pentosus	40	31	35	4	-0.0168159579642771	0.949232533062627	0.0025773356992373	4	30	0	0.567213114754098
1.1.1.28	phenylpyruvate	Pediococcus acidilactici	305	31	35	4	-0.0168159579642771	0.949232533062627	0.0025773356992373	4	30	UNKNOWN	0.567213114754098
1.1.1.28	phenylpyruvate	Pediococcus pentosaceus	173	31	35	4	-0.0168159579642771	0.949232533062627	0.0025773356992373	4	45	UNKNOWN	0.567213114754098
1.1.1.28	phenylpyruvate	Pseudomonas aeruginosa	18	31	35	4	-0.0168159579642771	0.949232533062627	0.0025773356992373	4	30	UNKNOWN	0.567213114754098
1.1.1.28	pyruvate	Bacillus coagulans	11.3	31	37	6	-0.178669545346215	0.146781947421083	0.446637385001356	6	30	UNKNOWN	28.3185840707965
1.1.1.28	pyruvate	Escherichia coli	390	31	37	6	-0.178669545346215	0.146781947421083	0.446637385001356	6	30	UNKNOWN	28.3185840707965
1.1.1.28	pyruvate	Lactobacillus pentosus	320.5	31	37	6	-0.178669545346215	0.146781947421083	0.446637385001356	6	30	0	28.3185840707965
1.1.1.28	pyruvate	Pediococcus pentosaceus	320	31	37	6	-0.178669545346215	0.146781947421083	0.446637385001356	6	45	UNKNOWN	28.3185840707965
1.1.1.28	pyruvate	Pseudomonas aeruginosa	290	31	37	6	-0.178669545346215	0.146781947421083	0.446637385001356	6	30	UNKNOWN	28.3185840707965
1.1.1.28	pyruvate	Sporolactobacillus inulinus	512.2	31	37	6	-0.178669545346215	0.146781947421083	0.446637385001356	6	NA	UNKNOWN	28.3185840707965
1.1.1.282	l-quinate	Corynebacterium glutamicum	32.71	28	36	8	0.0716626712385756	0.902935493834217	0.0230670863680517	3	30	UNKNOWN	0.0773006134969325
1.1.1.282	l-quinate	Escherichia coli	0.0815	28	36	8	0.0716626712385756	0.902935493834217	0.0230670863680517	3	20	UNKNOWN	0.0773006134969325
1.1.1.282	l-quinate	Pseudomonas putida	0.0063	28	36	8	0.0716626712385756	0.902935493834217	0.0230670863680517	3	25	UNKNOWN	0.0773006134969325
1.1.1.282	nad+	Corynebacterium glutamicum	83.46	28	36	8	-0.185553866571149	0.657166728246139	0.263032650054956	3	30	UNKNOWN	13.3595238095238
1.1.1.282	nad+	Escherichia coli	0.105	28	36	8	-0.185553866571149	0.657166728246139	0.263032650054956	3	20	UNKNOWN	13.3595238095238
1.1.1.282	nad+	Pseudomonas putida	1.40275	28	36	8	-0.185553866571149	0.657166728246139	0.263032650054956	3	25	UNKNOWN	13.3595238095238
1.1.1.282	nadp+	Escherichia coli	0.0835	28	36	8	0.0724079743326745	NA	1	2	20	UNKNOWN	0.263473053892216
1.1.1.282	nadp+	Pseudomonas putida	0.022	28	36	8	0.0724079743326745	NA	1	2	25	UNKNOWN	0.263473053892216
1.1.1.282	shikimate	Corynebacterium glutamicum	30.13	28	36	8	-0.201161225763707	0.553827151957194	0.415850901524509	3	NA	UNKNOWN	21.5769230769231
1.1.1.282	shikimate	Escherichia coli	0.091	28	36	8	-0.201161225763707	0.553827151957194	0.415850901524509	3	20	UNKNOWN	21.5769230769231
1.1.1.282	shikimate	Pseudomonas putida	1.9635	28	36	8	-0.201161225763707	0.553827151957194	0.415850901524509	3	25	UNKNOWN	21.5769230769231
1.1.1.284	s-hydroxymethyl glutathione	Escherichia coli	156	28	36	8	0.0308954868471116	NA	1	2	NA	UNKNOWN	0.566025641025641
1.1.1.284	s-hydroxymethyl glutathione	Saccharomyces cerevisiae	88.3	28	36	8	0.0308954868471116	NA	1	2	NA	UNKNOWN	0.566025641025641
1.1.1.286	3-isopropylmalate	Deinococcus radiodurans	0.371	30	60	30	0.0370622442586847	NA	1	2	30	0	0.0772916666666667
1.1.1.286	3-isopropylmalate	Thermococcus kodakarensis	4.8	30	60	30	0.0370622442586847	NA	1	2	60	0	0.0772916666666667
1.1.1.286	homoisocitrate	Deinococcus radiodurans	46.2	30	95	65	-0.00535554236703492	0.552226375608249	0.129303244581715	5	30	0	3.37226277372263
1.1.1.286	homoisocitrate	Pyrococcus horikoshii	13.7	30	95	65	-0.00535554236703492	0.552226375608249	0.129303244581715	5	70	UNKNOWN	3.37226277372263
1.1.1.286	homoisocitrate	Sulfolobus acidocaldarius	37	30	95	65	-0.00535554236703492	0.552226375608249	0.129303244581715	5	60	UNKNOWN	3.37226277372263
1.1.1.286	homoisocitrate	Thermococcus kodakarensis	17	30	95	65	-0.00535554236703492	0.552226375608249	0.129303244581715	5	60	0	3.37226277372263
1.1.1.286	homoisocitrate	Thermus thermophilus	102	30	95	65	-0.00535554236703492	0.552226375608249	0.129303244581715	5	60	UNKNOWN	3.37226277372263
1.1.1.286	isocitrate	Deinococcus radiodurans	42.8	30	95	65	-0.0023305504376886	0.87234466872507	0.0100860526690312	5	30	0	2.89189189189189
1.1.1.286	isocitrate	Pyrococcus horikoshii	14.8	30	95	65	-0.0023305504376886	0.87234466872507	0.0100860526690312	5	70	UNKNOWN	2.89189189189189
1.1.1.286	isocitrate	Sulfolobus acidocaldarius	61	30	95	65	-0.0023305504376886	0.87234466872507	0.0100860526690312	5	60	UNKNOWN	2.89189189189189
1.1.1.286	isocitrate	Thermococcus kodakarensis	5	30	95	65	-0.0023305504376886	0.87234466872507	0.0100860526690312	5	60	0	2.89189189189189
1.1.1.286	isocitrate	Thermus thermophilus	123.5	30	95	65	-0.0023305504376886	0.87234466872507	0.0100860526690312	5	60	UNKNOWN	2.89189189189189
1.1.1.286	nad+	Deinococcus radiodurans	30.3	30	95	65	-0.00219978669073385	NA	1	2	30	UNKNOWN	1.38990825688073
1.1.1.286	nad+	Pyrococcus horikoshii	21.8	30	95	65	-0.00219978669073385	NA	1	2	70	UNKNOWN	1.38990825688073
1.1.1.30	(r)-3-hydroxybutanoate	Pseudomonas putida	907	28	31	3	-0.18948040089852	NA	1	2	NA	0	3.70204081632653
1.1.1.30	(r)-3-hydroxybutanoate	Ralstonia pickettii	245	28	31	3	-0.18948040089852	NA	1	2	30	UNKNOWN	3.70204081632653
1.1.1.30	acetoacetate	Alcaligenes faecalis	51.03	28	31	3	-0.0681907064341322	0.607725847724218	0.333996376390283	3	30	UNKNOWN	1.4904055145004
1.1.1.30	acetoacetate	Pseudomonas fragi	120	28	31	3	-0.0681907064341322	0.607725847724218	0.333996376390283	3	NA	0	1.4904055145004
1.1.1.30	acetoacetate	Ralstonia pickettii	110	28	31	3	-0.0681907064341322	0.607725847724218	0.333996376390283	3	NA	UNKNOWN	1.4904055145004
1.1.1.30	d-3-hydroxybutyrate	Pseudomonas fragi	340	28	31	3	-0.0133724077359938	NA	1	2	NA	UNKNOWN	1.09677419354839
1.1.1.30	d-3-hydroxybutyrate	Ralstonia pickettii	310	28	31	3	-0.0133724077359938	NA	1	2	NA	UNKNOWN	1.09677419354839
1.1.1.307	d-xylose	Candida tropicalis	240	25	36	11	-0.116425749383734	0.381477685059324	0.258738053805757	5	NA	UNKNOWN	169.014084507042
1.1.1.307	d-xylose	Neurospora crassa	3600	25	36	11	-0.116425749383734	0.381477685059324	0.258738053805757	5	25	UNKNOWN	169.014084507042
1.1.1.307	d-xylose	Rhizomucor pusillus	21.3	25	36	11	-0.116425749383734	0.381477685059324	0.258738053805757	5	30	UNKNOWN	169.014084507042
1.1.1.307	d-xylose	Saccharomyces cerevisiae	13	25	36	11	-0.116425749383734	0.381477685059324	0.258738053805757	5	25	0	169.014084507042
1.1.1.307	d-xylose	Scheffersomyces stipitis	21.45	25	36	11	-0.116425749383734	0.381477685059324	0.258738053805757	5	NA	0	169.014084507042
1.1.1.307	nadh	Neurospora crassa	310	25	26	1	-1.33754682948974	NA	1	2	25	UNKNOWN	21.7543859649123
1.1.1.307	nadh	Scheffersomyces stipitis	14.25	25	26	1	-1.33754682948974	NA	1	2	35	0	21.7543859649123
1.1.1.307	nadph	Neurospora crassa	3600	25	26	1	-2.02629501079124	NA	1	2	25	UNKNOWN	106.241699867198
1.1.1.307	nadph	Scheffersomyces stipitis	33.885	25	26	1	-2.02629501079124	NA	1	2	NA	0	106.241699867198
1.1.1.320	benzil	Bacillus cereus	1.07	25	30	5	0.176651148401394	NA	1	2	37	UNKNOWN	0.130841121495327
1.1.1.320	benzil	Ogataea glucozyma	0.14	25	30	5	0.176651148401394	NA	1	2	30	UNKNOWN	0.130841121495327
1.1.1.335	udp-2-acetamido-2-deoxy-alpha-d-glucuronate	Bordetella pertussis	0.0043	31	37	6	0.15085244559306	NA	1	2	25	UNKNOWN	0.124418604651163
1.1.1.335	udp-2-acetamido-2-deoxy-alpha-d-glucuronate	Chromobacterium violaceum	0.000535	31	37	6	0.15085244559306	NA	1	2	25	UNKNOWN	0.124418604651163
1.1.1.335	udp-alpha-d-glucuronate	Bordetella pertussis	0.0021	31	37	6	0.191021339279707	NA	1	2	25	UNKNOWN	0.0714285714285714
1.1.1.335	udp-alpha-d-glucuronate	Chromobacterium violaceum	0.00015	31	37	6	0.191021339279707	NA	1	2	25	UNKNOWN	0.0714285714285714
1.1.1.343	nad+	Moorella thermoacetica	12.6	58	75	17	0.0157050221122621	NA	1	2	50	0	0.540772532188841
1.1.1.343	nad+	Thermotoga maritima	23.3	58	75	17	0.0157050221122621	NA	1	2	70	0	0.540772532188841
1.1.1.363	nad+	Leuconostoc mesenteroides	1125	28	29	1	0.60867275338294	NA	1	2	25	0	0.246222222222222
1.1.1.363	nad+	Pseudomonas putida	277	28	29	1	0.60867275338294	NA	1	2	30	UNKNOWN	0.246222222222222
1.1.1.363	nadp+	Leuconostoc mesenteroides	522	28	29	1	0.709070331240352	NA	1	2	25	0	0.195402298850575
1.1.1.363	nadp+	Pseudomonas putida	102	28	29	1	0.709070331240352	NA	1	2	30	UNKNOWN	0.195402298850575
1.1.1.365	d-galacturonate	Aspergillus niger	6.165	24	26	2	0.75558973998946	NA	1	2	22	UNKNOWN	0.0308191403081914
1.1.1.365	d-galacturonate	Euglena gracilis	0.19	24	26	2	0.75558973998946	NA	1	2	25	UNKNOWN	0.0308191403081914
1.1.1.365	d-glucuronate	Aspergillus niger	1.62	24	26	2	0.465380706794901	NA	1	2	22	UNKNOWN	0.117283950617284
1.1.1.365	d-glucuronate	Euglena gracilis	0.19	24	26	2	0.465380706794901	NA	1	2	25	UNKNOWN	0.117283950617284
1.1.1.37	(s)-malate	Flavobacterium frigidimaris	65.8	22	37	15	0.0177686523148887	0.867066379595217	0.0109405029648202	5	10	UNKNOWN	0.217880794701987
1.1.1.37	(s)-malate	Methylomicrobium alcaliphilum	621	22	37	15	0.0177686523148887	0.867066379595217	0.0109405029648202	5	30	UNKNOWN	0.217880794701987
1.1.1.37	(s)-malate	Methylosinus trichosporium	1141	22	37	15	0.0177686523148887	0.867066379595217	0.0109405029648202	5	30	UNKNOWN	0.217880794701987
1.1.1.37	(s)-malate	Mycobacterium tuberculosis	302	22	37	15	0.0177686523148887	0.867066379595217	0.0109405029648202	5	NA	UNKNOWN	0.217880794701987
1.1.1.37	(s)-malate	Streptomyces coelicolor	4.71	22	37	15	0.0177686523148887	0.867066379595217	0.0109405029648202	5	30	UNKNOWN	0.217880794701987
1.1.1.37	nad+	Flavobacterium frigidimaris	48.6	22	37	15	0.0692424552142571	0.400685235464462	0.359178186990287	4	30	UNKNOWN	0.206808510638298
1.1.1.37	nad+	Mycobacterium tuberculosis	320	22	37	15	0.0692424552142571	0.400685235464462	0.359178186990287	4	NA	UNKNOWN	0.206808510638298
1.1.1.37	nad+	Plasmodium falciparum	150	22	37	15	0.0692424552142571	0.400685235464462	0.359178186990287	4	NA	UNKNOWN	0.206808510638298
1.1.1.37	nad+	Streptomyces coelicolor	3.66	22	37	15	0.0692424552142571	0.400685235464462	0.359178186990287	4	30	UNKNOWN	0.206808510638298
1.1.1.37	nadh	Mycobacterium tuberculosis	3330	28	37	9	0.0944097982412852	0.07906753215666	0.98465376237147	3	NA	UNKNOWN	0.139961265332473
1.1.1.37	nadh	Plasmodium falciparum	4415	28	37	9	0.0944097982412852	0.07906753215666	0.98465376237147	3	NA	UNKNOWN	0.139961265332473
1.1.1.37	nadh	Streptomyces coelicolor	542	28	37	9	0.0944097982412852	0.07906753215666	0.98465376237147	3	30	UNKNOWN	0.139961265332473
1.1.1.37	oxaloacetate	Escherichia coli	931	25	90	65	-0.0368544357205104	0.0402439182299557	0.427690510897496	10	30	0	6.7012987012987
1.1.1.37	oxaloacetate	Haloarcula marismortui	101.5	25	90	65	-0.0368544357205104	0.0402439182299557	0.427690510897496	10	NA	0	6.7012987012987
1.1.1.37	oxaloacetate	Methylomicrobium alcaliphilum	870	25	90	65	-0.0368544357205104	0.0402439182299557	0.427690510897496	10	30	UNKNOWN	6.7012987012987
1.1.1.37	oxaloacetate	Methylosinus trichosporium	516	25	90	65	-0.0368544357205104	0.0402439182299557	0.427690510897496	10	30	UNKNOWN	6.7012987012987
1.1.1.37	oxaloacetate	Mycobacterium tuberculosis	2437	25	90	65	-0.0368544357205104	0.0402439182299557	0.427690510897496	10	NA	UNKNOWN	6.7012987012987
1.1.1.37	oxaloacetate	Plasmodium falciparum	4765	25	90	65	-0.0368544357205104	0.0402439182299557	0.427690510897496	10	NA	UNKNOWN	6.7012987012987
1.1.1.37	oxaloacetate	Pyrobaculum calidifontis	77	25	90	65	-0.0368544357205104	0.0402439182299557	0.427690510897496	10	55	UNKNOWN	6.7012987012987
1.1.1.37	oxaloacetate	Streptomyces coelicolor	1870	25	90	65	-0.0368544357205104	0.0402439182299557	0.427690510897496	10	30	UNKNOWN	6.7012987012987
1.1.1.37	oxaloacetate	Sulfolobus acidocaldarius	2.62	25	90	65	-0.0368544357205104	0.0402439182299557	0.427690510897496	10	NA	UNKNOWN	6.7012987012987
1.1.1.37	oxaloacetate	Thermoplasma acidophilum	1.8	25	90	65	-0.0368544357205104	0.0402439182299557	0.427690510897496	10	NA	UNKNOWN	6.7012987012987
1.1.1.381	d-3-hydroxyisobutyrate	Escherichia coli	3.78	28	36	8	-0.0446889189520537	NA	1	2	30	UNKNOWN	2.27777777777778
1.1.1.381	d-3-hydroxyisobutyrate	Saccharomyces cerevisiae	8.61	28	36	8	-0.0446889189520537	NA	1	2	30	UNKNOWN	2.27777777777778
1.1.1.381	d-serine	Escherichia coli	3.5	28	36	8	-0.0437810022917704	NA	1	2	30	UNKNOWN	2.24
1.1.1.381	d-serine	Saccharomyces cerevisiae	7.84	28	36	8	-0.0437810022917704	NA	1	2	30	UNKNOWN	2.24
1.1.1.381	d-threonine	Escherichia coli	6.55	28	36	8	-0.113299077817754	NA	1	2	30	UNKNOWN	8.06106870229008
1.1.1.381	d-threonine	Saccharomyces cerevisiae	52.8	28	36	8	-0.113299077817754	NA	1	2	30	UNKNOWN	8.06106870229008
1.1.1.381	l-3-hydroxyisobutyrate	Escherichia coli	4.03	28	36	8	-0.0872363764099225	NA	1	2	30	UNKNOWN	4.98759305210918
1.1.1.381	l-3-hydroxyisobutyrate	Saccharomyces cerevisiae	20.1	28	36	8	-0.0872363764099225	NA	1	2	30	UNKNOWN	4.98759305210918
1.1.1.381	l-allo-threonine	Escherichia coli	5.76	28	36	8	-0.110131453385111	NA	1	2	30	UNKNOWN	7.60416666666667
1.1.1.381	l-allo-threonine	Saccharomyces cerevisiae	43.8	28	36	8	-0.110131453385111	NA	1	2	30	UNKNOWN	7.60416666666667
1.1.1.381	l-serine	Escherichia coli	4.2	28	36	8	-0.0522679243450406	NA	1	2	30	UNKNOWN	2.61904761904762
1.1.1.381	l-serine	Saccharomyces cerevisiae	11	28	36	8	-0.0522679243450406	NA	1	2	30	UNKNOWN	2.61904761904762
1.1.1.382	nadh	Archaeoglobus fulgidus	0.1	55	81	26	-0.0254906858339067	NA	1	2	NA	UNKNOWN	4.6
1.1.1.382	nadh	Thermacetogenium phaeum	0.46	55	81	26	-0.0254906858339067	NA	1	2	NA	UNKNOWN	4.6
1.1.1.383	nadh	Escherichia coli	0.3	36	92	56	-0.0227228249254944	0.00773808972282054	0.984583698586917	4	NA	0	15
1.1.1.383	nadh	Ignisphaera aggregans	0.02	36	92	56	-0.0227228249254944	0.00773808972282054	0.984583698586917	4	NA	UNKNOWN	15
1.1.1.383	nadh	Metallosphaera sedula	0.06	36	92	56	-0.0227228249254944	0.00773808972282054	0.984583698586917	4	NA	UNKNOWN	15
1.1.1.383	nadh	Slackia exigua	0.41	36	92	56	-0.0227228249254944	0.00773808972282054	0.984583698586917	4	NA	0	15
1.1.1.383	nadph	Escherichia coli	3.6	36	92	56	-0.0334761978367781	0.0599109352007874	0.883767449755058	4	NA	0	120
1.1.1.383	nadph	Ignisphaera aggregans	0.03	36	92	56	-0.0334761978367781	0.0599109352007874	0.883767449755058	4	NA	UNKNOWN	120
1.1.1.383	nadph	Metallosphaera sedula	0.07	36	92	56	-0.0334761978367781	0.0599109352007874	0.883767449755058	4	NA	UNKNOWN	120
1.1.1.383	nadph	Slackia exigua	0.8	36	92	56	-0.0334761978367781	0.0599109352007874	0.883767449755058	4	NA	0	120
1.1.1.4	(2r,3r)-butane-2,3-diol	Klebsiella pneumoniae	4.81	28	34	6	0.0084502178934433	NA	1	2	30	UNKNOWN	0.88981288981289
1.1.1.4	(2r,3r)-butane-2,3-diol	Rhodococcus erythropolis	4.28	28	34	6	0.0084502178934433	NA	1	2	55	UNKNOWN	0.88981288981289
1.1.1.4	acetoin	Clostridium autoethanogenum	145	36	37	1	2.18364439694613	NA	1	2	25	UNKNOWN	0.00655172413793103
1.1.1.4	acetoin	Escherichia coli	0.95	36	37	1	2.18364439694613	NA	1	2	NA	UNKNOWN	0.00655172413793103
1.1.1.40	(s)-malate	Trypanosoma brucei	687	26	30	4	0.0146109313301564	NA	1	2	NA	UNKNOWN	0.874090247452693
1.1.1.40	(s)-malate	Trypanosoma cruzi	600.5	26	30	4	0.0146109313301564	NA	1	2	NA	UNKNOWN	0.874090247452693
1.1.1.40	nadp+	Escherichia coli	66.6	26	60	34	-0.0389360991338773	0.137726195766935	0.743516113466562	4	NA	UNKNOWN	19.2122186495177
1.1.1.40	nadp+	Thermococcus kodakarensis	31.1	26	60	34	-0.0389360991338773	0.137726195766935	0.743516113466562	4	70	0	19.2122186495177
1.1.1.40	nadp+	Trypanosoma brucei	745	26	60	34	-0.0389360991338773	0.137726195766935	0.743516113466562	4	NA	UNKNOWN	19.2122186495177
1.1.1.40	nadp+	Trypanosoma cruzi	597.5	26	60	34	-0.0389360991338773	0.137726195766935	0.743516113466562	4	NA	UNKNOWN	19.2122186495177
1.1.1.40	pyruvate	Trypanosoma brucei	73.5	26	30	4	0.123114048502591	NA	1	2	NA	UNKNOWN	0.321768707482993
1.1.1.40	pyruvate	Trypanosoma cruzi	23.65	26	30	4	0.123114048502591	NA	1	2	NA	UNKNOWN	0.321768707482993
1.1.1.41	d-isocitrate	Azotobacter vinelandii	73	13	29	16	0.00647843846442658	NA	1	2	NA	UNKNOWN	0.787671232876712
1.1.1.41	d-isocitrate	Colwellia maris	57.5	13	29	16	0.00647843846442658	NA	1	2	NA	UNKNOWN	0.787671232876712
1.1.1.41	nad+	Acidithiobacillus thiooxidans	45.1	20	96	76	-0.00298118033486583	0.491646180896772	0.0820235669922648	8	30	0	1.44039735099338
1.1.1.41	nad+	Campylobacter curvus	10.8	20	96	76	-0.00298118033486583	0.491646180896772	0.0820235669922648	8	25	UNKNOWN	1.44039735099338
1.1.1.41	nad+	Congregibacter litoralis	60.7	20	96	76	-0.00298118033486583	0.491646180896772	0.0820235669922648	8	35	0	1.44039735099338
1.1.1.41	nad+	Ostreococcus tauri	87	20	96	76	-0.00298118033486583	0.491646180896772	0.0820235669922648	8	NA	0	1.44039735099338
1.1.1.41	nad+	Pyrococcus furiosus	60.4	20	96	76	-0.00298118033486583	0.491646180896772	0.0820235669922648	8	70	0	1.44039735099338
1.1.1.41	nad+	Pyrococcus horikoshii	21.8	20	96	76	-0.00298118033486583	0.491646180896772	0.0820235669922648	8	70	UNKNOWN	1.44039735099338
1.1.1.41	nad+	Streptococcus mutans	56	20	96	76	-0.00298118033486583	0.491646180896772	0.0820235669922648	8	37	0	1.44039735099338
1.1.1.41	nad+	Zymomonas mobilis	100	20	96	76	-0.00298118033486583	0.491646180896772	0.0820235669922648	8	37	UNKNOWN	1.44039735099338
1.1.1.41	nadp+	Acidithiobacillus thiooxidans	21.3	13	96	83	0.00438614539004792	0.653048723929028	0.0436388941004062	7	30	0	0.659139784946236
1.1.1.41	nadp+	Azotobacter vinelandii	92.6	13	96	83	0.00438614539004792	0.653048723929028	0.0436388941004062	7	NA	UNKNOWN	0.659139784946236
1.1.1.41	nadp+	Campylobacter curvus	2	13	96	83	0.00438614539004792	0.653048723929028	0.0436388941004062	7	25	UNKNOWN	0.659139784946236
1.1.1.41	nadp+	Colwellia maris	61.3	13	96	83	0.00438614539004792	0.653048723929028	0.0436388941004062	7	NA	UNKNOWN	0.659139784946236
1.1.1.41	nadp+	Ostreococcus tauri	31.5	13	96	83	0.00438614539004792	0.653048723929028	0.0436388941004062	7	NA	0	0.659139784946236
1.1.1.41	nadp+	Pyrococcus furiosus	93	13	96	83	0.00438614539004792	0.653048723929028	0.0436388941004062	7	70	0	0.659139784946236
1.1.1.41	nadp+	Zymomonas mobilis	19.5	13	96	83	0.00438614539004792	0.653048723929028	0.0436388941004062	7	37	UNKNOWN	0.659139784946236
1.1.1.411	l-threonate	Cupriavidus necator	15.6	27	29	2	-0.137241753614587	NA	1	2	25	UNKNOWN	1.88141025641026
1.1.1.411	l-threonate	Pectobacterium atrosepticum	29.35	27	29	2	-0.137241753614587	NA	1	2	25	UNKNOWN	1.88141025641026
1.1.1.42	dl-isocitrate	Haloferax volcanii	0.0023	19	37	18	-0.109990649236001	0.625148130144388	0.308443334141842	3	30	0	2.87368421052632
1.1.1.42	dl-isocitrate	Microcystis aeruginosa	10.92	19	37	18	-0.109990649236001	0.625148130144388	0.308443334141842	3	50	UNKNOWN	2.87368421052632
1.1.1.42	dl-isocitrate	Mycobacterium tuberculosis	3.8	19	37	18	-0.109990649236001	0.625148130144388	0.308443334141842	3	25	UNKNOWN	2.87368421052632
1.1.1.42	isocitrate	Archaeoglobus fulgidus	255	8	81	73	0.0154898301474793	0.0934103935530266	0.821904714517678	4	60	UNKNOWN	0.0703921568627451
1.1.1.42	isocitrate	Desulfotalea psychrophila	17.95	8	81	73	0.0154898301474793	0.0934103935530266	0.821904714517678	4	5	UNKNOWN	0.0703921568627451
1.1.1.42	isocitrate	Escherichia coli	106.4	8	81	73	0.0154898301474793	0.0934103935530266	0.821904714517678	4	40	UNKNOWN	0.0703921568627451
1.1.1.42	isocitrate	Mycobacterium tuberculosis	33	8	81	73	0.0154898301474793	0.0934103935530266	0.821904714517678	4	NA	UNKNOWN	0.0703921568627451
1.1.1.42	nadp+	Archaeoglobus fulgidus	219	8	81	73	0.0112066394405803	0.691821123799228	0.0238103324768109	9	60	UNKNOWN	0.0819634703196347
1.1.1.42	nadp+	Desulfotalea psychrophila	17.95	8	81	73	0.0112066394405803	0.691821123799228	0.0238103324768109	9	5	UNKNOWN	0.0819634703196347
1.1.1.42	nadp+	Escherichia coli	88.1	8	81	73	0.0112066394405803	0.691821123799228	0.0238103324768109	9	40	UNKNOWN	0.0819634703196347
1.1.1.42	nadp+	Haloferax volcanii	0.003	8	81	73	0.0112066394405803	0.691821123799228	0.0238103324768109	9	30	0	0.0819634703196347
1.1.1.42	nadp+	Microcystis aeruginosa	37.12	8	81	73	0.0112066394405803	0.691821123799228	0.0238103324768109	9	50	UNKNOWN	0.0819634703196347
1.1.1.42	nadp+	Mycobacterium tuberculosis	33	8	81	73	0.0112066394405803	0.691821123799228	0.0238103324768109	9	25	UNKNOWN	0.0819634703196347
1.1.1.42	nadp+	Plasmodium falciparum	138	8	81	73	0.0112066394405803	0.691821123799228	0.0238103324768109	9	30	UNKNOWN	0.0819634703196347
1.1.1.42	nadp+	Streptomyces lividans	25.4	8	81	73	0.0112066394405803	0.691821123799228	0.0238103324768109	9	25	UNKNOWN	0.0819634703196347
1.1.1.42	nadp+	Yarrowia lipolytica	72	8	81	73	0.0112066394405803	0.691821123799228	0.0238103324768109	9	25	0	0.0819634703196347
1.1.1.44	6-phospho-d-gluconate	Geobacillus stearothermophilus	22.1	54	75	21	0.0555948136806554	NA	1	2	25	UNKNOWN	0.068
1.1.1.44	6-phospho-d-gluconate	Thermotoga maritima	325	54	75	21	0.0555948136806554	NA	1	2	80	UNKNOWN	0.068
1.1.1.44	6-phosphono-d-gluconate	Trypanosoma brucei	31.8	26	30	4	-0.122199738927015	NA	1	2	20	UNKNOWN	3.08176100628931
1.1.1.44	6-phosphono-d-gluconate	Trypanosoma cruzi	98	26	30	4	-0.122199738927015	NA	1	2	30	0	3.08176100628931
1.1.1.44	nad+	Moorella thermoacetica	12.6	58	75	17	0.0157050221122621	NA	1	2	50	0	0.540772532188841
1.1.1.44	nad+	Thermotoga maritima	23.3	58	75	17	0.0157050221122621	NA	1	2	70	0	0.540772532188841
1.1.1.44	nadp+	Geobacillus stearothermophilus	22.1	26	75	49	-0.000160303576391805	0.994497240459415	3.02803625614972e-05	4	25	UNKNOWN	0.57209573847052
1.1.1.44	nadp+	Moorella thermoacetica	8.73	26	75	49	-0.000160303576391805	0.994497240459415	3.02803625614972e-05	4	50	0	0.57209573847052
1.1.1.44	nadp+	Thermotoga maritima	171.3	26	75	49	-0.000160303576391805	0.994497240459415	3.02803625614972e-05	4	70	0	0.57209573847052
1.1.1.44	nadp+	Trypanosoma cruzi	98	26	75	49	-0.000160303576391805	0.994497240459415	3.02803625614972e-05	4	30	0	0.57209573847052
1.1.1.47	d-glucose	Bacillus amyloliquefaciens	70	30	31	1	-0.745966567012248	NA	1	2	37	UNKNOWN	5.57142857142857
1.1.1.47	d-glucose	Bacillus megaterium	390	30	31	1	-0.745966567012248	NA	1	2	NA	UNKNOWN	5.57142857142857
1.1.1.47	nad+	Bacillus megaterium	390	30	33	3	-0.712305941954745	0.57458077576655	0.383917740158563	3	NA	0	2506.68269230769
1.1.1.47	nad+	Bacillus subtilis	521000	30	33	3	-0.712305941954745	0.57458077576655	0.383917740158563	3	25	UNKNOWN	2506.68269230769
1.1.1.47	nad+	Lysinibacillus sphaericus	104	30	33	3	-0.712305941954745	0.57458077576655	0.383917740158563	3	25	UNKNOWN	2506.68269230769
1.1.1.47	nadp+	Bacillus megaterium	260	30	33	3	-0.14883013313896	NA	1	2	NA	0	2.79569892473118
1.1.1.47	nadp+	Lysinibacillus sphaericus	93	30	33	3	-0.14883013313896	NA	1	2	25	UNKNOWN	2.79569892473118
1.1.1.48	d-galactose	Pelomonas saccharophila	358	28	30	2	-0.258999490331127	NA	1	2	NA	UNKNOWN	3.29608938547486
1.1.1.48	d-galactose	Pseudomonas fluorescens	1180	28	30	2	-0.258999490331127	NA	1	2	NA	UNKNOWN	3.29608938547486
1.1.1.49	d-glucose 6-phosphate	Aspergillus aculeatus	83	25	75	50	0.0396572500016242	0.0235400792590566	0.858846062949838	5	NA	UNKNOWN	0.0150285714285714
1.1.1.49	d-glucose 6-phosphate	Leishmania mexicana	22.2	25	75	50	0.0396572500016242	0.0235400792590566	0.858846062949838	5	NA	UNKNOWN	0.0150285714285714
1.1.1.49	d-glucose 6-phosphate	Thermotoga maritima	3500	25	75	50	0.0396572500016242	0.0235400792590566	0.858846062949838	5	80	UNKNOWN	0.0150285714285714
1.1.1.49	d-glucose 6-phosphate	Trypanosoma brucei	16.4	25	75	50	0.0396572500016242	0.0235400792590566	0.858846062949838	5	NA	UNKNOWN	0.0150285714285714
1.1.1.49	d-glucose 6-phosphate	Trypanosoma cruzi	59.55	25	75	50	0.0396572500016242	0.0235400792590566	0.858846062949838	5	NA	UNKNOWN	0.0150285714285714
1.1.1.49	nad+	Escherichia coli	288	28	75	47	0.00332768952319534	0.853865820996126	0.0517728406527444	3	25	UNKNOWN	1.25454545454545
1.1.1.49	nad+	Pseudomonas fluorescens	1380	28	75	47	0.00332768952319534	0.853865820996126	0.0517728406527444	3	NA	UNKNOWN	1.25454545454545
1.1.1.49	nad+	Thermotoga maritima	1100	28	75	47	0.00332768952319534	0.853865820996126	0.0517728406527444	3	80	UNKNOWN	1.25454545454545
1.1.1.49	nadp+	Escherichia coli	174	26	75	49	0.0262125563756327	0.264121330833056	0.541517415734912	4	25	UNKNOWN	0.0148571428571429
1.1.1.49	nadp+	Pseudomonas fluorescens	1120	26	75	49	0.0262125563756327	0.264121330833056	0.541517415734912	4	NA	UNKNOWN	0.0148571428571429
1.1.1.49	nadp+	Thermotoga maritima	3500	26	75	49	0.0262125563756327	0.264121330833056	0.541517415734912	4	80	UNKNOWN	0.0148571428571429
1.1.1.49	nadp+	Trypanosoma cruzi	52	26	75	49	0.0262125563756327	0.264121330833056	0.541517415734912	4	25	0	0.0148571428571429
1.1.1.53	progesterone	Mycobacterium tuberculosis	72	28	37	9	0.114800740279413	NA	1	2	30	UNKNOWN	0.0926388888888889
1.1.1.53	progesterone	Streptomyces exfoliatus	6.67	28	37	9	0.114800740279413	NA	1	2	NA	UNKNOWN	0.0926388888888889
1.1.1.56	ribitol	Klebsiella aerogenes	299	35	36	1	1.47567118832445	NA	1	2	NA	UNKNOWN	0.0334448160535117
1.1.1.56	ribitol	Providencia alcalifaciens	10	35	36	1	1.47567118832445	NA	1	2	35	UNKNOWN	0.0334448160535117
1.1.1.59	3-hydroxypropanoate	Bacillus cereus	0.21	26	30	4	-0.542180477655717	NA	1	2	37	UNKNOWN	147.47619047619
1.1.1.59	3-hydroxypropanoate	Candida albicans	30.97	26	30	4	-0.542180477655717	NA	1	2	22	UNKNOWN	147.47619047619
1.1.1.6	1,3-butanediol	Escherichia coli	3.3	34	36	2	0.0299827520238098	0.572581112639253	0.386975249402428	3	30	0	0.866666666666667
1.1.1.6	1,3-butanediol	Klebsiella pneumoniae	2.6	34	36	2	0.0299827520238098	0.572581112639253	0.386975249402428	3	30	UNKNOWN	0.866666666666667
1.1.1.6	1,3-butanediol	Salmonella enterica	2.7	34	36	2	0.0299827520238098	0.572581112639253	0.386975249402428	3	30	UNKNOWN	0.866666666666667
1.1.1.6	glycerol	Klebsiella pneumoniae	2.71	34	56	22	-0.00711397666823461	NA	1	2	30	UNKNOWN	1.43386243386243
1.1.1.6	glycerol	Thermoanaerobacterium thermosaccharolyticum	1.89	34	56	22	-0.00711397666823461	NA	1	2	60	UNKNOWN	1.43386243386243
1.1.1.67	d-fructose	Aspergillus fumigatus	86	26	79	53	0.00912183774932191	0.358087475598581	0.715604055762324	3	25	UNKNOWN	0.477777777777778
1.1.1.67	d-fructose	Pseudomonas fluorescens	40.5	26	79	53	0.00912183774932191	0.358087475598581	0.715604055762324	3	NA	UNKNOWN	0.477777777777778
1.1.1.67	d-fructose	Thermotoga neapolitana	180	26	79	53	0.00912183774932191	0.358087475598581	0.715604055762324	3	90	UNKNOWN	0.477777777777778
1.1.1.67	d-mannitol	Aspergillus fumigatus	212	26	28	2	-0.56246936830415	NA	1	2	25	UNKNOWN	13.3333333333333
1.1.1.67	d-mannitol	Pseudomonas fluorescens	15.9	26	28	2	-0.56246936830415	NA	1	2	25	0	13.3333333333333
1.1.1.71	butan-1-ol	Acinetobacter calcoaceticus	38.3	28	33	5	-0.0241903485742355	NA	1	2	NA	UNKNOWN	1.32114882506527
1.1.1.71	butan-1-ol	Saccharomyces cerevisiae	50.6	28	33	5	-0.0241903485742355	NA	1	2	NA	UNKNOWN	1.32114882506527
1.1.1.71	butanal	Acinetobacter calcoaceticus	26.3	28	33	5	0.0255399354266563	NA	1	2	NA	UNKNOWN	0.745247148288973
1.1.1.71	butanal	Saccharomyces cerevisiae	19.6	28	33	5	0.0255399354266563	NA	1	2	NA	UNKNOWN	0.745247148288973
1.1.1.71	ethanol	Acinetobacter calcoaceticus	13.9	28	33	5	-0.0804584632423459	NA	1	2	NA	UNKNOWN	2.52517985611511
1.1.1.71	ethanol	Saccharomyces cerevisiae	35.1	28	33	5	-0.0804584632423459	NA	1	2	NA	UNKNOWN	2.52517985611511
1.1.1.71	hexan-1-ol	Acinetobacter calcoaceticus	39.4	28	33	5	-0.00196176486310708	NA	1	2	NA	UNKNOWN	1.02284263959391
1.1.1.71	hexan-1-ol	Saccharomyces cerevisiae	40.3	28	33	5	-0.00196176486310708	NA	1	2	NA	UNKNOWN	1.02284263959391
1.1.1.71	nadp+	Thermococcus kodakarensis	20.25	60	81	21	-0.0578456223788097	NA	1	2	70	UNKNOWN	16.3967611336032
1.1.1.71	nadp+	Thermococcus sibiricus	1.235	60	81	21	-0.0578456223788097	NA	1	2	60	UNKNOWN	16.3967611336032
1.1.1.71	nadph	Thermococcus kodakarensis	17.3	60	81	21	-0.0504318645636012	NA	1	2	70	UNKNOWN	11.4569536423841
1.1.1.71	nadph	Thermococcus sibiricus	1.51	60	81	21	-0.0504318645636012	NA	1	2	60	UNKNOWN	11.4569536423841
1.1.1.71	octan-1-ol	Acinetobacter calcoaceticus	25.4	28	33	5	-0.03900987109075	NA	1	2	NA	UNKNOWN	1.56692913385827
1.1.1.71	octan-1-ol	Saccharomyces cerevisiae	39.8	28	33	5	-0.03900987109075	NA	1	2	NA	UNKNOWN	1.56692913385827
1.1.1.71	pentan-1-ol	Acinetobacter calcoaceticus	44.7	28	33	5	-0.0296686244626665	NA	1	2	NA	UNKNOWN	1.40715883668904
1.1.1.71	pentan-1-ol	Saccharomyces cerevisiae	62.9	28	33	5	-0.0296686244626665	NA	1	2	NA	UNKNOWN	1.40715883668904
1.1.1.81	hydroxypyruvate	Pyrococcus furiosus	5.6	95	96	1	0.341647846572256	NA	1	2	50	UNKNOWN	0.455357142857143
1.1.1.81	hydroxypyruvate	Pyrococcus horikoshii	2.55	95	96	1	0.341647846572256	NA	1	2	50	UNKNOWN	0.455357142857143
1.1.1.85	(2r,3s)-3-isopropylmalate	Acidithiobacillus ferrooxidans	28	5	71	66	-0.0066080663055491	0.218471633472319	0.445330933733352	5	NA	UNKNOWN	2.17472815898013
1.1.1.85	(2r,3s)-3-isopropylmalate	Shewanella benthica	14.5	5	71	66	-0.0066080663055491	0.218471633472319	0.445330933733352	5	20	UNKNOWN	2.17472815898013
1.1.1.85	(2r,3s)-3-isopropylmalate	Shewanella oneidensis	8.4	5	71	66	-0.0066080663055491	0.218471633472319	0.445330933733352	5	20	UNKNOWN	2.17472815898013
1.1.1.85	(2r,3s)-3-isopropylmalate	Sulfolobus acidocaldarius	8.5	5	71	66	-0.0066080663055491	0.218471633472319	0.445330933733352	5	60	UNKNOWN	2.17472815898013
1.1.1.85	(2r,3s)-3-isopropylmalate	Thermus thermophilus	4.835	5	71	66	-0.0066080663055491	0.218471633472319	0.445330933733352	5	37	0	2.17472815898013
1.1.1.85	isopropylmalate	Escherichia coli	69	36	71	35	-0.0530450816485053	NA	1	2	40	UNKNOWN	71.875
1.1.1.85	isopropylmalate	Thermus thermophilus	0.96	36	71	35	-0.0530450816485053	NA	1	2	21	0	71.875
1.1.1.85	malate	Acidithiobacillus ferrooxidans	5	28	71	43	0.00428854617237954	NA	1	2	NA	UNKNOWN	0.65402223675605
1.1.1.85	malate	Thermus thermophilus	7.645	28	71	43	0.00428854617237954	NA	1	2	21	0	0.65402223675605
1.1.1.85	nad+	Escherichia coli	69	5	71	66	-0.00285560055221106	0.766432146722111	0.0545539420848414	4	40	UNKNOWN	1.55833333333333
1.1.1.85	nad+	Shewanella benthica	18.7	5	71	66	-0.00285560055221106	0.766432146722111	0.0545539420848414	4	25	0	1.55833333333333
1.1.1.85	nad+	Shewanella oneidensis	17.1	5	71	66	-0.00285560055221106	0.766432146722111	0.0545539420848414	4	25	0	1.55833333333333
1.1.1.85	nad+	Thermus thermophilus	12	5	71	66	-0.00285560055221106	0.766432146722111	0.0545539420848414	4	21	0	1.55833333333333
1.1.1.86	(s)-2-acetolactate	Meiothermus ruber	0.93	37	56	19	-0.00934974142759489	NA	1	2	50	0	1.50537634408602
1.1.1.86	(s)-2-acetolactate	Mycobacterium tuberculosis	1.4	37	56	19	-0.00934974142759489	NA	1	2	37	UNKNOWN	1.50537634408602
1.1.1.86	2-hydroxy-2-ethyl-3-oxobutanoate	Corynebacterium glutamicum	0.9	26	36	10	0.0992213574987488	0.0281720155412758	0.52078600318391	9	25	UNKNOWN	0.0685714285714286
1.1.1.86	2-hydroxy-2-ethyl-3-oxobutanoate	Escherichia coli	3.5	26	36	10	0.0992213574987488	0.0281720155412758	0.52078600318391	9	25	UNKNOWN	0.0685714285714286
1.1.1.86	2-hydroxy-2-ethyl-3-oxobutanoate	Streptomyces ambofaciens	1.3	26	36	10	0.0992213574987488	0.0281720155412758	0.52078600318391	9	25	UNKNOWN	0.0685714285714286
1.1.1.86	2-hydroxy-2-ethyl-3-oxobutanoate	Streptomyces avermitilis	0.4	26	36	10	0.0992213574987488	0.0281720155412758	0.52078600318391	9	25	UNKNOWN	0.0685714285714286
1.1.1.86	2-hydroxy-2-ethyl-3-oxobutanoate	Streptomyces coelicolor	1.795	26	36	10	0.0992213574987488	0.0281720155412758	0.52078600318391	9	25	UNKNOWN	0.0685714285714286
1.1.1.86	2-hydroxy-2-ethyl-3-oxobutanoate	Streptomyces griseus	0.44	26	36	10	0.0992213574987488	0.0281720155412758	0.52078600318391	9	25	UNKNOWN	0.0685714285714286
1.1.1.86	2-hydroxy-2-ethyl-3-oxobutanoate	Streptomyces lividans	1.86	26	36	10	0.0992213574987488	0.0281720155412758	0.52078600318391	9	25	UNKNOWN	0.0685714285714286
1.1.1.86	2-hydroxy-2-ethyl-3-oxobutanoate	Streptomyces pristinaespiralis	0.18	26	36	10	0.0992213574987488	0.0281720155412758	0.52078600318391	9	25	UNKNOWN	0.0685714285714286
1.1.1.86	2-hydroxy-2-ethyl-3-oxobutanoate	Streptomyces viridifaciens	0.3	26	36	10	0.0992213574987488	0.0281720155412758	0.52078600318391	9	25	UNKNOWN	0.0685714285714286
1.1.1.86	2-hydroxy-2-methyl-3-oxobutanoate	Corynebacterium glutamicum	3.2	26	36	10	0.036415692853321	0.48539697596418	0.0719092003819102	9	25	UNKNOWN	1.4
1.1.1.86	2-hydroxy-2-methyl-3-oxobutanoate	Escherichia coli	2	26	36	10	0.036415692853321	0.48539697596418	0.0719092003819102	9	25	UNKNOWN	1.4
1.1.1.86	2-hydroxy-2-methyl-3-oxobutanoate	Streptomyces ambofaciens	0.63	26	36	10	0.036415692853321	0.48539697596418	0.0719092003819102	9	25	UNKNOWN	1.4
1.1.1.86	2-hydroxy-2-methyl-3-oxobutanoate	Streptomyces avermitilis	0.24	26	36	10	0.036415692853321	0.48539697596418	0.0719092003819102	9	25	UNKNOWN	1.4
1.1.1.86	2-hydroxy-2-methyl-3-oxobutanoate	Streptomyces coelicolor	0.67	26	36	10	0.036415692853321	0.48539697596418	0.0719092003819102	9	25	UNKNOWN	1.4
1.1.1.86	2-hydroxy-2-methyl-3-oxobutanoate	Streptomyces griseus	0.42	26	36	10	0.036415692853321	0.48539697596418	0.0719092003819102	9	25	UNKNOWN	1.4
1.1.1.86	2-hydroxy-2-methyl-3-oxobutanoate	Streptomyces lividans	0.49	26	36	10	0.036415692853321	0.48539697596418	0.0719092003819102	9	25	UNKNOWN	1.4
1.1.1.86	2-hydroxy-2-methyl-3-oxobutanoate	Streptomyces pristinaespiralis	3.6	26	36	10	0.036415692853321	0.48539697596418	0.0719092003819102	9	25	UNKNOWN	1.4
1.1.1.86	2-hydroxy-2-methyl-3-oxobutanoate	Streptomyces viridifaciens	2	26	36	10	0.036415692853321	0.48539697596418	0.0719092003819102	9	25	UNKNOWN	1.4
1.1.1.86	2-methylacetoacetate	Corynebacterium glutamicum	0.4	26	31	5	-0.148326302416435	0.00189945412504187	0.821846567851925	8	25	UNKNOWN	5
1.1.1.86	2-methylacetoacetate	Streptomyces ambofaciens	1.2	26	31	5	-0.148326302416435	0.00189945412504187	0.821846567851925	8	25	UNKNOWN	5
1.1.1.86	2-methylacetoacetate	Streptomyces avermitilis	1.8	26	31	5	-0.148326302416435	0.00189945412504187	0.821846567851925	8	25	UNKNOWN	5
1.1.1.86	2-methylacetoacetate	Streptomyces coelicolor	0.8	26	31	5	-0.148326302416435	0.00189945412504187	0.821846567851925	8	25	UNKNOWN	5
1.1.1.86	2-methylacetoacetate	Streptomyces griseus	1.05	26	31	5	-0.148326302416435	0.00189945412504187	0.821846567851925	8	25	UNKNOWN	5
1.1.1.86	2-methylacetoacetate	Streptomyces lividans	0.585	26	31	5	-0.148326302416435	0.00189945412504187	0.821846567851925	8	25	UNKNOWN	5
1.1.1.86	2-methylacetoacetate	Streptomyces pristinaespiralis	2	26	31	5	-0.148326302416435	0.00189945412504187	0.821846567851925	8	25	UNKNOWN	5
1.1.1.86	2-methylacetoacetate	Streptomyces viridifaciens	2	26	31	5	-0.148326302416435	0.00189945412504187	0.821846567851925	8	25	UNKNOWN	5
1.1.1.86	3-hydroxy-3-ethyl-2-oxobutanoate	Corynebacterium glutamicum	0.18	26	36	10	0.0386613474889334	0.373146730575931	0.114475871737728	9	25	UNKNOWN	0.25
1.1.1.86	3-hydroxy-3-ethyl-2-oxobutanoate	Escherichia coli	3.8	26	36	10	0.0386613474889334	0.373146730575931	0.114475871737728	9	25	UNKNOWN	0.25
1.1.1.86	3-hydroxy-3-ethyl-2-oxobutanoate	Streptomyces ambofaciens	0.9	26	36	10	0.0386613474889334	0.373146730575931	0.114475871737728	9	25	UNKNOWN	0.25
1.1.1.86	3-hydroxy-3-ethyl-2-oxobutanoate	Streptomyces avermitilis	0.8	26	36	10	0.0386613474889334	0.373146730575931	0.114475871737728	9	25	UNKNOWN	0.25
1.1.1.86	3-hydroxy-3-ethyl-2-oxobutanoate	Streptomyces coelicolor	1.3	26	36	10	0.0386613474889334	0.373146730575931	0.114475871737728	9	25	UNKNOWN	0.25
1.1.1.86	3-hydroxy-3-ethyl-2-oxobutanoate	Streptomyces griseus	1	26	36	10	0.0386613474889334	0.373146730575931	0.114475871737728	9	25	UNKNOWN	0.25
1.1.1.86	3-hydroxy-3-ethyl-2-oxobutanoate	Streptomyces lividans	1.1	26	36	10	0.0386613474889334	0.373146730575931	0.114475871737728	9	25	UNKNOWN	0.25
1.1.1.86	3-hydroxy-3-ethyl-2-oxobutanoate	Streptomyces pristinaespiralis	1.4	26	36	10	0.0386613474889334	0.373146730575931	0.114475871737728	9	25	UNKNOWN	0.25
1.1.1.86	3-hydroxy-3-ethyl-2-oxobutanoate	Streptomyces viridifaciens	0.5	26	36	10	0.0386613474889334	0.373146730575931	0.114475871737728	9	25	UNKNOWN	0.25
1.1.1.86	3-hydroxy-3-methyl-2-oxobutanoate	Corynebacterium glutamicum	0.9	26	36	10	0.00588043507586568	0.882607585002997	0.00333915486074469	9	25	UNKNOWN	1.24193548387097
1.1.1.86	3-hydroxy-3-methyl-2-oxobutanoate	Escherichia coli	3.1	26	36	10	0.00588043507586568	0.882607585002997	0.00333915486074469	9	25	UNKNOWN	1.24193548387097
1.1.1.86	3-hydroxy-3-methyl-2-oxobutanoate	Streptomyces ambofaciens	0.8	26	36	10	0.00588043507586568	0.882607585002997	0.00333915486074469	9	25	UNKNOWN	1.24193548387097
1.1.1.86	3-hydroxy-3-methyl-2-oxobutanoate	Streptomyces avermitilis	1.2	26	36	10	0.00588043507586568	0.882607585002997	0.00333915486074469	9	25	UNKNOWN	1.24193548387097
1.1.1.86	3-hydroxy-3-methyl-2-oxobutanoate	Streptomyces coelicolor	1.25	26	36	10	0.00588043507586568	0.882607585002997	0.00333915486074469	9	25	UNKNOWN	1.24193548387097
1.1.1.86	3-hydroxy-3-methyl-2-oxobutanoate	Streptomyces griseus	0.5	26	36	10	0.00588043507586568	0.882607585002997	0.00333915486074469	9	25	UNKNOWN	1.24193548387097
1.1.1.86	3-hydroxy-3-methyl-2-oxobutanoate	Streptomyces lividans	1.6	26	36	10	0.00588043507586568	0.882607585002997	0.00333915486074469	9	25	UNKNOWN	1.24193548387097
1.1.1.86	3-hydroxy-3-methyl-2-oxobutanoate	Streptomyces pristinaespiralis	5.2	26	36	10	0.00588043507586568	0.882607585002997	0.00333915486074469	9	25	UNKNOWN	1.24193548387097
1.1.1.86	3-hydroxy-3-methyl-2-oxobutanoate	Streptomyces viridifaciens	2.5	26	36	10	0.00588043507586568	0.882607585002997	0.00333915486074469	9	25	UNKNOWN	1.24193548387097
1.1.1.86	3-hydroxypyruvate	Escherichia coli	15.688	36	37	1	-0.0986575676516702	NA	1	2	37	UNKNOWN	1.25504
1.1.1.86	3-hydroxypyruvate	Mycobacterium tuberculosis	12.5	36	37	1	-0.0986575676516702	NA	1	2	37	UNKNOWN	1.25504
1.1.1.86	hydroxypyruvate	Corynebacterium glutamicum	0.5	26	31	5	-0.133010579521621	0.0194558672043982	0.625316739550692	8	25	UNKNOWN	4
1.1.1.86	hydroxypyruvate	Streptomyces ambofaciens	1	26	31	5	-0.133010579521621	0.0194558672043982	0.625316739550692	8	25	UNKNOWN	4
1.1.1.86	hydroxypyruvate	Streptomyces avermitilis	2	26	31	5	-0.133010579521621	0.0194558672043982	0.625316739550692	8	25	UNKNOWN	4
1.1.1.86	hydroxypyruvate	Streptomyces coelicolor	0.5	26	31	5	-0.133010579521621	0.0194558672043982	0.625316739550692	8	25	UNKNOWN	4
1.1.1.86	hydroxypyruvate	Streptomyces griseus	1.5	26	31	5	-0.133010579521621	0.0194558672043982	0.625316739550692	8	25	UNKNOWN	4
1.1.1.86	hydroxypyruvate	Streptomyces lividans	0.7	26	31	5	-0.133010579521621	0.0194558672043982	0.625316739550692	8	25	UNKNOWN	4
1.1.1.86	hydroxypyruvate	Streptomyces pristinaespiralis	2	26	31	5	-0.133010579521621	0.0194558672043982	0.625316739550692	8	25	UNKNOWN	4
1.1.1.86	hydroxypyruvate	Streptomyces viridifaciens	2	26	31	5	-0.133010579521621	0.0194558672043982	0.625316739550692	8	25	UNKNOWN	4
1.1.1.86	nadh	Escherichia coli	0.00183	36	38	2	1.10733508249461	NA	1	2	NA	0	0.0061
1.1.1.86	nadh	Methanococcus aeolicus	0.3	36	38	2	1.10733508249461	NA	1	2	NA	0	0.0061
1.1.1.86	nadph	Escherichia coli	0.12	36	56	20	0.0307733994821964	0.51348374232503	0.478826120831816	3	22	0	0.122448979591837
1.1.1.86	nadph	Meiothermus ruber	0.98	36	56	20	0.0307733994821964	0.51348374232503	0.478826120831816	3	50	0	0.122448979591837
1.1.1.86	nadph	Methanococcus aeolicus	0.7	36	56	20	0.0307733994821964	0.51348374232503	0.478826120831816	3	NA	0	0.122448979591837
1.1.1.86	pyruvate	Corynebacterium glutamicum	8.6	26	36	10	-0.201845431200983	0.0126611815820126	0.612445082906415	9	25	UNKNOWN	207.142857142857
1.1.1.86	pyruvate	Escherichia coli	0.021	26	36	10	-0.201845431200983	0.0126611815820126	0.612445082906415	9	37	UNKNOWN	207.142857142857
1.1.1.86	pyruvate	Streptomyces ambofaciens	6.3	26	36	10	-0.201845431200983	0.0126611815820126	0.612445082906415	9	25	UNKNOWN	207.142857142857
1.1.1.86	pyruvate	Streptomyces avermitilis	3.6	26	36	10	-0.201845431200983	0.0126611815820126	0.612445082906415	9	25	UNKNOWN	207.142857142857
1.1.1.86	pyruvate	Streptomyces coelicolor	4.2	26	36	10	-0.201845431200983	0.0126611815820126	0.612445082906415	9	25	UNKNOWN	207.142857142857
1.1.1.86	pyruvate	Streptomyces griseus	1	26	36	10	-0.201845431200983	0.0126611815820126	0.612445082906415	9	25	UNKNOWN	207.142857142857
1.1.1.86	pyruvate	Streptomyces lividans	4.85	26	36	10	-0.201845431200983	0.0126611815820126	0.612445082906415	9	25	UNKNOWN	207.142857142857
1.1.1.86	pyruvate	Streptomyces pristinaespiralis	3	26	36	10	-0.201845431200983	0.0126611815820126	0.612445082906415	9	25	UNKNOWN	207.142857142857
1.1.1.86	pyruvate	Streptomyces viridifaciens	5.7	26	36	10	-0.201845431200983	0.0126611815820126	0.612445082906415	9	25	UNKNOWN	207.142857142857
1.1.1.87	(2r,3s)-3-(2-hydroxyethyl)malate	Deinococcus radiodurans	25	28	30	2	0.752922702990782	NA	1	2	28	UNKNOWN	0.0312
1.1.1.87	(2r,3s)-3-(2-hydroxyethyl)malate	Saccharomyces cerevisiae	0.78	28	30	2	0.752922702990782	NA	1	2	36	UNKNOWN	0.0312
1.1.1.87	(2r,3s)-3-(3-hydroxypropyl)malate	Deinococcus radiodurans	29	28	30	2	0.390578380261686	NA	1	2	28	UNKNOWN	0.16551724137931
1.1.1.87	(2r,3s)-3-(3-hydroxypropyl)malate	Saccharomyces cerevisiae	4.8	28	30	2	0.390578380261686	NA	1	2	36	UNKNOWN	0.16551724137931
1.1.1.87	(2r,3s)-3-(4-hydroxybutyl)malate	Deinococcus radiodurans	2	28	30	2	-0.0105946495349691	NA	1	2	28	UNKNOWN	1.05
1.1.1.87	(2r,3s)-3-(4-hydroxybutyl)malate	Saccharomyces cerevisiae	2.1	28	30	2	-0.0105946495349691	NA	1	2	36	UNKNOWN	1.05
1.1.1.87	(2r,3s)-3-(4-pentenyl)malic acid	Deinococcus radiodurans	3	28	30	2	0.665496609520715	NA	1	2	28	UNKNOWN	0.0466666666666667
1.1.1.87	(2r,3s)-3-(4-pentenyl)malic acid	Saccharomyces cerevisiae	0.14	28	30	2	0.665496609520715	NA	1	2	36	UNKNOWN	0.0466666666666667
1.1.1.87	(2r,3s)-3-allylmalic acid	Deinococcus radiodurans	37	28	30	2	1.01836140351237	NA	1	2	28	UNKNOWN	0.00918918918918919
1.1.1.87	(2r,3s)-3-allylmalic acid	Saccharomyces cerevisiae	0.34	28	30	2	1.01836140351237	NA	1	2	36	UNKNOWN	0.00918918918918919
1.1.1.87	(2r,3s)-3-propylmalic acid	Deinococcus radiodurans	53	28	30	2	0.93958891479327	NA	1	2	28	UNKNOWN	0.0132075471698113
1.1.1.87	(2r,3s)-3-propylmalic acid	Saccharomyces cerevisiae	0.7	28	30	2	0.93958891479327	NA	1	2	36	UNKNOWN	0.0132075471698113
1.1.1.87	3-vinylmalate	Deinococcus radiodurans	0.77	28	30	2	0.093760360418232	NA	1	2	28	UNKNOWN	0.649350649350649
1.1.1.87	3-vinylmalate	Saccharomyces cerevisiae	0.5	28	30	2	0.093760360418232	NA	1	2	36	UNKNOWN	0.649350649350649
1.1.1.87	ethylmalate	Deinococcus radiodurans	43	28	30	2	0.924069310284414	NA	1	2	28	UNKNOWN	0.0141860465116279
1.1.1.87	ethylmalate	Saccharomyces cerevisiae	0.61	28	30	2	0.924069310284414	NA	1	2	36	UNKNOWN	0.0141860465116279
1.1.1.87	homoisocitrate	Deinococcus radiodurans	46.1	28	95	67	-0.00455001365106711	0.576747496507443	0.380609972840514	3	28	UNKNOWN	1.24087591240876
1.1.1.87	homoisocitrate	Pyrococcus horikoshii	13.7	28	95	67	-0.00455001365106711	0.576747496507443	0.380609972840514	3	70	UNKNOWN	1.24087591240876
1.1.1.87	homoisocitrate	Saccharomyces cerevisiae	17	28	95	67	-0.00455001365106711	0.576747496507443	0.380609972840514	3	NA	UNKNOWN	1.24087591240876
1.1.1.87	isocitrate	Deinococcus radiodurans	42.9	30	95	65	-0.00369980259531933	0.896646391921388	0.0261259540116258	3	25	0	2.89864864864865
1.1.1.87	isocitrate	Pyrococcus horikoshii	14.8	30	95	65	-0.00369980259531933	0.896646391921388	0.0261259540116258	3	70	UNKNOWN	2.89864864864865
1.1.1.87	isocitrate	Thermus thermophilus	438	30	95	65	-0.00369980259531933	0.896646391921388	0.0261259540116258	3	60	0	2.89864864864865
1.1.1.9	nad+	Gluconobacter oxydans	27.2	26	36	10	-0.0543805988311829	0.248922537287731	0.854748122998986	3	NA	0	2.75590551181102
1.1.1.9	nad+	Rhizomucor pusillus	6.35	26	36	10	-0.0543805988311829	0.248922537287731	0.854748122998986	3	30	UNKNOWN	2.75590551181102
1.1.1.9	nad+	Scheffersomyces stipitis	17.5	26	36	10	-0.0543805988311829	0.248922537287731	0.854748122998986	3	NA	0	2.75590551181102
1.1.1.9	nadp+	Rhizomucor pusillus	0.185	26	36	10	-0.0995279361327416	NA	1	2	30	UNKNOWN	9.89189189189189
1.1.1.9	nadp+	Scheffersomyces stipitis	1.83	26	36	10	-0.0995279361327416	NA	1	2	NA	0	9.89189189189189
1.1.1.9	xylitol	Blastobotrys adeninivorans	2379.5	24	36	12	-0.0905201577325933	0.546369858133141	0.205780305610147	4	35	UNKNOWN	107.615315315315
1.1.1.9	xylitol	Gluconobacter oxydans	24.6	24	36	12	-0.0905201577325933	0.546369858133141	0.205780305610147	4	NA	0	107.615315315315
1.1.1.9	xylitol	Meyerozyma caribbica	9.56	24	36	12	-0.0905201577325933	0.546369858133141	0.205780305610147	4	30	UNKNOWN	107.615315315315
1.1.1.9	xylitol	Rhizomucor pusillus	11.1	24	36	12	-0.0905201577325933	0.546369858133141	0.205780305610147	4	35	0	107.615315315315
1.1.1.90	benzaldehyde	Acinetobacter baylyi	12940	28	31	3	0.439381297213955	NA	1	2	30	UNKNOWN	0.0480680061823802
1.1.1.90	benzaldehyde	Pseudomonas putida	622	28	31	3	0.439381297213955	NA	1	2	NA	UNKNOWN	0.0480680061823802
1.1.1.90	benzyl alcohol	Acinetobacter calcoaceticus	97	28	33	5	-0.0206266754346308	NA	1	2	NA	UNKNOWN	1.2680412371134
1.1.1.90	benzyl alcohol	Pseudomonas putida	123	28	33	5	-0.0206266754346308	NA	1	2	NA	UNKNOWN	1.2680412371134
1.1.1.95	3-phospho-d-glycerate	Bacillus subtilis	515.5	28	37	9	-0.0777748477634236	0.47462477773034	0.106673753638852	7	NA	UNKNOWN	0.195431472081218
1.1.1.95	3-phospho-d-glycerate	Corynebacterium glutamicum	274	28	37	9	-0.0777748477634236	0.47462477773034	0.106673753638852	7	NA	UNKNOWN	0.195431472081218
1.1.1.95	3-phospho-d-glycerate	Entamoeba histolytica	16.28	28	37	9	-0.0777748477634236	0.47462477773034	0.106673753638852	7	25	0	0.195431472081218
1.1.1.95	3-phospho-d-glycerate	Escherichia coli	13.5	28	37	9	-0.0777748477634236	0.47462477773034	0.106673753638852	7	NA	0	0.195431472081218
1.1.1.95	3-phospho-d-glycerate	Mycobacterium marinum	474.5	28	37	9	-0.0777748477634236	0.47462477773034	0.106673753638852	7	NA	UNKNOWN	0.195431472081218
1.1.1.95	3-phospho-d-glycerate	Mycobacterium tuberculosis	1970	28	37	9	-0.0777748477634236	0.47462477773034	0.106673753638852	7	NA	UNKNOWN	0.195431472081218
1.1.1.95	3-phospho-d-glycerate	Streptomyces coelicolor	385	28	37	9	-0.0777748477634236	0.47462477773034	0.106673753638852	7	NA	UNKNOWN	0.195431472081218
1.1.1.95	3-phosphohydroxypyruvate	Escherichia coli	0.463	36	37	1	3.72553062268482	NA	1	2	NA	UNKNOWN	0.000188134904510362
1.1.1.95	3-phosphohydroxypyruvate	Mycobacterium tuberculosis	2461	36	37	1	3.72553062268482	NA	1	2	NA	UNKNOWN	0.000188134904510362
1.1.3.10	1,4-benzoquinone	Aspergillus nidulans	186	25	31	6	0.0752568044412571	0.694559440141819	0.0587016287574495	5	30	UNKNOWN	0.656720430107527
1.1.3.10	1,4-benzoquinone	Aspergillus oryzae	3.04	25	31	6	0.0752568044412571	0.694559440141819	0.0587016287574495	5	30	UNKNOWN	0.656720430107527
1.1.3.10	1,4-benzoquinone	Lyophyllum shimeji	92.3	25	31	6	0.0752568044412571	0.694559440141819	0.0587016287574495	5	30	UNKNOWN	0.656720430107527
1.1.3.10	1,4-benzoquinone	Phanerochaete chrysosporium	438.5	25	31	6	0.0752568044412571	0.694559440141819	0.0587016287574495	5	30	UNKNOWN	0.656720430107527
1.1.3.10	1,4-benzoquinone	Trametes ochracea	152	25	31	6	0.0752568044412571	0.694559440141819	0.0587016287574495	5	30	0	0.656720430107527
1.1.3.10	2-chloro-1,4-benzoquinone	Aspergillus nidulans	16.3	25	31	6	0.33934939089138	NA	1	2	30	UNKNOWN	0.00920245398773006
1.1.3.10	2-chloro-1,4-benzoquinone	Phanerochaete chrysosporium	0.15	25	31	6	0.33934939089138	NA	1	2	30	UNKNOWN	0.00920245398773006
1.1.3.10	2-methoxy-1,4-benzoquinone	Aspergillus nidulans	47.2	25	31	6	0.0117996043356509	NA	1	2	30	UNKNOWN	0.849576271186441
1.1.3.10	2-methoxy-1,4-benzoquinone	Phanerochaete chrysosporium	40.1	25	31	6	0.0117996043356509	NA	1	2	30	UNKNOWN	0.849576271186441
1.1.3.10	2-methyl-1,4-benzoquinone	Aspergillus nidulans	10.1	25	31	6	0.320856687955837	NA	1	2	30	UNKNOWN	0.0118811881188119
1.1.3.10	2-methyl-1,4-benzoquinone	Phanerochaete chrysosporium	0.12	25	31	6	0.320856687955837	NA	1	2	30	UNKNOWN	0.0118811881188119
1.1.3.10	2,6-dichloroindophenol	Aspergillus nidulans	13.1	25	31	6	-0.13557468569995	0.137061660822264	0.954359420913458	3	30	UNKNOWN	6.69083969465649
1.1.3.10	2,6-dichloroindophenol	Lyophyllum shimeji	67.3	25	31	6	-0.13557468569995	0.137061660822264	0.954359420913458	3	30	UNKNOWN	6.69083969465649
1.1.3.10	2,6-dichloroindophenol	Phanerochaete chrysosporium	108	25	31	6	-0.13557468569995	0.137061660822264	0.954359420913458	3	30	UNKNOWN	6.69083969465649
1.1.3.10	2,6-dimethyl-1,4-benzoquinone	Aspergillus nidulans	0.4	25	31	6	-0.222826630853451	NA	1	2	30	UNKNOWN	21.725
1.1.3.10	2,6-dimethyl-1,4-benzoquinone	Phanerochaete chrysosporium	8.69	25	31	6	-0.222826630853451	NA	1	2	30	UNKNOWN	21.725
1.1.3.10	d-fructose	Aspergillus nidulans	5.55	25	31	6	0.0493511745012815	0.505666194429498	0.491100032644421	3	30	UNKNOWN	0.546846846846847
1.1.3.10	d-fructose	Irpex lacteus	4.19	25	31	6	0.0493511745012815	0.505666194429498	0.491100032644421	3	25	UNKNOWN	0.546846846846847
1.1.3.10	d-fructose	Phanerochaete chrysosporium	1.88	25	31	6	0.0493511745012815	0.505666194429498	0.491100032644421	3	30	UNKNOWN	0.546846846846847
1.1.3.10	d-galactose	Aspergillus nidulans	1.95	23	31	8	-0.0562464676030993	0.763096408531684	0.0198650641277072	7	30	UNKNOWN	11.5384615384615
1.1.3.10	d-galactose	Aspergillus oryzae	0.02	23	31	8	-0.0562464676030993	0.763096408531684	0.0198650641277072	7	30	UNKNOWN	11.5384615384615
1.1.3.10	d-galactose	Irpex lacteus	13.1	23	31	8	-0.0562464676030993	0.763096408531684	0.0198650641277072	7	25	UNKNOWN	11.5384615384615
1.1.3.10	d-galactose	Lyophyllum shimeji	1.02	23	31	8	-0.0562464676030993	0.763096408531684	0.0198650641277072	7	30	UNKNOWN	11.5384615384615
1.1.3.10	d-galactose	Phanerochaete chrysosporium	4.87	23	31	8	-0.0562464676030993	0.763096408531684	0.0198650641277072	7	30	UNKNOWN	11.5384615384615
1.1.3.10	d-galactose	Trametes ochracea	1.855	23	31	8	-0.0562464676030993	0.763096408531684	0.0198650641277072	7	25	0	11.5384615384615
1.1.3.10	d-galactose	Tricholoma matsutake	22.5	23	31	8	-0.0562464676030993	0.763096408531684	0.0198650641277072	7	37	UNKNOWN	11.5384615384615
1.1.3.10	d-glucose	Aspergillus nidulans	35.44	23	31	8	-0.00525191858454791	0.965613148703892	0.000410454835349671	7	30	UNKNOWN	3.13205417607224
1.1.3.10	d-glucose	Aspergillus oryzae	1.48	23	31	8	-0.00525191858454791	0.965613148703892	0.000410454835349671	7	30	UNKNOWN	3.13205417607224
1.1.3.10	d-glucose	Irpex lacteus	33.8	23	31	8	-0.00525191858454791	0.965613148703892	0.000410454835349671	7	25	UNKNOWN	3.13205417607224
1.1.3.10	d-glucose	Lyophyllum shimeji	6.92	23	31	8	-0.00525191858454791	0.965613148703892	0.000410454835349671	7	30	UNKNOWN	3.13205417607224
1.1.3.10	d-glucose	Phanerochaete chrysosporium	83.1	23	31	8	-0.00525191858454791	0.965613148703892	0.000410454835349671	7	30	UNKNOWN	3.13205417607224
1.1.3.10	d-glucose	Trametes ochracea	25.35	23	31	8	-0.00525191858454791	0.965613148703892	0.000410454835349671	7	NA	UNKNOWN	3.13205417607224
1.1.3.10	d-glucose	Tricholoma matsutake	111	23	31	8	-0.00525191858454791	0.965613148703892	0.000410454835349671	7	37	UNKNOWN	3.13205417607224
1.1.3.10	d-mannose	Irpex lacteus	6.2	23	25	2	-0.303641015991391	NA	1	2	25	UNKNOWN	4.04838709677419
1.1.3.10	d-mannose	Tricholoma matsutake	25.1	23	25	2	-0.303641015991391	NA	1	2	37	UNKNOWN	4.04838709677419
1.1.3.10	d-xylose	Aspergillus nidulans	1.39	23	31	8	-0.161957906678289	0.337229169613021	0.228796846676324	6	30	UNKNOWN	40.1438848920863
1.1.3.10	d-xylose	Aspergillus oryzae	0.27	23	31	8	-0.161957906678289	0.337229169613021	0.228796846676324	6	30	UNKNOWN	40.1438848920863
1.1.3.10	d-xylose	Irpex lacteus	25.4	23	31	8	-0.161957906678289	0.337229169613021	0.228796846676324	6	25	UNKNOWN	40.1438848920863
1.1.3.10	d-xylose	Lyophyllum shimeji	5.48	23	31	8	-0.161957906678289	0.337229169613021	0.228796846676324	6	30	UNKNOWN	40.1438848920863
1.1.3.10	d-xylose	Phanerochaete chrysosporium	44.9	23	31	8	-0.161957906678289	0.337229169613021	0.228796846676324	6	30	UNKNOWN	40.1438848920863
1.1.3.10	d-xylose	Tricholoma matsutake	55.8	23	31	8	-0.161957906678289	0.337229169613021	0.228796846676324	6	37	UNKNOWN	40.1438848920863
1.1.3.10	ferricenium hexafluorophosphate	Aspergillus nidulans	158	25	31	6	0.131456185782803	0.765434551221367	0.129725404674711	3	30	UNKNOWN	1.23481012658228
1.1.3.10	ferricenium hexafluorophosphate	Aspergillus oryzae	1.7	25	31	6	0.131456185782803	0.765434551221367	0.129725404674711	3	30	UNKNOWN	1.23481012658228
1.1.3.10	ferricenium hexafluorophosphate	Phanerochaete chrysosporium	388.5	25	31	6	0.131456185782803	0.765434551221367	0.129725404674711	3	30	UNKNOWN	1.23481012658228
1.1.3.10	l-sorbose	Aspergillus nidulans	9.66	23	31	8	-0.0729536395581553	0.552103278964912	0.0950936425695903	6	30	UNKNOWN	7.72256728778468
1.1.3.10	l-sorbose	Aspergillus oryzae	1.59	23	31	8	-0.0729536395581553	0.552103278964912	0.0950936425695903	6	30	UNKNOWN	7.72256728778468
1.1.3.10	l-sorbose	Irpex lacteus	41.4	23	31	8	-0.0729536395581553	0.552103278964912	0.0950936425695903	6	25	UNKNOWN	7.72256728778468
1.1.3.10	l-sorbose	Lyophyllum shimeji	7.7	23	31	8	-0.0729536395581553	0.552103278964912	0.0950936425695903	6	30	UNKNOWN	7.72256728778468
1.1.3.10	l-sorbose	Phanerochaete chrysosporium	58.8	23	31	8	-0.0729536395581553	0.552103278964912	0.0950936425695903	6	30	UNKNOWN	7.72256728778468
1.1.3.10	l-sorbose	Tricholoma matsutake	74.6	23	31	8	-0.0729536395581553	0.552103278964912	0.0950936425695903	6	37	UNKNOWN	7.72256728778468
1.1.3.10	tetrafluoro-1,4-benzoquinone	Aspergillus nidulans	129	25	31	6	0.215064708468935	NA	1	2	30	UNKNOWN	0.0512403100775194
1.1.3.10	tetrafluoro-1,4-benzoquinone	Phanerochaete chrysosporium	6.61	25	31	6	0.215064708468935	NA	1	2	30	UNKNOWN	0.0512403100775194
1.1.3.13	methanol	Gloeophyllum trabeum	15.6	21	25	4	0.162313588114939	0.541386167656402	0.435173766535667	3	NA	UNKNOWN	0.366666666666667
1.1.3.13	methanol	Komagataella pastoris	5.72	21	25	4	0.162313588114939	0.541386167656402	0.435173766535667	3	30	UNKNOWN	0.366666666666667
1.1.3.13	methanol	Ogataea angusta	60	21	25	4	0.162313588114939	0.541386167656402	0.435173766535667	3	30	UNKNOWN	0.366666666666667
1.1.3.37	d-arabinono-1,4-lactone	Candida albicans	20.9	25	26	1	0.286722530624106	NA	1	2	NA	UNKNOWN	0.516746411483254
1.1.3.37	d-arabinono-1,4-lactone	Leishmania donovani	10.8	25	26	1	0.286722530624106	NA	1	2	22	UNKNOWN	0.516746411483254
1.1.3.4	beta-d-glucose	Aspergillus niger	56.4	24	26	2	-0.752959661078001	NA	1	2	50	UNKNOWN	32.0567375886525
1.1.3.4	beta-d-glucose	Penicillium amagasakiense	1808	24	26	2	-0.752959661078001	NA	1	2	37	0	32.0567375886525
1.1.3.41	(r)-1-phenyl-1,2-ethanediol	Acidothermus cellulolyticus	0.1	28	55	27	-0.0321937673974436	NA	1	2	25	UNKNOWN	7.4
1.1.3.41	(r)-1-phenyl-1,2-ethanediol	Streptomyces coelicolor	0.74	28	55	27	-0.0321937673974436	NA	1	2	30	UNKNOWN	7.4
1.1.3.41	(s)-1-phenyl-1,2-ethanediol	Acidothermus cellulolyticus	4e-04	28	55	27	-0.048186296135703	NA	1	2	25	UNKNOWN	20
1.1.3.41	(s)-1-phenyl-1,2-ethanediol	Streptomyces coelicolor	0.008	28	55	27	-0.048186296135703	NA	1	2	30	UNKNOWN	20
1.1.3.41	1-phenyl-1,2-ethanediol	Acidothermus cellulolyticus	0.1	28	55	27	-0.0206037963247144	NA	1	2	25	UNKNOWN	3.6
1.1.3.41	1-phenyl-1,2-ethanediol	Streptomyces coelicolor	0.36	28	55	27	-0.0206037963247144	NA	1	2	30	UNKNOWN	3.6
1.1.3.41	d-mannitol	Acidothermus cellulolyticus	2.5	28	55	27	-0.0209573266175377	NA	1	2	25	UNKNOWN	3.68
1.1.3.41	d-mannitol	Streptomyces coelicolor	9.2	28	55	27	-0.0209573266175377	NA	1	2	30	UNKNOWN	3.68
1.1.3.41	d-sorbitol	Acidothermus cellulolyticus	1.2	28	55	27	-0.0426395435307648	NA	1	2	25	UNKNOWN	14.1666666666667
1.1.3.41	d-sorbitol	Streptomyces coelicolor	17	28	55	27	-0.0426395435307648	NA	1	2	30	UNKNOWN	14.1666666666667
1.1.3.41	glycerol	Acidothermus cellulolyticus	1.3	28	55	27	-0.00333987519811437	NA	1	2	25	UNKNOWN	1.23076923076923
1.1.3.41	glycerol	Streptomyces coelicolor	1.6	28	55	27	-0.00333987519811437	NA	1	2	30	UNKNOWN	1.23076923076923
1.1.3.41	xylitol	Acidothermus cellulolyticus	1.9	28	55	27	-0.0309329537538522	NA	1	2	25	UNKNOWN	6.84210526315789
1.1.3.41	xylitol	Streptomyces coelicolor	13	28	55	27	-0.0309329537538522	NA	1	2	30	UNKNOWN	6.84210526315789
1.1.3.6	3beta-hydroxy-androst-5-en-17-one	Brevibacterium sterolicum	0.8	27	30	3	-0.325907868429616	NA	1	2	NA	UNKNOWN	9.5
1.1.3.6	3beta-hydroxy-androst-5-en-17-one	Streptomyces hygroscopicus	7.6	27	30	3	-0.325907868429616	NA	1	2	NA	UNKNOWN	9.5
1.1.3.6	5-cholesten-3-one	Brevibacterium sterolicum	264	27	30	3	-0.0331780522780686	NA	1	2	NA	UNKNOWN	1.25757575757576
1.1.3.6	5-cholesten-3-one	Streptomyces hygroscopicus	332	27	30	3	-0.0331780522780686	NA	1	2	NA	UNKNOWN	1.25757575757576
1.1.3.6	cholestanol	Brevibacterium sterolicum	40	27	30	3	0.011286089086989	NA	1	2	NA	UNKNOWN	0.925
1.1.3.6	cholestanol	Streptomyces hygroscopicus	37	27	30	3	0.011286089086989	NA	1	2	NA	UNKNOWN	0.925
1.1.3.6	cholesterol	Brevibacterium sterolicum	52.05	27	30	3	0.142128707494679	NA	1	2	NA	UNKNOWN	0.37463976945245
1.1.3.6	cholesterol	Streptomyces hygroscopicus	19.5	27	30	3	0.142128707494679	NA	1	2	25	UNKNOWN	0.37463976945245
1.1.3.6	pregnenolone	Brevibacterium sterolicum	28	27	30	3	0.0316585044102855	NA	1	2	NA	UNKNOWN	0.803571428571429
1.1.3.6	pregnenolone	Streptomyces hygroscopicus	22.5	27	30	3	0.0316585044102855	NA	1	2	25	UNKNOWN	0.803571428571429
1.1.3.6	trans-androsterone	Brevibacterium sterolicum	0.8	27	30	3	-0.314002684340771	NA	1	2	25	UNKNOWN	8.75
1.1.3.6	trans-androsterone	Streptomyces hygroscopicus	7	27	30	3	-0.314002684340771	NA	1	2	25	UNKNOWN	8.75
1.1.3.6	trans-dehydroandrosterone	Brevibacterium sterolicum	0.9	27	30	3	-0.299005279759917	NA	1	2	25	UNKNOWN	7.88888888888889
1.1.3.6	trans-dehydroandrosterone	Streptomyces hygroscopicus	7.1	27	30	3	-0.299005279759917	NA	1	2	25	UNKNOWN	7.88888888888889
1.1.3.7	2,4-hexadien-1-ol	Pleurotus eryngii	136	24	26	2	-0.163679467193164	NA	1	2	24	UNKNOWN	2.125
1.1.3.7	2,4-hexadien-1-ol	Ustilago maydis	64	24	26	2	-0.163679467193164	NA	1	2	30	UNKNOWN	2.125
1.1.3.7	3,4-dimethoxybenzyl alcohol	Aspergillus terreus	105.7	24	26	2	0.273476866293882	NA	1	2	30	UNKNOWN	0.283822138126774
1.1.3.7	3,4-dimethoxybenzyl alcohol	Pleurotus pulmonarius	30	24	26	2	0.273476866293882	NA	1	2	NA	UNKNOWN	0.283822138126774
1.1.3.7	4-methoxybenzyl alcohol	Aspergillus terreus	140.9	24	26	2	-0.0309711861027684	NA	1	2	30	UNKNOWN	1.15330021291696
1.1.3.7	4-methoxybenzyl alcohol	Pleurotus eryngii	162.5	24	26	2	-0.0309711861027684	NA	1	2	25	UNKNOWN	1.15330021291696
1.1.3.7	benzyl alcohol	Aspergillus terreus	2.2	24	26	2	-0.226935104625657	0.744943498564782	0.15210734250767	3	30	UNKNOWN	1.29353233830846
1.1.3.7	benzyl alcohol	Pleurotus eryngii	26	24	26	2	-0.226935104625657	0.744943498564782	0.15210734250767	3	24	0	1.29353233830846
1.1.3.7	benzyl alcohol	Pleurotus sapidus	38	24	26	2	-0.226935104625657	0.744943498564782	0.15210734250767	3	30	UNKNOWN	1.29353233830846
1.1.3.7	cinnamyl alcohol	Pleurotus eryngii	65	24	26	2	0.0657846577536565	NA	1	2	24	UNKNOWN	0.738636363636364
1.1.3.7	cinnamyl alcohol	Ustilago maydis	88	24	26	2	0.0657846577536565	NA	1	2	30	UNKNOWN	0.738636363636364
1.1.3.7	veratryl alcohol	Pleurotus eryngii	90	24	26	2	-0.0847777773159017	0.351992301452985	0.724202417069149	3	24	0	1.46341463414634
1.1.3.7	veratryl alcohol	Pleurotus sapidus	70	24	26	2	-0.0847777773159017	0.351992301452985	0.724202417069149	3	30	UNKNOWN	1.46341463414634
1.1.3.7	veratryl alcohol	Ustilago maydis	53	24	26	2	-0.0847777773159017	0.351992301452985	0.724202417069149	3	30	UNKNOWN	1.46341463414634
1.1.3.9	d-galactose	Fusarium graminearum	503	24	25	1	0.0581153085697401	NA	1	2	30	0	0.874751491053678
1.1.3.9	d-galactose	Hypomyces rosellus	440	24	25	1	0.0581153085697401	NA	1	2	NA	0	0.874751491053678
1.1.5.2	2-deoxy-d-glucose	Acinetobacter calcoaceticus	331	29	71	42	0.0170904725341558	0.153986699636244	0.942625373291763	3	NA	0	0.158282208588957
1.1.5.2	2-deoxy-d-glucose	Gluconacetobacter diazotrophicus	180.6	29	71	42	0.0170904725341558	0.153986699636244	0.942625373291763	3	25	UNKNOWN	0.158282208588957
1.1.5.2	2-deoxy-d-glucose	Thermus thermophilus	1141	29	71	42	0.0170904725341558	0.153986699636244	0.942625373291763	3	70	0	0.158282208588957
1.1.5.2	3-o-methyl-d-glucose	Acinetobacter calcoaceticus	2230.5	33	36	3	0.0434361759783744	NA	1	2	NA	0	0.74078379275988
1.1.5.2	3-o-methyl-d-glucose	Escherichia coli	3011	33	36	3	0.0434361759783744	NA	1	2	25	0	0.74078379275988
1.1.5.2	allose	Acinetobacter calcoaceticus	2509	33	36	3	2.09345661157836e-16	NA	NA	2	NA	0	1
1.1.5.2	allose	Escherichia coli	2509	33	36	3	2.09345661157836e-16	NA	NA	2	25	0	1
1.1.5.2	d-galactose	Acinetobacter calcoaceticus	176.5	29	98	69	-0.0169497796118012	0.288092958969021	0.35608658376345	5	NA	0	37.3255813953488
1.1.5.2	d-galactose	Escherichia coli	232	29	98	69	-0.0169497796118012	0.288092958969021	0.35608658376345	5	25	0	37.3255813953488
1.1.5.2	d-galactose	Gluconacetobacter diazotrophicus	160.5	29	98	69	-0.0169497796118012	0.288092958969021	0.35608658376345	5	25	UNKNOWN	37.3255813953488
1.1.5.2	d-galactose	Pyrobaculum aerophilum	4.3	29	98	69	-0.0169497796118012	0.288092958969021	0.35608658376345	5	50	UNKNOWN	37.3255813953488
1.1.5.2	d-galactose	Thermus thermophilus	823	29	98	69	-0.0169497796118012	0.288092958969021	0.35608658376345	5	70	0	37.3255813953488
1.1.5.2	d-glucose	Acinetobacter calcoaceticus	3440	28	98	70	-0.0295530836653436	0.0835641496514752	0.567972157037629	6	NA	0	433.90243902439
1.1.5.2	d-glucose	Escherichia coli	3610	28	98	70	-0.0295530836653436	0.0835641496514752	0.567972157037629	6	NA	UNKNOWN	433.90243902439
1.1.5.2	d-glucose	Gluconacetobacter diazotrophicus	186.3	28	98	70	-0.0295530836653436	0.0835641496514752	0.567972157037629	6	25	UNKNOWN	433.90243902439
1.1.5.2	d-glucose	Pyrobaculum aerophilum	4.1	28	98	70	-0.0295530836653436	0.0835641496514752	0.567972157037629	6	50	UNKNOWN	433.90243902439
1.1.5.2	d-glucose	Sorangium cellulosum	1779	28	98	70	-0.0295530836653436	0.0835641496514752	0.567972157037629	6	37	0	433.90243902439
1.1.5.2	d-glucose	Thermus thermophilus	1054	28	98	70	-0.0295530836653436	0.0835641496514752	0.567972157037629	6	70	0	433.90243902439
1.1.5.2	d-mannose	Acinetobacter calcoaceticus	267	33	98	65	-0.0264770429830405	0.576219164338331	0.381416033137645	3	NA	0	86.1290322580645
1.1.5.2	d-mannose	Pyrobaculum aerophilum	3.1	33	98	65	-0.0264770429830405	0.576219164338331	0.381416033137645	3	50	UNKNOWN	86.1290322580645
1.1.5.2	d-mannose	Thermus thermophilus	1627	33	98	65	-0.0264770429830405	0.576219164338331	0.381416033137645	3	70	0	86.1290322580645
1.1.5.2	d-xylose	Acinetobacter calcoaceticus	201	33	98	65	-0.0242691702189817	0.611694196878524	0.328129542824074	3	NA	0	62.8125
1.1.5.2	d-xylose	Pyrobaculum aerophilum	3.2	33	98	65	-0.0242691702189817	0.611694196878524	0.328129542824074	3	50	UNKNOWN	62.8125
1.1.5.2	d-xylose	Thermus thermophilus	1681	33	98	65	-0.0242691702189817	0.611694196878524	0.328129542824074	3	70	0	62.8125
1.1.5.2	lactose	Acinetobacter calcoaceticus	1164	33	36	3	0.051297801903497	NA	1	2	NA	0	0.701627486437613
1.1.5.2	lactose	Escherichia coli	1659	33	36	3	0.051297801903497	NA	1	2	25	0	0.701627486437613
1.1.5.2	maltose	Acinetobacter calcoaceticus	1357.5	33	98	65	-0.0397062958890812	0.131996342877493	0.753430348778047	4	NA	0	590.217391304348
1.1.5.2	maltose	Escherichia coli	2400	33	98	65	-0.0397062958890812	0.131996342877493	0.753430348778047	4	25	0	590.217391304348
1.1.5.2	maltose	Pyrobaculum aerophilum	2.3	33	98	65	-0.0397062958890812	0.131996342877493	0.753430348778047	4	50	UNKNOWN	590.217391304348
1.1.5.2	maltose	Thermus thermophilus	1022	33	98	65	-0.0397062958890812	0.131996342877493	0.753430348778047	4	70	0	590.217391304348
1.1.5.2	maltotriose	Escherichia coli	2270	36	71	35	-0.0133831016244967	NA	1	2	NA	UNKNOWN	2.94041450777202
1.1.5.2	maltotriose	Thermus thermophilus	772	36	71	35	-0.0133831016244967	NA	1	2	70	0	2.94041450777202
1.1.5.9	d-glucose	Acinetobacter baumannii	5330	24	33	9	0.0506006148683333	0.624307834518918	0.0897679042717588	5	NA	UNKNOWN	0.0965947467166979
1.1.5.9	d-glucose	Aspergillus flavus	780	24	33	9	0.0506006148683333	0.624307834518918	0.0897679042717588	5	25	0	0.0965947467166979
1.1.5.9	d-glucose	Burkholderia cepacia	69.54	24	33	9	0.0506006148683333	0.624307834518918	0.0897679042717588	5	NA	UNKNOWN	0.0965947467166979
1.1.5.9	d-glucose	Colletotrichum gloeosporioides	280	24	33	9	0.0506006148683333	0.624307834518918	0.0897679042717588	5	30	UNKNOWN	0.0965947467166979
1.1.5.9	d-glucose	Mucor circinelloides	749.7	24	33	9	0.0506006148683333	0.624307834518918	0.0897679042717588	5	37	UNKNOWN	0.0965947467166979
1.1.98.2	d-glucose 6-phosphate	Mycobacterium tuberculosis	1.4	29	37	8	-0.135540110712505	NA	1	2	22	0	12.1428571428571
1.1.98.2	d-glucose 6-phosphate	Rhodococcus jostii	17	29	37	8	-0.135540110712505	NA	1	2	25	0	12.1428571428571
1.1.99.18	1,4-benzoquinone	Trametes pubescens	27.5	25	29	4	-0.0303173397168751	NA	1	2	30	UNKNOWN	1.32211538461538
1.1.99.18	1,4-benzoquinone	Trametes villosa	20.8	25	29	4	-0.0303173397168751	NA	1	2	30	UNKNOWN	1.32211538461538
1.1.99.18	2,6-dichlorophenol indophenol	Neurospora crassa	24.8	24	29	5	0.12311945296014	0.266207297184386	0.382383782289997	5	30	UNKNOWN	0.10498687664042
1.1.99.18	2,6-dichlorophenol indophenol	Phanerochaete chrysosporium	27	24	29	5	0.12311945296014	0.266207297184386	0.382383782289997	5	NA	0	0.10498687664042
1.1.99.18	2,6-dichlorophenol indophenol	Stachybotrys bisbyi	4	24	29	5	0.12311945296014	0.266207297184386	0.382383782289997	5	30	UNKNOWN	0.10498687664042
1.1.99.18	2,6-dichlorophenol indophenol	Trametes pubescens	25.6	24	29	5	0.12311945296014	0.266207297184386	0.382383782289997	5	30	UNKNOWN	0.10498687664042
1.1.99.18	2,6-dichlorophenol indophenol	Trametes villosa	38.1	24	29	5	0.12311945296014	0.266207297184386	0.382383782289997	5	30	UNKNOWN	0.10498687664042
1.1.99.18	2,6-dichlorphenolindophenol	Humicola insolens	17	26	41	15	-0.0379261085383539	NA	1	2	NA	UNKNOWN	3.70588235294118
1.1.99.18	2,6-dichlorphenolindophenol	Schizophyllum commune	63	26	41	15	-0.0379261085383539	NA	1	2	NA	UNKNOWN	3.70588235294118
1.1.99.18	3,5-di-tert-butyl-1,2-benzoquinone	Phanerochaete chrysosporium	27	25	29	4	-0.0449257151140091	0.143402912779045	0.950111806303827	3	NA	UNKNOWN	1.51479289940828
1.1.99.18	3,5-di-tert-butyl-1,2-benzoquinone	Trametes pubescens	24.2	25	29	4	-0.0449257151140091	0.143402912779045	0.950111806303827	3	30	UNKNOWN	1.51479289940828
1.1.99.18	3,5-di-tert-butyl-1,2-benzoquinone	Trametes villosa	16.9	25	29	4	-0.0449257151140091	0.143402912779045	0.950111806303827	3	30	UNKNOWN	1.51479289940828
1.1.99.18	cellobiose	Athelia rolfsii	23.5	24	41	17	-0.00679854997137701	0.722945533183625	0.0146520076379114	11	NA	UNKNOWN	0.785714285714286
1.1.99.18	cellobiose	Cerrena unicolor	18.96	24	41	17	-0.00679854997137701	0.722945533183625	0.0146520076379114	11	30	UNKNOWN	0.785714285714286
1.1.99.18	cellobiose	Coprinopsis cinerea	96.9	24	41	17	-0.00679854997137701	0.722945533183625	0.0146520076379114	11	NA	UNKNOWN	0.785714285714286
1.1.99.18	cellobiose	Humicola insolens	14	24	41	17	-0.00679854997137701	0.722945533183625	0.0146520076379114	11	NA	UNKNOWN	0.785714285714286
1.1.99.18	cellobiose	Neurospora crassa	13.5	24	41	17	-0.00679854997137701	0.722945533183625	0.0146520076379114	11	30	UNKNOWN	0.785714285714286
1.1.99.18	cellobiose	Phanerochaete chrysosporium	15.5	24	41	17	-0.00679854997137701	0.722945533183625	0.0146520076379114	11	NA	UNKNOWN	0.785714285714286
1.1.99.18	cellobiose	Podospora anserina	8.56	24	41	17	-0.00679854997137701	0.722945533183625	0.0146520076379114	11	NA	UNKNOWN	0.785714285714286
1.1.99.18	cellobiose	Schizophyllum commune	13	24	41	17	-0.00679854997137701	0.722945533183625	0.0146520076379114	11	NA	UNKNOWN	0.785714285714286
1.1.99.18	cellobiose	Stachybotrys bisbyi	11	24	41	17	-0.00679854997137701	0.722945533183625	0.0146520076379114	11	30	UNKNOWN	0.785714285714286
1.1.99.18	cellobiose	Trametes pubescens	21.9	24	41	17	-0.00679854997137701	0.722945533183625	0.0146520076379114	11	30	UNKNOWN	0.785714285714286
1.1.99.18	cellobiose	Trametes villosa	23.6	24	41	17	-0.00679854997137701	0.722945533183625	0.0146520076379114	11	30	UNKNOWN	0.785714285714286
1.1.99.18	cellopentaose	Athelia rolfsii	24	25	41	16	-0.0118908318758164	0.326048959838674	0.191561380522818	7	NA	UNKNOWN	1.79166666666667
1.1.99.18	cellopentaose	Humicola insolens	12	25	41	16	-0.0118908318758164	0.326048959838674	0.191561380522818	7	NA	UNKNOWN	1.79166666666667
1.1.99.18	cellopentaose	Neurospora crassa	25.7	25	41	16	-0.0118908318758164	0.326048959838674	0.191561380522818	7	30	UNKNOWN	1.79166666666667
1.1.99.18	cellopentaose	Phanerochaete chrysosporium	21.5	25	41	16	-0.0118908318758164	0.326048959838674	0.191561380522818	7	NA	UNKNOWN	1.79166666666667
1.1.99.18	cellopentaose	Schizophyllum commune	10	25	41	16	-0.0118908318758164	0.326048959838674	0.191561380522818	7	NA	UNKNOWN	1.79166666666667
1.1.99.18	cellopentaose	Trametes pubescens	13.9	25	41	16	-0.0118908318758164	0.326048959838674	0.191561380522818	7	30	UNKNOWN	1.79166666666667
1.1.99.18	cellopentaose	Trametes villosa	14.7	25	41	16	-0.0118908318758164	0.326048959838674	0.191561380522818	7	30	UNKNOWN	1.79166666666667
1.1.99.18	cellotetraose	Athelia rolfsii	24	24	41	17	-0.0133719178183934	0.617469732576718	0.0375318882756892	9	NA	UNKNOWN	4.4
1.1.99.18	cellotetraose	Coprinopsis cinerea	101.6	24	41	17	-0.0133719178183934	0.617469732576718	0.0375318882756892	9	NA	UNKNOWN	4.4
1.1.99.18	cellotetraose	Humicola insolens	12	24	41	17	-0.0133719178183934	0.617469732576718	0.0375318882756892	9	NA	UNKNOWN	4.4
1.1.99.18	cellotetraose	Neurospora crassa	23.9	24	41	17	-0.0133719178183934	0.617469732576718	0.0375318882756892	9	30	UNKNOWN	4.4
1.1.99.18	cellotetraose	Phanerochaete chrysosporium	20.7	24	41	17	-0.0133719178183934	0.617469732576718	0.0375318882756892	9	NA	UNKNOWN	4.4
1.1.99.18	cellotetraose	Podospora anserina	4	24	41	17	-0.0133719178183934	0.617469732576718	0.0375318882756892	9	NA	UNKNOWN	4.4
1.1.99.18	cellotetraose	Schizophyllum commune	12	24	41	17	-0.0133719178183934	0.617469732576718	0.0375318882756892	9	NA	UNKNOWN	4.4
1.1.99.18	cellotetraose	Trametes pubescens	15	24	41	17	-0.0133719178183934	0.617469732576718	0.0375318882756892	9	30	UNKNOWN	4.4
1.1.99.18	cellotetraose	Trametes villosa	14.2	24	41	17	-0.0133719178183934	0.617469732576718	0.0375318882756892	9	30	UNKNOWN	4.4
1.1.99.18	cellotriose	Athelia rolfsii	26	24	41	17	-0.0172710235997185	0.64344968761067	0.0462065415539487	7	NA	UNKNOWN	6.65833333333333
1.1.99.18	cellotriose	Coprinopsis cinerea	156	24	41	17	-0.0172710235997185	0.64344968761067	0.0462065415539487	7	NA	UNKNOWN	6.65833333333333
1.1.99.18	cellotriose	Humicola insolens	12	24	41	17	-0.0172710235997185	0.64344968761067	0.0462065415539487	7	NA	UNKNOWN	6.65833333333333
1.1.99.18	cellotriose	Neurospora crassa	24.78	24	41	17	-0.0172710235997185	0.64344968761067	0.0462065415539487	7	30	UNKNOWN	6.65833333333333
1.1.99.18	cellotriose	Phanerochaete chrysosporium	24	24	41	17	-0.0172710235997185	0.64344968761067	0.0462065415539487	7	NA	UNKNOWN	6.65833333333333
1.1.99.18	cellotriose	Podospora anserina	3.8	24	41	17	-0.0172710235997185	0.64344968761067	0.0462065415539487	7	NA	UNKNOWN	6.65833333333333
1.1.99.18	cellotriose	Schizophyllum commune	12	24	41	17	-0.0172710235997185	0.64344968761067	0.0462065415539487	7	NA	UNKNOWN	6.65833333333333
1.1.99.18	cytochrome c	Humicola insolens	27	24	41	17	0.0152978768103943	0.484481104971987	0.102245702717788	7	NA	UNKNOWN	0.181481481481481
1.1.99.18	cytochrome c	Neurospora crassa	28.7	24	41	17	0.0152978768103943	0.484481104971987	0.102245702717788	7	30	UNKNOWN	0.181481481481481
1.1.99.18	cytochrome c	Phanerochaete chrysosporium	18.25	24	41	17	0.0152978768103943	0.484481104971987	0.102245702717788	7	NA	0	0.181481481481481
1.1.99.18	cytochrome c	Schizophyllum commune	25	24	41	17	0.0152978768103943	0.484481104971987	0.102245702717788	7	NA	UNKNOWN	0.181481481481481
1.1.99.18	cytochrome c	Stachybotrys bisbyi	4.9	24	41	17	0.0152978768103943	0.484481104971987	0.102245702717788	7	30	UNKNOWN	0.181481481481481
1.1.99.18	cytochrome c	Trametes pubescens	29.4	24	41	17	0.0152978768103943	0.484481104971987	0.102245702717788	7	30	UNKNOWN	0.181481481481481
1.1.99.18	cytochrome c	Trametes villosa	32.5	24	41	17	0.0152978768103943	0.484481104971987	0.102245702717788	7	30	UNKNOWN	0.181481481481481
1.1.99.18	d-glucose	Coprinopsis cinerea	34.4	24	25	1	-0.429267175618766	0.496617535494056	0.122404278556737	6	NA	UNKNOWN	9.84732824427481
1.1.99.18	d-glucose	Neurospora crassa	22.9	24	25	1	-0.429267175618766	0.496617535494056	0.122404278556737	6	30	UNKNOWN	9.84732824427481
1.1.99.18	d-glucose	Phanerochaete chrysosporium	1.22	24	25	1	-0.429267175618766	0.496617535494056	0.122404278556737	6	30	UNKNOWN	9.84732824427481
1.1.99.18	d-glucose	Podospora anserina	1.6	24	25	1	-0.429267175618766	0.496617535494056	0.122404278556737	6	NA	UNKNOWN	9.84732824427481
1.1.99.18	d-glucose	Stachybotrys bisbyi	12.9	24	25	1	-0.429267175618766	0.496617535494056	0.122404278556737	6	30	UNKNOWN	9.84732824427481
1.1.99.18	d-glucose	Trametes pubescens	1.31	24	25	1	-0.429267175618766	0.496617535494056	0.122404278556737	6	30	UNKNOWN	9.84732824427481
1.1.99.18	ferricenium ion	Trametes pubescens	34.7	25	29	4	0.00278013079550036	NA	1	2	30	UNKNOWN	0.974719101123595
1.1.99.18	ferricenium ion	Trametes villosa	35.6	25	29	4	0.00278013079550036	NA	1	2	30	UNKNOWN	0.974719101123595
1.1.99.18	ferricyanide	Humicola insolens	14	25	41	16	0.000734752029602753	0.372207536229194	0.695386798890578	3	NA	UNKNOWN	0.982142857142857
1.1.99.18	ferricyanide	Phanerochaete chrysosporium	13.75	25	41	16	0.000734752029602753	0.372207536229194	0.695386798890578	3	NA	UNKNOWN	0.982142857142857
1.1.99.18	ferricyanide	Schizophyllum commune	13.5	25	41	16	0.000734752029602753	0.372207536229194	0.695386798890578	3	NA	UNKNOWN	0.982142857142857
1.1.99.18	glucose	Neurospora crassa	7.6	25	29	4	-0.14937809089431	NA	1	2	30	UNKNOWN	3.95833333333333
1.1.99.18	glucose	Trametes villosa	1.92	25	29	4	-0.14937809089431	NA	1	2	30	UNKNOWN	3.95833333333333
1.1.99.18	k3fe(cn)6	Trametes pubescens	27.8	25	29	4	0.0307453925602461	NA	1	2	30	UNKNOWN	0.753387533875339
1.1.99.18	k3fe(cn)6	Trametes villosa	36.9	25	29	4	0.0307453925602461	NA	1	2	30	UNKNOWN	0.753387533875339
1.1.99.18	lactose	Athelia rolfsii	26	24	41	17	-0.000654830710476084	0.981330568572402	5.75609133958435e-05	12	NA	UNKNOWN	0.901785714285714
1.1.99.18	lactose	Cerrena unicolor	20.16	24	41	17	-0.000654830710476084	0.981330568572402	5.75609133958435e-05	12	30	UNKNOWN	0.901785714285714
1.1.99.18	lactose	Coprinopsis cinerea	136.3	24	41	17	-0.000654830710476084	0.981330568572402	5.75609133958435e-05	12	NA	UNKNOWN	0.901785714285714
1.1.99.18	lactose	Humicola insolens	14	24	41	17	-0.000654830710476084	0.981330568572402	5.75609133958435e-05	12	NA	UNKNOWN	0.901785714285714
1.1.99.18	lactose	Neurospora crassa	11.8	24	41	17	-0.000654830710476084	0.981330568572402	5.75609133958435e-05	12	30	UNKNOWN	0.901785714285714
1.1.99.18	lactose	Phanerochaete chrysosporium	13.85	24	41	17	-0.000654830710476084	0.981330568572402	5.75609133958435e-05	12	30	UNKNOWN	0.901785714285714
1.1.99.18	lactose	Phanerochaete sordida	14	24	41	17	-0.000654830710476084	0.981330568572402	5.75609133958435e-05	12	NA	UNKNOWN	0.901785714285714
1.1.99.18	lactose	Podospora anserina	2.6	24	41	17	-0.000654830710476084	0.981330568572402	5.75609133958435e-05	12	NA	UNKNOWN	0.901785714285714
1.1.99.18	lactose	Schizophyllum commune	6	24	41	17	-0.000654830710476084	0.981330568572402	5.75609133958435e-05	12	NA	UNKNOWN	0.901785714285714
1.1.99.18	lactose	Stachybotrys bisbyi	11.25	24	41	17	-0.000654830710476084	0.981330568572402	5.75609133958435e-05	12	30	UNKNOWN	0.901785714285714
1.1.99.18	lactose	Trametes pubescens	25.8	24	41	17	-0.000654830710476084	0.981330568572402	5.75609133958435e-05	12	30	UNKNOWN	0.901785714285714
1.1.99.18	lactose	Trametes villosa	26.9	24	41	17	-0.000654830710476084	0.981330568572402	5.75609133958435e-05	12	NA	UNKNOWN	0.901785714285714
1.1.99.18	maltose	Humicola insolens	1.2	24	41	17	0.0147161770596504	0.606067134644495	0.0990152875146814	5	NA	UNKNOWN	0.295833333333333
1.1.99.18	maltose	Neurospora crassa	0.6	24	41	17	0.0147161770596504	0.606067134644495	0.0990152875146814	5	30	UNKNOWN	0.295833333333333
1.1.99.18	maltose	Stachybotrys bisbyi	0.355	24	41	17	0.0147161770596504	0.606067134644495	0.0990152875146814	5	30	UNKNOWN	0.295833333333333
1.1.99.18	maltose	Trametes pubescens	1.92	24	41	17	0.0147161770596504	0.606067134644495	0.0990152875146814	5	30	UNKNOWN	0.295833333333333
1.1.99.18	maltose	Trametes villosa	2.08	24	41	17	0.0147161770596504	0.606067134644495	0.0990152875146814	5	30	UNKNOWN	0.295833333333333
1.1.99.18	thiocellobiose	Athelia rolfsii	27	25	29	4	0.000429239825970408	0.992284623352218	0.000146869885320952	3	NA	UNKNOWN	0.906542056074766
1.1.99.18	thiocellobiose	Trametes pubescens	19.4	25	29	4	0.000429239825970408	0.992284623352218	0.000146869885320952	3	30	UNKNOWN	0.906542056074766
1.1.99.18	thiocellobiose	Trametes villosa	21.4	25	29	4	0.000429239825970408	0.992284623352218	0.000146869885320952	3	30	UNKNOWN	0.906542056074766
1.1.99.18	xylobiose	Athelia rolfsii	27	25	41	16	-0.0598516110676086	0.0984174529737311	0.65203297090003	5	NA	UNKNOWN	7.72931366260423
1.1.99.18	xylobiose	Humicola insolens	1.559	25	41	16	-0.0598516110676086	0.0984174529737311	0.65203297090003	5	NA	UNKNOWN	7.72931366260423
1.1.99.18	xylobiose	Neurospora crassa	5.8	25	41	16	-0.0598516110676086	0.0984174529737311	0.65203297090003	5	30	UNKNOWN	7.72931366260423
1.1.99.18	xylobiose	Trametes pubescens	18.3	25	41	16	-0.0598516110676086	0.0984174529737311	0.65203297090003	5	30	UNKNOWN	7.72931366260423
1.1.99.18	xylobiose	Trametes villosa	17.2	25	41	16	-0.0598516110676086	0.0984174529737311	0.65203297090003	5	30	UNKNOWN	7.72931366260423
1.1.99.31	(s)-mandelate	Pseudomonas putida	222	24	28	4	0.164039223605531	NA	1	2	NA	UNKNOWN	0.220720720720721
1.1.99.31	(s)-mandelate	Rhodotorula graminis	49	24	28	4	0.164039223605531	NA	1	2	25	UNKNOWN	0.220720720720721
1.10.3.1	3,4-dihydroxyphenyl acetic acid	Agaricus bisporus	582.3	25	28	3	-0.231664837842701	0.128538981510646	0.959783915478321	3	NA	UNKNOWN	5.04330985915493
1.10.3.1	3,4-dihydroxyphenyl acetic acid	Neurospora crassa	850	25	28	3	-0.231664837842701	0.128538981510646	0.959783915478321	3	NA	UNKNOWN	5.04330985915493
1.10.3.1	3,4-dihydroxyphenyl acetic acid	Streptomyces glaucescens	142	25	28	3	-0.231664837842701	0.128538981510646	0.959783915478321	3	NA	UNKNOWN	5.04330985915493
1.10.3.1	3,4-dihydroxyphenyl propionic acid	Agaricus bisporus	553.5	25	28	3	0.173111154838563	NA	1	2	NA	UNKNOWN	0.302459016393443
1.10.3.1	3,4-dihydroxyphenyl propionic acid	Streptomyces glaucescens	1830	25	28	3	0.173111154838563	NA	1	2	NA	UNKNOWN	0.302459016393443
1.10.3.1	4-methylcatechol	Agaricus bisporus	841.8	25	28	3	0.14800231199938	NA	1	2	NA	UNKNOWN	0.35974358974359
1.10.3.1	4-methylcatechol	Streptomyces glaucescens	2340	25	28	3	0.14800231199938	NA	1	2	NA	UNKNOWN	0.35974358974359
1.10.3.1	catechol	Agaricus bisporus	877.8	25	28	3	-0.115599493627498	NA	1	2	NA	UNKNOWN	2.22227848101266
1.10.3.1	catechol	Streptomyces glaucescens	395	25	28	3	-0.115599493627498	NA	1	2	NA	UNKNOWN	2.22227848101266
1.10.3.1	chlorogenic acid	Agaricus bisporus	148.5	25	28	3	0.241047734364007	NA	1	2	NA	UNKNOWN	0.189171974522293
1.10.3.1	chlorogenic acid	Streptomyces glaucescens	785	25	28	3	0.241047734364007	NA	1	2	NA	UNKNOWN	0.189171974522293
1.10.3.1	d-dopa	Agaricus bisporus	107.4	25	28	3	-0.00547459206445338	0.975888029669931	0.00143382938935299	3	NA	UNKNOWN	1.21576086956522
1.10.3.1	d-dopa	Neurospora crassa	340	25	28	3	-0.00547459206445338	0.975888029669931	0.00143382938935299	3	NA	UNKNOWN	1.21576086956522
1.10.3.1	d-dopa	Streptomyces glaucescens	184	25	28	3	-0.00547459206445338	0.975888029669931	0.00143382938935299	3	NA	UNKNOWN	1.21576086956522
1.10.3.1	dopamine	Agaricus bisporus	439	25	28	3	-0.117714335146755	0.535448500194669	0.215808095971382	4	NA	UNKNOWN	1.77444951398532
1.10.3.1	dopamine	Neurospora crassa	1350	25	28	3	-0.117714335146755	0.535448500194669	0.215808095971382	4	NA	UNKNOWN	1.77444951398532
1.10.3.1	dopamine	Streptomyces antibioticus	133.2	25	28	3	-0.117714335146755	0.535448500194669	0.215808095971382	4	10	UNKNOWN	1.77444951398532
1.10.3.1	dopamine	Streptomyces glaucescens	875	25	28	3	-0.117714335146755	0.535448500194669	0.215808095971382	4	NA	UNKNOWN	1.77444951398532
1.10.3.1	l-dopa	Agaricus bisporus	107.4	25	28	3	0.0217473449012261	0.938889977272832	0.00373443487771503	4	NA	UNKNOWN	0.758438546766297
1.10.3.1	l-dopa	Neurospora crassa	1070	25	28	3	0.0217473449012261	0.938889977272832	0.00373443487771503	4	NA	UNKNOWN	0.758438546766297
1.10.3.1	l-dopa	Streptomyces antibioticus	107.4	25	28	3	0.0217473449012261	0.938889977272832	0.00373443487771503	4	10	UNKNOWN	0.758438546766297
1.10.3.1	l-dopa	Streptomyces glaucescens	1445	25	28	3	0.0217473449012261	0.938889977272832	0.00373443487771503	4	NA	UNKNOWN	0.758438546766297
1.10.3.1	tert-butylcatechol	Agaricus bisporus	641.8	25	28	3	0.23791279031485	NA	1	2	NA	UNKNOWN	0.193313253012048
1.10.3.1	tert-butylcatechol	Streptomyces glaucescens	3320	25	28	3	0.23791279031485	NA	1	2	NA	UNKNOWN	0.193313253012048
1.10.3.2	2-dianisidine	Pleurotus ostreatus	20.7	25	26	1	-0.461664303655836	NA	1	2	25	UNKNOWN	2.89510489510489
1.10.3.2	2-dianisidine	Trametes sanguinea	7.15	25	26	1	-0.461664303655836	NA	1	2	22	UNKNOWN	2.89510489510489
1.10.3.2	2,2'-azino-bis-(3-ethylbenzthiazoline-6-sulfonic acid)	Bacillus pumilus	209.6	24	34	10	-0.0484139292863776	0.672897240877129	0.0317519662149538	8	23	0	16.9147058823529
1.10.3.2	2,2'-azino-bis-(3-ethylbenzthiazoline-6-sulfonic acid)	Bacillus tequilensis	67.04	24	34	10	-0.0484139292863776	0.672897240877129	0.0317519662149538	8	85	UNKNOWN	16.9147058823529
1.10.3.2	2,2'-azino-bis-(3-ethylbenzthiazoline-6-sulfonic acid)	Cerrena unicolor	286.5	24	34	10	-0.0484139292863776	0.672897240877129	0.0317519662149538	8	25	UNKNOWN	16.9147058823529
1.10.3.2	2,2'-azino-bis-(3-ethylbenzthiazoline-6-sulfonic acid)	Coprinopsis cinerea	32.03	24	34	10	-0.0484139292863776	0.672897240877129	0.0317519662149538	8	37	UNKNOWN	16.9147058823529
1.10.3.2	2,2'-azino-bis-(3-ethylbenzthiazoline-6-sulfonic acid)	Coprinus comatus	2.476	24	34	10	-0.0484139292863776	0.672897240877129	0.0317519662149538	8	40	UNKNOWN	16.9147058823529
1.10.3.2	2,2'-azino-bis-(3-ethylbenzthiazoline-6-sulfonic acid)	Klebsiella pneumoniae	1.02	24	34	10	-0.0484139292863776	0.672897240877129	0.0317519662149538	8	35	UNKNOWN	16.9147058823529
1.10.3.2	2,2'-azino-bis-(3-ethylbenzthiazoline-6-sulfonic acid)	Streptomyces griseorubens	7.7	24	34	10	-0.0484139292863776	0.672897240877129	0.0317519662149538	8	25	UNKNOWN	16.9147058823529
1.10.3.2	2,2'-azino-bis-(3-ethylbenzthiazoline-6-sulfonic acid)	Streptomyces viridochromogenes	1.9	24	34	10	-0.0484139292863776	0.672897240877129	0.0317519662149538	8	NA	UNKNOWN	16.9147058823529
1.10.3.2	2,2'-azino-bis(3-ethyl-benzothiazoline-6-sulfonic acid)	Bacillus subtilis	322	24	43	19	-0.042964890840722	0.281662280687637	0.363660334731959	5	25	0	7.01067615658363
1.10.3.2	2,2'-azino-bis(3-ethyl-benzothiazoline-6-sulfonic acid)	Melanocarpus albomyces	28.1	24	43	19	-0.042964890840722	0.281662280687637	0.363660334731959	5	25	0	7.01067615658363
1.10.3.2	2,2'-azino-bis(3-ethyl-benzothiazoline-6-sulfonic acid)	Shigella dysenteriae	18.2	24	43	19	-0.042964890840722	0.281662280687637	0.363660334731959	5	25	0	7.01067615658363
1.10.3.2	2,2'-azino-bis(3-ethyl-benzothiazoline-6-sulfonic acid)	Trametes hirsuta	197	24	43	19	-0.042964890840722	0.281662280687637	0.363660334731959	5	25	UNKNOWN	7.01067615658363
1.10.3.2	2,2'-azino-bis(3-ethyl-benzothiazoline-6-sulfonic acid)	Trametes sanguinea	53.95	24	43	19	-0.042964890840722	0.281662280687637	0.363660334731959	5	22	UNKNOWN	7.01067615658363
1.10.3.2	2,2'-azino-bis(3-ethylbenzthiazoline-6-sulfonic acid)	Bacillus pumilus	291	24	43	19	0.0195031673518439	0.659962413523439	0.0224748962922754	11	22	UNKNOWN	1.08761467889908
1.10.3.2	2,2'-azino-bis(3-ethylbenzthiazoline-6-sulfonic acid)	Coprinopsis cinerea	4.22	24	43	19	0.0195031673518439	0.659962413523439	0.0224748962922754	11	30	UNKNOWN	1.08761467889908
1.10.3.2	2,2'-azino-bis(3-ethylbenzthiazoline-6-sulfonic acid)	Coprinus comatus	4.41	24	43	19	0.0195031673518439	0.659962413523439	0.0224748962922754	11	40	UNKNOWN	1.08761467889908
1.10.3.2	2,2'-azino-bis(3-ethylbenzthiazoline-6-sulfonic acid)	Fusarium solani	107.1	24	43	19	0.0195031673518439	0.659962413523439	0.0224748962922754	11	30	UNKNOWN	1.08761467889908
1.10.3.2	2,2'-azino-bis(3-ethylbenzthiazoline-6-sulfonic acid)	Ganoderma fornicatum	65.6	24	43	19	0.0195031673518439	0.659962413523439	0.0224748962922754	11	30	UNKNOWN	1.08761467889908
1.10.3.2	2,2'-azino-bis(3-ethylbenzthiazoline-6-sulfonic acid)	Melanocarpus albomyces	109	24	43	19	0.0195031673518439	0.659962413523439	0.0224748962922754	11	25	UNKNOWN	1.08761467889908
1.10.3.2	2,2'-azino-bis(3-ethylbenzthiazoline-6-sulfonic acid)	Pleurotus ostreatus	20	24	43	19	0.0195031673518439	0.659962413523439	0.0224748962922754	11	25	UNKNOWN	1.08761467889908
1.10.3.2	2,2'-azino-bis(3-ethylbenzthiazoline-6-sulfonic acid)	Podospora anserina	1372	24	43	19	0.0195031673518439	0.659962413523439	0.0224748962922754	11	37	UNKNOWN	1.08761467889908
1.10.3.2	2,2'-azino-bis(3-ethylbenzthiazoline-6-sulfonic acid)	Trametes cinnabarina	91.3	24	43	19	0.0195031673518439	0.659962413523439	0.0224748962922754	11	NA	0	1.08761467889908
1.10.3.2	2,2'-azino-bis(3-ethylbenzthiazoline-6-sulfonic acid)	Trametes hirsuta	196	24	43	19	0.0195031673518439	0.659962413523439	0.0224748962922754	11	25	UNKNOWN	1.08761467889908
1.10.3.2	2,2'-azino-bis(3-ethylbenzthiazoline-6-sulfonic acid)	Trametes versicolor	130	24	43	19	0.0195031673518439	0.659962413523439	0.0224748962922754	11	25	UNKNOWN	1.08761467889908
1.10.3.2	2,2'-azinobis(3-ethylbenzothiazoline-6-sulfonic acid)	Agaricus blazei	21	24	43	19	-0.00767019173162091	0.934232487956229	0.000905551560675846	10	NA	UNKNOWN	1.4367816091954
1.10.3.2	2,2'-azinobis(3-ethylbenzothiazoline-6-sulfonic acid)	Bacillus subtilis	22.4	24	43	19	-0.00767019173162091	0.934232487956229	0.000905551560675846	10	37	0	1.4367816091954
1.10.3.2	2,2'-azinobis(3-ethylbenzothiazoline-6-sulfonic acid)	Cyathus bulleri	204	24	43	19	-0.00767019173162091	0.934232487956229	0.000905551560675846	10	45	UNKNOWN	1.4367816091954
1.10.3.2	2,2'-azinobis(3-ethylbenzothiazoline-6-sulfonic acid)	Melanocarpus albomyces	78.3	24	43	19	-0.00767019173162091	0.934232487956229	0.000905551560675846	10	NA	UNKNOWN	1.4367816091954
1.10.3.2	2,2'-azinobis(3-ethylbenzothiazoline-6-sulfonic acid)	Pleurotus ostreatus	73300	24	43	19	-0.00767019173162091	0.934232487956229	0.000905551560675846	10	25	UNKNOWN	1.4367816091954
1.10.3.2	2,2'-azinobis(3-ethylbenzothiazoline-6-sulfonic acid)	Pleurotus pulmonarius	1520	24	43	19	-0.00767019173162091	0.934232487956229	0.000905551560675846	10	40	UNKNOWN	1.4367816091954
1.10.3.2	2,2'-azinobis(3-ethylbenzothiazoline-6-sulfonic acid)	Trametes cinnabarina	272	24	43	19	-0.00767019173162091	0.934232487956229	0.000905551560675846	10	65	UNKNOWN	1.4367816091954
1.10.3.2	2,2'-azinobis(3-ethylbenzothiazoline-6-sulfonic acid)	Trametes sanguinea	68.87	24	43	19	-0.00767019173162091	0.934232487956229	0.000905551560675846	10	25	UNKNOWN	1.4367816091954
1.10.3.2	2,2'-azinobis(3-ethylbenzothiazoline-6-sulfonic acid)	Trametes versicolor	0.1345	24	43	19	-0.00767019173162091	0.934232487956229	0.000905551560675846	10	NA	UNKNOWN	1.4367816091954
1.10.3.2	2,2'-azinobis(3-ethylbenzothiazoline-6-sulfonic acid)	Trichophyton rubrum	10.3	24	43	19	-0.00767019173162091	0.934232487956229	0.000905551560675846	10	20	UNKNOWN	1.4367816091954
1.10.3.2	2,6-dimethoxyphenol	Agaricus blazei	15	24	43	19	-0.0130278307029488	0.821574579016433	0.00260390693018871	22	NA	UNKNOWN	0.841968911917098
1.10.3.2	2,6-dimethoxyphenol	Aquisalibacillus elongatus	1009.4	24	43	19	-0.0130278307029488	0.821574579016433	0.00260390693018871	22	40	UNKNOWN	0.841968911917098
1.10.3.2	2,6-dimethoxyphenol	Bacillus licheniformis	2	24	43	19	-0.0130278307029488	0.821574579016433	0.00260390693018871	22	NA	UNKNOWN	0.841968911917098
1.10.3.2	2,6-dimethoxyphenol	Bacillus pumilus	17.1	24	43	19	-0.0130278307029488	0.821574579016433	0.00260390693018871	22	22	UNKNOWN	0.841968911917098
1.10.3.2	2,6-dimethoxyphenol	Bacillus subtilis	6.65	24	43	19	-0.0130278307029488	0.821574579016433	0.00260390693018871	22	25	0	0.841968911917098
1.10.3.2	2,6-dimethoxyphenol	Bacillus tequilensis	73.15	24	43	19	-0.0130278307029488	0.821574579016433	0.00260390693018871	22	85	UNKNOWN	0.841968911917098
1.10.3.2	2,6-dimethoxyphenol	Ceriporiopsis rivulosa	414	24	43	19	-0.0130278307029488	0.821574579016433	0.00260390693018871	22	25	UNKNOWN	0.841968911917098
1.10.3.2	2,6-dimethoxyphenol	Coprinopsis cinerea	2.3	24	43	19	-0.0130278307029488	0.821574579016433	0.00260390693018871	22	37	UNKNOWN	0.841968911917098
1.10.3.2	2,6-dimethoxyphenol	Cyathus bulleri	180	24	43	19	-0.0130278307029488	0.821574579016433	0.00260390693018871	22	45	UNKNOWN	0.841968911917098
1.10.3.2	2,6-dimethoxyphenol	Fusarium solani	121	24	43	19	-0.0130278307029488	0.821574579016433	0.00260390693018871	22	30	UNKNOWN	0.841968911917098
1.10.3.2	2,6-dimethoxyphenol	Ganoderma fornicatum	38.5	24	43	19	-0.0130278307029488	0.821574579016433	0.00260390693018871	22	30	UNKNOWN	0.841968911917098
1.10.3.2	2,6-dimethoxyphenol	Klebsiella pneumoniae	2.93	24	43	19	-0.0130278307029488	0.821574579016433	0.00260390693018871	22	70	UNKNOWN	0.841968911917098
1.10.3.2	2,6-dimethoxyphenol	Lentinus tigrinus	191.65	24	43	19	-0.0130278307029488	0.821574579016433	0.00260390693018871	22	55	UNKNOWN	0.841968911917098
1.10.3.2	2,6-dimethoxyphenol	Marinomonas mediterranea	1.74	24	43	19	-0.0130278307029488	0.821574579016433	0.00260390693018871	22	25	0	0.841968911917098
1.10.3.2	2,6-dimethoxyphenol	Melanocarpus albomyces	38.6	24	43	19	-0.0130278307029488	0.821574579016433	0.00260390693018871	22	25	0	0.841968911917098
1.10.3.2	2,6-dimethoxyphenol	Pleurotus ostreatus	10004.47	24	43	19	-0.0130278307029488	0.821574579016433	0.00260390693018871	22	25	UNKNOWN	0.841968911917098
1.10.3.2	2,6-dimethoxyphenol	Streptomyces griseorubens	0.058	24	43	19	-0.0130278307029488	0.821574579016433	0.00260390693018871	22	25	UNKNOWN	0.841968911917098
1.10.3.2	2,6-dimethoxyphenol	Streptomyces viridochromogenes	34.4	24	43	19	-0.0130278307029488	0.821574579016433	0.00260390693018871	22	NA	UNKNOWN	0.841968911917098
1.10.3.2	2,6-dimethoxyphenol	Trametes cinnabarina	21.35	24	43	19	-0.0130278307029488	0.821574579016433	0.00260390693018871	22	NA	0	0.841968911917098
1.10.3.2	2,6-dimethoxyphenol	Trametes hirsuta	50	24	43	19	-0.0130278307029488	0.821574579016433	0.00260390693018871	22	25	UNKNOWN	0.841968911917098
1.10.3.2	2,6-dimethoxyphenol	Trametes sanguinea	6.91	24	43	19	-0.0130278307029488	0.821574579016433	0.00260390693018871	22	25	UNKNOWN	0.841968911917098
1.10.3.2	2,6-dimethoxyphenol	Trametes versicolor	0.51	24	43	19	-0.0130278307029488	0.821574579016433	0.00260390693018871	22	30	0	0.841968911917098
1.10.3.2	4-hydroxy-3,5-dimethoxybenzaldehyde azine	Melanocarpus albomyces	140	24	43	19	0.00840540830287495	0.525598638207589	0.459833082117914	3	25	UNKNOWN	0.710714285714286
1.10.3.2	4-hydroxy-3,5-dimethoxybenzaldehyde azine	Trametes hirsuta	122	24	43	19	0.00840540830287495	0.525598638207589	0.459833082117914	3	25	UNKNOWN	0.710714285714286
1.10.3.2	4-hydroxy-3,5-dimethoxybenzaldehyde azine	Trametes versicolor	77	24	43	19	0.00840540830287495	0.525598638207589	0.459833082117914	3	25	UNKNOWN	0.710714285714286
1.10.3.2	catechol	Aquisalibacillus elongatus	412.5	24	43	19	0.0219729864079401	0.651573143201381	0.0440281595732568	7	40	UNKNOWN	1.30681818181818
1.10.3.2	catechol	Fusarium solani	44.9	24	43	19	0.0219729864079401	0.651573143201381	0.0440281595732568	7	30	UNKNOWN	1.30681818181818
1.10.3.2	catechol	Lentinus tigrinus	34.4	24	43	19	0.0219729864079401	0.651573143201381	0.0440281595732568	7	55	UNKNOWN	1.30681818181818
1.10.3.2	catechol	Marinomonas mediterranea	2.18	24	43	19	0.0219729864079401	0.651573143201381	0.0440281595732568	7	25	0	1.30681818181818
1.10.3.2	catechol	Melanocarpus albomyces	88	24	43	19	0.0219729864079401	0.651573143201381	0.0440281595732568	7	25	UNKNOWN	1.30681818181818
1.10.3.2	catechol	Trametes hirsuta	202	24	43	19	0.0219729864079401	0.651573143201381	0.0440281595732568	7	25	UNKNOWN	1.30681818181818
1.10.3.2	catechol	Trametes versicolor	115	24	43	19	0.0219729864079401	0.651573143201381	0.0440281595732568	7	25	UNKNOWN	1.30681818181818
1.10.3.2	dopamine	Melanocarpus albomyces	116	24	43	19	-0.0106688102308846	0.0127682016902243	0.999597800996901	3	25	UNKNOWN	1.5948275862069
1.10.3.2	dopamine	Trametes hirsuta	184	24	43	19	-0.0106688102308846	0.0127682016902243	0.999597800996901	3	25	UNKNOWN	1.5948275862069
1.10.3.2	dopamine	Trametes versicolor	186	24	43	19	-0.0106688102308846	0.0127682016902243	0.999597800996901	3	25	UNKNOWN	1.5948275862069
1.10.3.2	ferrocenemonocarboxylic acid	Melanocarpus albomyces	75	24	43	19	-0.00804410875655472	0.566245031743411	0.396692075289124	3	25	UNKNOWN	1.46666666666667
1.10.3.2	ferrocenemonocarboxylic acid	Trametes hirsuta	137	24	43	19	-0.00804410875655472	0.566245031743411	0.396692075289124	3	25	UNKNOWN	1.46666666666667
1.10.3.2	ferrocenemonocarboxylic acid	Trametes versicolor	83	24	43	19	-0.00804410875655472	0.566245031743411	0.396692075289124	3	25	UNKNOWN	1.46666666666667
1.10.3.2	ferrocyanide	Melanocarpus albomyces	64	24	43	19	-0.0198290070377574	0.383356802147601	0.679149558097871	3	25	UNKNOWN	2.5234375
1.10.3.2	ferrocyanide	Trametes hirsuta	108	24	43	19	-0.0198290070377574	0.383356802147601	0.679149558097871	3	25	UNKNOWN	2.5234375
1.10.3.2	ferrocyanide	Trametes versicolor	215	24	43	19	-0.0198290070377574	0.383356802147601	0.679149558097871	3	25	UNKNOWN	2.5234375
1.10.3.2	guaiacol	Agaricus blazei	159	24	43	19	0.0209652617054026	0.690119550042859	0.0108958461387916	17	NA	UNKNOWN	1.59463722397476
1.10.3.2	guaiacol	Aquisalibacillus elongatus	56.3	24	43	19	0.0209652617054026	0.690119550042859	0.0108958461387916	17	40	UNKNOWN	1.59463722397476
1.10.3.2	guaiacol	Aureobasidium pullulans	2.53	24	43	19	0.0209652617054026	0.690119550042859	0.0108958461387916	17	25	UNKNOWN	1.59463722397476
1.10.3.2	guaiacol	Bacillus pumilus	25.95	24	43	19	0.0209652617054026	0.690119550042859	0.0108958461387916	17	22	0	1.59463722397476
1.10.3.2	guaiacol	Bacillus tequilensis	62.96	24	43	19	0.0209652617054026	0.690119550042859	0.0108958461387916	17	85	UNKNOWN	1.59463722397476
1.10.3.2	guaiacol	Ceriporiopsis rivulosa	76.5	24	43	19	0.0209652617054026	0.690119550042859	0.0108958461387916	17	25	UNKNOWN	1.59463722397476
1.10.3.2	guaiacol	Coprinopsis cinerea	0.211	24	43	19	0.0209652617054026	0.690119550042859	0.0108958461387916	17	30	UNKNOWN	1.59463722397476
1.10.3.2	guaiacol	Coprinus comatus	0.307	24	43	19	0.0209652617054026	0.690119550042859	0.0108958461387916	17	40	UNKNOWN	1.59463722397476
1.10.3.2	guaiacol	Cyathus bulleri	50.55	24	43	19	0.0209652617054026	0.690119550042859	0.0108958461387916	17	45	UNKNOWN	1.59463722397476
1.10.3.2	guaiacol	Fusarium solani	28.4	24	43	19	0.0209652617054026	0.690119550042859	0.0108958461387916	17	30	UNKNOWN	1.59463722397476
1.10.3.2	guaiacol	Ganoderma fornicatum	5	24	43	19	0.0209652617054026	0.690119550042859	0.0108958461387916	17	30	UNKNOWN	1.59463722397476
1.10.3.2	guaiacol	Melanocarpus albomyces	31.7	24	43	19	0.0209652617054026	0.690119550042859	0.0108958461387916	17	NA	UNKNOWN	1.59463722397476
1.10.3.2	guaiacol	Pleurotus ostreatus	3.9	24	43	19	0.0209652617054026	0.690119550042859	0.0108958461387916	17	25	UNKNOWN	1.59463722397476
1.10.3.2	guaiacol	Pleurotus pulmonarius	310	24	43	19	0.0209652617054026	0.690119550042859	0.0108958461387916	17	40	UNKNOWN	1.59463722397476
1.10.3.2	guaiacol	Streptomyces viridochromogenes	8	24	43	19	0.0209652617054026	0.690119550042859	0.0108958461387916	17	NA	UNKNOWN	1.59463722397476
1.10.3.2	guaiacol	Trametes hirsuta	424	24	43	19	0.0209652617054026	0.690119550042859	0.0108958461387916	17	55	UNKNOWN	1.59463722397476
1.10.3.2	guaiacol	Trametes sanguinea	2.525	24	43	19	0.0209652617054026	0.690119550042859	0.0108958461387916	17	22	0	1.59463722397476
1.10.3.2	hydroquinone	Aquisalibacillus elongatus	443.8	24	30	6	-0.00180401646018721	NA	1	2	40	UNKNOWN	1.02523659305994
1.10.3.2	hydroquinone	Trametes hirsuta	455	24	30	6	-0.00180401646018721	NA	1	2	55	UNKNOWN	1.02523659305994
1.10.3.2	o-benzenediol	Pleurotus ostreatus	11.99	24	25	1	-1.52648586304227	NA	1	2	25	UNKNOWN	33.6113427856547
1.10.3.2	o-benzenediol	Trametes hirsuta	403	24	25	1	-1.52648586304227	NA	1	2	55	UNKNOWN	33.6113427856547
1.10.3.2	sinapic acid	Trametes cinnabarina	37.2	24	26	2	-0.595692449269316	NA	1	2	NA	0	15.5376344086022
1.10.3.2	sinapic acid	Trametes hirsuta	578	24	26	2	-0.595692449269316	NA	1	2	55	UNKNOWN	15.5376344086022
1.10.3.2	syringaldazine	Agaricus blazei	5	24	71	47	-0.0151249689319994	0.534306977741151	0.0303961778896186	15	NA	UNKNOWN	3.67245762711864
1.10.3.2	syringaldazine	Aquisalibacillus elongatus	918.8	24	71	47	-0.0151249689319994	0.534306977741151	0.0303961778896186	15	40	UNKNOWN	3.67245762711864
1.10.3.2	syringaldazine	Bacillus licheniformis	100	24	71	47	-0.0151249689319994	0.534306977741151	0.0303961778896186	15	NA	UNKNOWN	3.67245762711864
1.10.3.2	syringaldazine	Bacillus pumilus	35.45	24	71	47	-0.0151249689319994	0.534306977741151	0.0303961778896186	15	22	UNKNOWN	3.67245762711864
1.10.3.2	syringaldazine	Bacillus subtilis	49.2	24	71	47	-0.0151249689319994	0.534306977741151	0.0303961778896186	15	NA	0	3.67245762711864
1.10.3.2	syringaldazine	Ceriporiopsis rivulosa	203	24	71	47	-0.0151249689319994	0.534306977741151	0.0303961778896186	15	25	UNKNOWN	3.67245762711864
1.10.3.2	syringaldazine	Coprinus comatus	38.335	24	71	47	-0.0151249689319994	0.534306977741151	0.0303961778896186	15	40	UNKNOWN	3.67245762711864
1.10.3.2	syringaldazine	Haloferax volcanii	22	24	71	47	-0.0151249689319994	0.534306977741151	0.0303961778896186	15	45	UNKNOWN	3.67245762711864
1.10.3.2	syringaldazine	Melanocarpus albomyces	66.085	24	71	47	-0.0151249689319994	0.534306977741151	0.0303961778896186	15	25	0	3.67245762711864
1.10.3.2	syringaldazine	Pleurotus ostreatus	2830	24	71	47	-0.0151249689319994	0.534306977741151	0.0303961778896186	15	25	UNKNOWN	3.67245762711864
1.10.3.2	syringaldazine	Pleurotus pulmonarius	654	24	71	47	-0.0151249689319994	0.534306977741151	0.0303961778896186	15	40	UNKNOWN	3.67245762711864
1.10.3.2	syringaldazine	Podospora anserina	1.29	24	71	47	-0.0151249689319994	0.534306977741151	0.0303961778896186	15	37	UNKNOWN	3.67245762711864
1.10.3.2	syringaldazine	Streptomyces griseorubens	0.337	24	71	47	-0.0151249689319994	0.534306977741151	0.0303961778896186	15	25	UNKNOWN	3.67245762711864
1.10.3.2	syringaldazine	Thermus thermophilus	5.9	24	71	47	-0.0151249689319994	0.534306977741151	0.0303961778896186	15	30	UNKNOWN	3.67245762711864
1.10.3.2	syringaldazine	Trametes sanguinea	45.71	24	71	47	-0.0151249689319994	0.534306977741151	0.0303961778896186	15	25	UNKNOWN	3.67245762711864
1.10.3.2	violuric acid	Lentinus tigrinus	8.4	25	26	1	0.0757207139381182	NA	1	2	55	UNKNOWN	0.84
1.10.3.2	violuric acid	Trichophyton rubrum	10	25	26	1	0.0757207139381182	NA	1	2	20	UNKNOWN	0.84
1.11.1.11	ascorbate	Chlorella vulgaris	696	22	24	2	-1.55916668500488	NA	1	2	NA	UNKNOWN	1313.20754716981
1.11.1.11	ascorbate	Leishmania major	0.53	22	24	2	-1.55916668500488	NA	1	2	25	0	1313.20754716981
1.11.1.13	2,6-dimethoxyphenol	Bjerkandera adusta	195	24	25	1	-0.537935152092799	0.672216028396333	0.242489302179217	3	NA	UNKNOWN	1.80584816984234
1.11.1.13	2,6-dimethoxyphenol	Lentinus tigrinus	15.965	24	25	1	-0.537935152092799	0.672216028396333	0.242489302179217	3	NA	UNKNOWN	1.80584816984234
1.11.1.13	2,6-dimethoxyphenol	Pleurotus ostreatus	200	24	25	1	-0.537935152092799	0.672216028396333	0.242489302179217	3	NA	UNKNOWN	1.80584816984234
1.11.1.13	guaiacol	Bjerkandera adusta	23.1	24	25	1	-0.159500479715995	0.888451383938139	0.0303891802403997	3	NA	UNKNOWN	0.798893307971641
1.11.1.13	guaiacol	Lentinus tigrinus	4.83	24	25	1	-0.159500479715995	0.888451383938139	0.0303891802403997	3	NA	UNKNOWN	0.798893307971641
1.11.1.13	guaiacol	Phanerochaete chrysosporium	53	24	25	1	-0.159500479715995	0.888451383938139	0.0303891802403997	3	NA	UNKNOWN	0.798893307971641
1.11.1.13	h2o2	Bjerkandera adusta	225	24	26	2	0.0415122925646922	0.738117542590072	0.042920944913459	5	NA	UNKNOWN	0.825991189427313
1.11.1.13	h2o2	Lentinus tigrinus	121	24	26	2	0.0415122925646922	0.738117542590072	0.042920944913459	5	NA	UNKNOWN	0.825991189427313
1.11.1.13	h2o2	Phanerochaete chrysosporium	237	24	26	2	0.0415122925646922	0.738117542590072	0.042920944913459	5	NA	UNKNOWN	0.825991189427313
1.11.1.13	h2o2	Pleurotus ostreatus	165	24	26	2	0.0415122925646922	0.738117542590072	0.042920944913459	5	NA	UNKNOWN	0.825991189427313
1.11.1.13	h2o2	Trichophyton rubrum	272.4	24	26	2	0.0415122925646922	0.738117542590072	0.042920944913459	5	NA	UNKNOWN	0.825991189427313
1.11.1.13	mn2+	Bjerkandera adusta	150	24	26	2	0.15396185180594	0.0655074377372324	0.729248064429077	5	NA	UNKNOWN	0.492125984251968
1.11.1.13	mn2+	Lentinus tigrinus	242.4	24	26	2	0.15396185180594	0.0655074377372324	0.729248064429077	5	NA	UNKNOWN	0.492125984251968
1.11.1.13	mn2+	Phanerochaete chrysosporium	237	24	26	2	0.15396185180594	0.0655074377372324	0.729248064429077	5	NA	UNKNOWN	0.492125984251968
1.11.1.13	mn2+	Pleurotus ostreatus	165	24	26	2	0.15396185180594	0.0655074377372324	0.729248064429077	5	NA	UNKNOWN	0.492125984251968
1.11.1.13	mn2+	Trichophyton rubrum	304.8	24	26	2	0.15396185180594	0.0655074377372324	0.729248064429077	5	NA	UNKNOWN	0.492125984251968
1.11.1.13	veratryl alcohol	Bjerkandera adusta	22.415	24	25	1	-1.69732622942646	NA	1	2	NA	UNKNOWN	49.8111111111111
1.11.1.13	veratryl alcohol	Lentinus tigrinus	0.45	24	25	1	-1.69732622942646	NA	1	2	NA	UNKNOWN	49.8111111111111
1.11.1.14	2,4-dichlorophenol	Phanerochaete chrysosporium	37.15	25	27	2	-1.39590378385647	NA	1	2	NA	0	619.166666666667
1.11.1.14	2,4-dichlorophenol	Streptomyces griseosporeus	0.06	25	27	2	-1.39590378385647	NA	1	2	60	UNKNOWN	619.166666666667
1.11.1.14	h2o2	Phanerochaete chrysosporium	10.83	25	26	1	-0.70624885318658	NA	1	2	NA	0	5.08450704225352
1.11.1.14	h2o2	Trametes sanguinea	2.13	25	26	1	-0.70624885318658	NA	1	2	25	UNKNOWN	5.08450704225352
1.11.1.14	veratryl alcohol	Agaricus bisporus	0.12	25	26	1	0.220111924729546	0.921779958262097	0.0150206698278574	3	30	UNKNOWN	3.24882629107981
1.11.1.14	veratryl alcohol	Phanerochaete chrysosporium	13.72	25	26	1	0.220111924729546	0.921779958262097	0.0150206698278574	3	30	UNKNOWN	3.24882629107981
1.11.1.14	veratryl alcohol	Trametes sanguinea	2.13	25	26	1	0.220111924729546	0.921779958262097	0.0150206698278574	3	25	UNKNOWN	3.24882629107981
1.11.1.16	2,2'-azino-bis(3-ethylbenzothiazoline-6-sulfonic acid)	Bjerkandera fumosa	4.485	24	26	2	0.191919119842678	0.918382133752205	0.0163466773490004	3	NA	UNKNOWN	0.0157747357975567
1.11.1.16	2,2'-azino-bis(3-ethylbenzothiazoline-6-sulfonic acid)	Pleurotus eryngii	97.05	24	26	2	0.191919119842678	0.918382133752205	0.0163466773490004	3	25	UNKNOWN	0.0157747357975567
1.11.1.16	2,2'-azino-bis(3-ethylbenzothiazoline-6-sulfonic acid)	Pleurotus sapidus	12300	24	26	2	0.191919119842678	0.918382133752205	0.0163466773490004	3	30	UNKNOWN	0.0157747357975567
1.11.1.16	2,6-dimethoxyphenol	Bjerkandera fumosa	20.3	24	26	2	-0.0833601130815213	NA	1	2	NA	UNKNOWN	1.4679802955665
1.11.1.16	2,6-dimethoxyphenol	Pleurotus eryngii	29.8	24	26	2	-0.0833601130815213	NA	1	2	25	0	1.4679802955665
1.11.1.16	h2o2	Pleurotus eryngii	135	24	29	5	-0.180240632315281	0.740821427293626	0.156787003197548	3	NA	0	42.1875
1.11.1.16	h2o2	Pleurotus ostreatus	0.6	24	29	5	-0.180240632315281	0.740821427293626	0.156787003197548	3	25	UNKNOWN	42.1875
1.11.1.16	h2o2	Rhodococcus jostii	3.2	24	29	5	-0.180240632315281	0.740821427293626	0.156787003197548	3	25	0	42.1875
1.11.1.16	mn2+	Bjerkandera fumosa	3.9	24	26	2	-0.725164039065858	0.251545534006302	0.851832573119582	3	NA	UNKNOWN	28.2051282051282
1.11.1.16	mn2+	Pleurotus eryngii	110	24	26	2	-0.725164039065858	0.251545534006302	0.851832573119582	3	NA	0	28.2051282051282
1.11.1.16	mn2+	Pleurotus ostreatus	6.2	24	26	2	-0.725164039065858	0.251545534006302	0.851832573119582	3	25	UNKNOWN	28.2051282051282
1.11.1.16	reactive black 5	Bjerkandera adusta	4.8	24	25	1	1.0316934894322	0.0207901148179432	0.998933897074414	3	NA	UNKNOWN	0.0930555555555556
1.11.1.16	reactive black 5	Pleurotus eryngii	5.25	24	25	1	1.0316934894322	0.0207901148179432	0.998933897074414	3	25	UNKNOWN	0.0930555555555556
1.11.1.16	reactive black 5	Pleurotus ostreatus	54	24	25	1	1.0316934894322	0.0207901148179432	0.998933897074414	3	25	UNKNOWN	0.0930555555555556
1.11.1.16	syringol	Pleurotus eryngii	4.5	24	26	2	2.04159199425064	NA	1	2	NA	UNKNOWN	8.25688073394495e-05
1.11.1.16	syringol	Pleurotus sapidus	54500	24	26	2	2.04159199425064	NA	1	2	30	UNKNOWN	8.25688073394495e-05
1.11.1.16	veratryl alcohol	Bjerkandera fumosa	16.94	24	26	2	0.656713353666674	0.583133519105273	0.37089367560709	3	NA	UNKNOWN	0.00989523420782466
1.11.1.16	veratryl alcohol	Pleurotus eryngii	8	24	26	2	0.656713353666674	0.583133519105273	0.37089367560709	3	NA	UNKNOWN	0.00989523420782466
1.11.1.16	veratryl alcohol	Pleurotus sapidus	1600	24	26	2	0.656713353666674	0.583133519105273	0.37089367560709	3	30	UNKNOWN	0.00989523420782466
1.11.1.19	2,2'-azino-bis(3-ethylbenzothiazoline-6-sulfonic acid)	Auricularia auricula-judae	322	24	48	24	0.0477788186464917	0.394370144807435	0.122987555485486	8	30	UNKNOWN	0.621076923076923
1.11.1.19	2,2'-azino-bis(3-ethylbenzothiazoline-6-sulfonic acid)	Bjerkandera adusta	0.96	24	48	24	0.0477788186464917	0.394370144807435	0.122987555485486	8	30	UNKNOWN	0.621076923076923
1.11.1.19	2,2'-azino-bis(3-ethylbenzothiazoline-6-sulfonic acid)	Irpex lacteus	224	24	48	24	0.0477788186464917	0.394370144807435	0.122987555485486	8	NA	UNKNOWN	0.621076923076923
1.11.1.19	2,2'-azino-bis(3-ethylbenzothiazoline-6-sulfonic acid)	Pleurotus sapidus	375	24	48	24	0.0477788186464917	0.394370144807435	0.122987555485486	8	30	UNKNOWN	0.621076923076923
1.11.1.19	2,2'-azino-bis(3-ethylbenzothiazoline-6-sulfonic acid)	Pseudomonas putida	23	24	48	24	0.0477788186464917	0.394370144807435	0.122987555485486	8	25	0	0.621076923076923
1.11.1.19	2,2'-azino-bis(3-ethylbenzothiazoline-6-sulfonic acid)	Streptomyces avermitilis	1.21	24	48	24	0.0477788186464917	0.394370144807435	0.122987555485486	8	30	UNKNOWN	0.621076923076923
1.11.1.19	2,2'-azino-bis(3-ethylbenzothiazoline-6-sulfonic acid)	Thermomonospora curvata	260	24	48	24	0.0477788186464917	0.394370144807435	0.122987555485486	8	22	0	0.621076923076923
1.11.1.19	2,2'-azino-bis(3-ethylbenzothiazoline-6-sulfonic acid)	Vibrio cholerae	500	24	48	24	0.0477788186464917	0.394370144807435	0.122987555485486	8	25	UNKNOWN	0.621076923076923
1.11.1.19	2,4-dichlorophenol	Bjerkandera adusta	0.101	24	27	3	-0.0671825494968887	NA	1	2	30	UNKNOWN	1.59055118110236
1.11.1.19	2,4-dichlorophenol	Streptomyces griseosporeus	0.0635	24	27	3	-0.0671825494968887	NA	1	2	25	UNKNOWN	1.59055118110236
1.11.1.19	2,6-dimethoxyphenol	Auricularia auricula-judae	105	24	28	4	-0.950831309038465	0.0374829604147906	0.809685927901459	5	20	UNKNOWN	2100
1.11.1.19	2,6-dimethoxyphenol	Irpex lacteus	70.9	24	28	4	-0.950831309038465	0.0374829604147906	0.809685927901459	5	NA	UNKNOWN	2100
1.11.1.19	2,6-dimethoxyphenol	Pleurotus sapidus	60	24	28	4	-0.950831309038465	0.0374829604147906	0.809685927901459	5	30	UNKNOWN	2100
1.11.1.19	2,6-dimethoxyphenol	Pseudomonas putida	0.05	24	28	4	-0.950831309038465	0.0374829604147906	0.809685927901459	5	25	0	2100
1.11.1.19	2,6-dimethoxyphenol	Streptomyces avermitilis	0.097	24	28	4	-0.950831309038465	0.0374829604147906	0.809685927901459	5	30	UNKNOWN	2100
1.11.1.19	guaiacol	Pleurotus sapidus	74	26	48	22	-0.100341577752556	0.566932793460816	0.395635294960706	3	30	UNKNOWN	224.242424242424
1.11.1.19	guaiacol	Thermomonospora curvata	0.33	26	48	22	-0.100341577752556	0.566932793460816	0.395635294960706	3	22	0	224.242424242424
1.11.1.19	guaiacol	Vibrio cholerae	0.027	26	48	22	-0.100341577752556	0.566932793460816	0.395635294960706	3	25	UNKNOWN	224.242424242424
1.11.1.19	h2o2	Auricularia auricula-judae	253	24	48	24	-0.0401085278472073	0.208208149117385	0.459991624960315	5	20	UNKNOWN	9.37037037037037
1.11.1.19	h2o2	Geotrichum candidum	265	24	48	24	-0.0401085278472073	0.208208149117385	0.459991624960315	5	30	UNKNOWN	9.37037037037037
1.11.1.19	h2o2	Irpex lacteus	419	24	48	24	-0.0401085278472073	0.208208149117385	0.459991624960315	5	NA	UNKNOWN	9.37037037037037
1.11.1.19	h2o2	Pseudomonas putida	23	24	48	24	-0.0401085278472073	0.208208149117385	0.459991624960315	5	25	0	9.37037037037037
1.11.1.19	h2o2	Thermomonospora curvata	27	24	48	24	-0.0401085278472073	0.208208149117385	0.459991624960315	5	22	0	9.37037037037037
1.11.1.19	reactive black 5	Auricularia auricula-judae	6.8	24	25	1	0.243038048686294	NA	1	2	20	UNKNOWN	0.571428571428571
1.11.1.19	reactive black 5	Irpex lacteus	11.9	24	25	1	0.243038048686294	NA	1	2	NA	UNKNOWN	0.571428571428571
1.11.1.19	reactive blue 19	Auricularia auricula-judae	323	24	48	24	-0.0390870710374739	0.568623699226406	0.18608551286911	4	25	0	7.8780487804878
1.11.1.19	reactive blue 19	Irpex lacteus	79.9	24	48	24	-0.0390870710374739	0.568623699226406	0.18608551286911	4	NA	UNKNOWN	7.8780487804878
1.11.1.19	reactive blue 19	Thermomonospora curvata	41	24	48	24	-0.0390870710374739	0.568623699226406	0.18608551286911	4	22	0	7.8780487804878
1.11.1.19	reactive blue 19	Vibrio cholerae	1.3	24	48	24	-0.0390870710374739	0.568623699226406	0.18608551286911	4	25	UNKNOWN	7.8780487804878
1.11.1.19	reactive blue 5	Auricularia auricula-judae	114	24	48	24	-0.0427672240850486	0.660935558742897	0.0726858939896153	5	25	0	3.93103448275862
1.11.1.19	reactive blue 5	Geotrichum candidum	260	24	48	24	-0.0427672240850486	0.660935558742897	0.0726858939896153	5	30	UNKNOWN	3.93103448275862
1.11.1.19	reactive blue 5	Pleurotus sapidus	18	24	48	24	-0.0427672240850486	0.660935558742897	0.0726858939896153	5	30	UNKNOWN	3.93103448275862
1.11.1.19	reactive blue 5	Pseudomonas aeruginosa	0.0235	24	48	24	-0.0427672240850486	0.660935558742897	0.0726858939896153	5	30	UNKNOWN	3.93103448275862
1.11.1.19	reactive blue 5	Thermomonospora curvata	29	24	48	24	-0.0427672240850486	0.660935558742897	0.0726858939896153	5	22	0	3.93103448275862
1.11.1.19	veratryl alcohol	Auricularia auricula-judae	0.74	24	25	1	0.562132044428009	NA	1	2	20	UNKNOWN	0.274074074074074
1.11.1.19	veratryl alcohol	Irpex lacteus	2.7	24	25	1	0.562132044428009	NA	1	2	NA	UNKNOWN	0.274074074074074
1.11.1.21	2,2'-azino-bis(3-ethylbenzthiazoline-6-sulfonic acid)	Archaeoglobus fulgidus	17	28	81	53	-0.00910938519407683	0.741721609698231	0.0302550466878855	6	25	UNKNOWN	0.452941176470588
1.11.1.21	2,2'-azino-bis(3-ethylbenzthiazoline-6-sulfonic acid)	Burkholderia pseudomallei	7.9	28	81	53	-0.00910938519407683	0.741721609698231	0.0302550466878855	6	25	UNKNOWN	0.452941176470588
1.11.1.21	2,2'-azino-bis(3-ethylbenzthiazoline-6-sulfonic acid)	Escherichia coli	55.2	28	81	53	-0.00910938519407683	0.741721609698231	0.0302550466878855	6	23	UNKNOWN	0.452941176470588
1.11.1.21	2,2'-azino-bis(3-ethylbenzthiazoline-6-sulfonic acid)	Geobacillus stearothermophilus	11	28	81	53	-0.00910938519407683	0.741721609698231	0.0302550466878855	6	25	UNKNOWN	0.452941176470588
1.11.1.21	2,2'-azino-bis(3-ethylbenzthiazoline-6-sulfonic acid)	Mycobacterium tuberculosis	3300	28	81	53	-0.00910938519407683	0.741721609698231	0.0302550466878855	6	25	UNKNOWN	0.452941176470588
1.11.1.21	2,2'-azino-bis(3-ethylbenzthiazoline-6-sulfonic acid)	Rhodobacter capsulatus	7.7	28	81	53	-0.00910938519407683	0.741721609698231	0.0302550466878855	6	25	UNKNOWN	0.452941176470588
1.11.1.21	h2o2	Archaeoglobus fulgidus	11725	28	81	53	-0.00688095114008573	0.676185437338355	0.0377892693250202	7	37	UNKNOWN	0.884434968017058
1.11.1.21	h2o2	Bacillus pumilus	330500	28	81	53	-0.00688095114008573	0.676185437338355	0.0377892693250202	7	37	UNKNOWN	0.884434968017058
1.11.1.21	h2o2	Burkholderia pseudomallei	5680	28	81	53	-0.00688095114008573	0.676185437338355	0.0377892693250202	7	25	0	0.884434968017058
1.11.1.21	h2o2	Escherichia coli	5135	28	81	53	-0.00688095114008573	0.676185437338355	0.0377892693250202	7	23	0	0.884434968017058
1.11.1.21	h2o2	Geobacillus stearothermophilus	5950	28	81	53	-0.00688095114008573	0.676185437338355	0.0377892693250202	7	37	UNKNOWN	0.884434968017058
1.11.1.21	h2o2	Mycobacterium tuberculosis	4350	28	81	53	-0.00688095114008573	0.676185437338355	0.0377892693250202	7	23	0	0.884434968017058
1.11.1.21	h2o2	Rhodobacter capsulatus	10370	28	81	53	-0.00688095114008573	0.676185437338355	0.0377892693250202	7	37	UNKNOWN	0.884434968017058
1.11.1.21	o-dianisidine	Escherichia coli	58	36	37	1	-0.0732319135344228	NA	1	2	23	UNKNOWN	1.18367346938776
1.11.1.21	o-dianisidine	Mycobacterium tuberculosis	49	36	37	1	-0.0732319135344228	NA	1	2	37	0	1.18367346938776
1.11.1.21	pyrogallol	Escherichia coli	56	36	37	1	1.05115252244737	NA	1	2	23	UNKNOWN	0.0888888888888889
1.11.1.21	pyrogallol	Mycobacterium tuberculosis	630	36	37	1	1.05115252244737	NA	1	2	23	UNKNOWN	0.0888888888888889
1.11.1.24	cumene hydroperoxide	Rhodobacter sphaeroides	0.2775	27	37	10	0.151354775354784	0.121536384448025	0.963994418856761	3	25	UNKNOWN	0.0418367346938775
1.11.1.24	cumene hydroperoxide	Treponema pallidum	9.8	27	37	10	0.151354775354784	0.121536384448025	0.963994418856761	3	25	UNKNOWN	0.0418367346938775
1.11.1.24	cumene hydroperoxide	Xylella fastidiosa	0.41	27	37	10	0.151354775354784	0.121536384448025	0.963994418856761	3	37	UNKNOWN	0.0418367346938775
1.11.1.24	h2o2	Plasmodium falciparum	1.67	27	37	10	0.0857637763417087	0.241163456302429	0.414387470249003	5	30	UNKNOWN	0.117836100696304
1.11.1.24	h2o2	Rhodobacter sphaeroides	0.285	27	37	10	0.0857637763417087	0.241163456302429	0.414387470249003	5	25	UNKNOWN	0.117836100696304
1.11.1.24	h2o2	Toxoplasma gondii	0.83	27	37	10	0.0857637763417087	0.241163456302429	0.414387470249003	5	NA	UNKNOWN	0.117836100696304
1.11.1.24	h2o2	Treponema pallidum	17	27	37	10	0.0857637763417087	0.241163456302429	0.414387470249003	5	25	UNKNOWN	0.117836100696304
1.11.1.24	h2o2	Xylella fastidiosa	1.1	27	37	10	0.0857637763417087	0.241163456302429	0.414387470249003	5	37	UNKNOWN	0.117836100696304
1.11.1.24	t-butyl hydroperoxide	Treponema pallidum	20.9	27	37	10	0.101911629044707	NA	1	2	25	UNKNOWN	0.0956937799043062
1.11.1.24	t-butyl hydroperoxide	Xylella fastidiosa	2	27	37	10	0.101911629044707	NA	1	2	37	UNKNOWN	0.0956937799043062
1.11.1.28	h2o2	Mycobacterium tuberculosis	0.0865	27	37	10	-0.204207679317351	NA	1	2	25	UNKNOWN	110.173410404624
1.11.1.28	h2o2	Xylella fastidiosa	9.53	27	37	10	-0.204207679317351	NA	1	2	37	UNKNOWN	110.173410404624
1.11.1.28	tert-butyl hydroperoxide	Mycobacterium tuberculosis	0.0475	27	37	10	-0.257737084328947	NA	1	2	25	UNKNOWN	377.894736842105
1.11.1.28	tert-butyl hydroperoxide	Xylella fastidiosa	17.95	27	37	10	-0.257737084328947	NA	1	2	37	UNKNOWN	377.894736842105
1.11.1.5	ferrocytochrome c	Paracoccus denitrificans	17.2	28	30	2	-0.536223289460323	0.627648735573269	0.304821037236658	3	NA	UNKNOWN	51.5581395348837
1.11.1.5	ferrocytochrome c	Rhodobacter capsulatus	23.6	28	30	2	-0.536223289460323	0.627648735573269	0.304821037236658	3	NA	UNKNOWN	51.5581395348837
1.11.1.5	ferrocytochrome c	Saccharomyces cerevisiae	1750	28	30	2	-0.536223289460323	0.627648735573269	0.304821037236658	3	NA	UNKNOWN	51.5581395348837
1.11.1.5	h2o2	Geobacter sulfurreducens	15.5	28	30	2	0.278431621295354	NA	1	2	NA	UNKNOWN	0.27741935483871
1.11.1.5	h2o2	Nitrosomonas europaea	4.3	28	30	2	0.278431621295354	NA	1	2	23	0	0.27741935483871
1.11.1.6	h2o2	Escherichia coli	64	21	90	69	-0.0168002263119128	0.470976911059164	0.066778452444721	10	NA	UNKNOWN	29.3103448275862
1.11.1.6	h2o2	Gluconobacter oxydans	62800	21	90	69	-0.0168002263119128	0.470976911059164	0.066778452444721	10	NA	UNKNOWN	29.3103448275862
1.11.1.6	h2o2	Haloarcula marismortui	3000	21	90	69	-0.0168002263119128	0.470976911059164	0.066778452444721	10	25	UNKNOWN	29.3103448275862
1.11.1.6	h2o2	Komagataella pastoris	850000	21	90	69	-0.0168002263119128	0.470976911059164	0.066778452444721	10	NA	UNKNOWN	29.3103448275862
1.11.1.6	h2o2	Neurospora crassa	125000	21	90	69	-0.0168002263119128	0.470976911059164	0.066778452444721	10	NA	UNKNOWN	29.3103448275862
1.11.1.6	h2o2	Pyrobaculum calidifontis	29000	21	90	69	-0.0168002263119128	0.470976911059164	0.066778452444721	10	25	UNKNOWN	29.3103448275862
1.11.1.6	h2o2	Talaromyces piceae	2830000	21	90	69	-0.0168002263119128	0.470976911059164	0.066778452444721	10	NA	UNKNOWN	29.3103448275862
1.11.1.6	h2o2	Thermoascus aurantiacus	107000	21	90	69	-0.0168002263119128	0.470976911059164	0.066778452444721	10	30	UNKNOWN	29.3103448275862
1.11.1.6	h2o2	Xanthomonas campestris	255000	21	90	69	-0.0168002263119128	0.470976911059164	0.066778452444721	10	37	UNKNOWN	29.3103448275862
1.11.1.6	h2o2	Zavarzinia compransoris	23300	21	90	69	-0.0168002263119128	0.470976911059164	0.066778452444721	10	NA	UNKNOWN	29.3103448275862
1.11.1.7	cumene hydroperoxide	Escherichia coli	70.1	36	37	1	0.672795921911224	NA	1	2	25	UNKNOWN	0.212424242424242
1.11.1.7	cumene hydroperoxide	Mycobacterium avium	330	36	37	1	0.672795921911224	NA	1	2	NA	UNKNOWN	0.212424242424242
1.11.1.7	guaiacol	Plasmodium falciparum	1.3	28	37	9	0.084213055012635	NA	1	2	NA	UNKNOWN	0.174615384615385
1.11.1.7	guaiacol	Streptomyces lividans	0.227	28	37	9	0.084213055012635	NA	1	2	25	UNKNOWN	0.174615384615385
1.11.1.7	h2o2	Escherichia coli	76	25	37	12	0.170359438512198	0.250045770776228	0.85350254838814	3	25	UNKNOWN	0.0230769230769231
1.11.1.7	h2o2	Mycobacterium avium	13	25	37	12	0.170359438512198	0.250045770776228	0.85350254838814	3	NA	UNKNOWN	0.0230769230769231
1.11.1.7	h2o2	Neurospora crassa	0.3	25	37	12	0.170359438512198	0.250045770776228	0.85350254838814	3	25	UNKNOWN	0.0230769230769231
1.11.1.7	veratryl alcohol	Pleurotus eryngii	8	24	28	4	-0.247319033652056	NA	1	2	24	0	9.75609756097561
1.11.1.7	veratryl alcohol	Streptomyces lividans	0.82	24	28	4	-0.247319033652056	NA	1	2	25	UNKNOWN	9.75609756097561
1.12.2.1	ferricytochrome c3	Desulfomicrobium norvegicum	38	30	34	4	0.277603120852926	NA	1	2	NA	UNKNOWN	0.0775510204081633
1.12.2.1	ferricytochrome c3	Desulfovibrio vulgaris	490	30	34	4	0.277603120852926	NA	1	2	NA	UNKNOWN	0.0775510204081633
1.12.7.2	h2	Clostridium acetobutylicum	454	32	37	5	0.564527029835114	NA	1	2	35	UNKNOWN	0.00150440528634361
1.12.7.2	h2	Sporomusa sphaeroides	0.683	32	37	5	0.564527029835114	NA	1	2	NA	UNKNOWN	0.00150440528634361
1.12.98.1	coenzyme f420	Methanococcus voltae	17.5	33	62	29	0.0654894807968421	NA	1	2	NA	UNKNOWN	0.0126126126126126
1.12.98.1	coenzyme f420	Methanothermobacter thermautotrophicus	1387.5	33	62	29	0.0654894807968421	NA	1	2	NA	UNKNOWN	0.0126126126126126
1.12.99.6	cr6+	Desulfomicrobium norvegicum	0.23	30	37	7	-0.04490051012829	0.827259367926684	0.0718363217547979	3	NA	UNKNOWN	2.55555555555556
1.12.99.6	cr6+	Desulfovibrio fructosivorans	0.09	30	37	7	-0.04490051012829	0.827259367926684	0.0718363217547979	3	NA	UNKNOWN	2.55555555555556
1.12.99.6	cr6+	Desulfovibrio vulgaris	1.3	30	37	7	-0.04490051012829	0.827259367926684	0.0718363217547979	3	NA	UNKNOWN	2.55555555555556
1.13.11.1	3-methylcatechol	Acinetobacter radioresistens	1.59	27	34	7	-0.134497373629705	0.157865780425146	0.538899278150065	5	NA	0	9.65454545454545
1.13.11.1	3-methylcatechol	Pseudomonas aeruginosa	1.1	27	34	7	-0.134497373629705	0.157865780425146	0.538899278150065	5	NA	UNKNOWN	9.65454545454545
1.13.11.1	3-methylcatechol	Pseudomonas reinekei	1.55	27	34	7	-0.134497373629705	0.157865780425146	0.538899278150065	5	25	UNKNOWN	9.65454545454545
1.13.11.1	3-methylcatechol	Rhodococcus opacus	10.62	27	34	7	-0.134497373629705	0.157865780425146	0.538899278150065	5	25	UNKNOWN	9.65454545454545
1.13.11.1	3-methylcatechol	Rhodococcus rhodochrous	9.5	27	34	7	-0.134497373629705	0.157865780425146	0.538899278150065	5	NA	UNKNOWN	9.65454545454545
1.13.11.1	4-chlorocatechol	Acinetobacter radioresistens	0.83	27	30	3	0.176910951418966	0.163579874859708	0.52928932162586	5	NA	0	0.225
1.13.11.1	4-chlorocatechol	Cupriavidus necator	1	27	30	3	0.176910951418966	0.163579874859708	0.52928932162586	5	NA	UNKNOWN	0.225
1.13.11.1	4-chlorocatechol	Pseudomonas putida	1.3	27	30	3	0.176910951418966	0.163579874859708	0.52928932162586	5	NA	UNKNOWN	0.225
1.13.11.1	4-chlorocatechol	Pseudomonas reinekei	1.2	27	30	3	0.176910951418966	0.163579874859708	0.52928932162586	5	25	UNKNOWN	0.225
1.13.11.1	4-chlorocatechol	Rhodococcus opacus	0.27	27	30	3	0.176910951418966	0.163579874859708	0.52928932162586	5	25	UNKNOWN	0.225
1.13.11.1	4-fluorocatechol	Cupriavidus necator	4	28	29	1	0.070581074285708	NA	1	2	NA	UNKNOWN	0.85
1.13.11.1	4-fluorocatechol	Pseudomonas putida	3.4	28	29	1	0.070581074285708	NA	1	2	NA	UNKNOWN	0.85
1.13.11.1	4-methylcatechol	Acinetobacter radioresistens	5.45	26	34	8	-0.00609103731014609	0.837280078063118	0.00760826535629608	8	NA	0	1
1.13.11.1	4-methylcatechol	Candida albicans	5.6	26	34	8	-0.00609103731014609	0.837280078063118	0.00760826535629608	8	25	UNKNOWN	1
1.13.11.1	4-methylcatechol	Cupriavidus necator	4	26	34	8	-0.00609103731014609	0.837280078063118	0.00760826535629608	8	NA	UNKNOWN	1
1.13.11.1	4-methylcatechol	Pseudomonas aeruginosa	5.6	26	34	8	-0.00609103731014609	0.837280078063118	0.00760826535629608	8	NA	UNKNOWN	1
1.13.11.1	4-methylcatechol	Pseudomonas putida	12	26	34	8	-0.00609103731014609	0.837280078063118	0.00760826535629608	8	NA	UNKNOWN	1
1.13.11.1	4-methylcatechol	Pseudomonas reinekei	11.7	26	34	8	-0.00609103731014609	0.837280078063118	0.00760826535629608	8	25	UNKNOWN	1
1.13.11.1	4-methylcatechol	Rhodococcus opacus	7.32	26	34	8	-0.00609103731014609	0.837280078063118	0.00760826535629608	8	25	UNKNOWN	1
1.13.11.1	4-methylcatechol	Rhodococcus rhodochrous	6.3	26	34	8	-0.00609103731014609	0.837280078063118	0.00760826535629608	8	NA	UNKNOWN	1
1.13.11.1	catechol	Acinetobacter radioresistens	30.03	26	34	8	0.00701535251886447	0.921693430278648	0.00148118143061354	9	NA	UNKNOWN	0.277777777777778
1.13.11.1	catechol	Candida albicans	2	26	34	8	0.00701535251886447	0.921693430278648	0.00148118143061354	9	25	UNKNOWN	0.277777777777778
1.13.11.1	catechol	Cupriavidus necator	20	26	34	8	0.00701535251886447	0.921693430278648	0.00148118143061354	9	NA	UNKNOWN	0.277777777777778
1.13.11.1	catechol	Pseudomonas aeruginosa	7.2	26	34	8	0.00701535251886447	0.921693430278648	0.00148118143061354	9	NA	UNKNOWN	0.277777777777778
1.13.11.1	catechol	Pseudomonas fluorescens	26.7	26	34	8	0.00701535251886447	0.921693430278648	0.00148118143061354	9	NA	UNKNOWN	0.277777777777778
1.13.11.1	catechol	Pseudomonas putida	47	26	34	8	0.00701535251886447	0.921693430278648	0.00148118143061354	9	NA	UNKNOWN	0.277777777777778
1.13.11.1	catechol	Pseudomonas reinekei	8.1	26	34	8	0.00701535251886447	0.921693430278648	0.00148118143061354	9	25	UNKNOWN	0.277777777777778
1.13.11.1	catechol	Rhodococcus opacus	10.23	26	34	8	0.00701535251886447	0.921693430278648	0.00148118143061354	9	25	UNKNOWN	0.277777777777778
1.13.11.1	catechol	Rhodococcus rhodochrous	11.6	26	34	8	0.00701535251886447	0.921693430278648	0.00148118143061354	9	NA	UNKNOWN	0.277777777777778
1.13.11.15	3,4-dihydroxyphenylacetate	Arthrobacter globiformis	4.6	28	34	6	0.197300121783973	0.131026007067117	0.958234867511436	3	23	0	0.0730738681493249
1.13.11.15	3,4-dihydroxyphenylacetate	Brevibacterium fuscum	6.6	28	34	6	0.197300121783973	0.131026007067117	0.958234867511436	3	4	UNKNOWN	0.0730738681493249
1.13.11.15	3,4-dihydroxyphenylacetate	Pseudomonas aeruginosa	62.95	28	34	6	0.197300121783973	0.131026007067117	0.958234867511436	3	25	UNKNOWN	0.0730738681493249
1.13.11.18	s-sulfanylglutathione	Paraburkholderia phytofirmans	143	30	37	7	-0.191774668688887	NA	1	2	22	0	22
1.13.11.18	s-sulfanylglutathione	Staphylococcus aureus	6.5	30	37	7	-0.191774668688887	NA	1	2	25	0	22
1.13.11.2	3-methylcatechol	Escherichia coli	190	28	36	8	-0.0316051770785579	0.725420753915463	0.174773693142939	3	NA	UNKNOWN	2.57894736842105
1.13.11.2	3-methylcatechol	Pseudomonas putida	490	28	36	8	-0.0316051770785579	0.725420753915463	0.174773693142939	3	NA	UNKNOWN	2.57894736842105
1.13.11.2	3-methylcatechol	Pseudomonas stutzeri	118	28	36	8	-0.0316051770785579	0.725420753915463	0.174773693142939	3	NA	0	2.57894736842105
1.13.11.2	4-methylcatechol	Escherichia coli	930	28	36	8	-7.85046229341888e-17	NA	NA	2	NA	UNKNOWN	1
1.13.11.2	4-methylcatechol	Pseudomonas putida	930	28	36	8	-7.85046229341888e-17	NA	NA	2	NA	UNKNOWN	1
1.13.11.2	catechol	Escherichia coli	690	28	36	8	0.0090773402016436	0.934249962282201	0.0106288688488237	3	NA	UNKNOWN	1.34782608695652
1.13.11.2	catechol	Pseudomonas putida	930	28	36	8	0.0090773402016436	0.934249962282201	0.0106288688488237	3	NA	UNKNOWN	1.34782608695652
1.13.11.2	catechol	Pseudomonas stutzeri	190	28	36	8	0.0090773402016436	0.934249962282201	0.0106288688488237	3	NA	0	1.34782608695652
1.13.11.20	l-cysteine	Bacillus cereus	2	28	30	2	0.279162516983327	0.460161518994428	0.291425585574404	4	NA	UNKNOWN	0.263598326359833
1.13.11.20	l-cysteine	Bacillus subtilis	0.39	28	30	2	0.279162516983327	0.460161518994428	0.291425585574404	4	NA	UNKNOWN	0.263598326359833
1.13.11.20	l-cysteine	Cupriavidus necator	0.13	28	30	2	0.279162516983327	0.460161518994428	0.291425585574404	4	30	UNKNOWN	0.263598326359833
1.13.11.20	l-cysteine	Streptomyces coelicolor	0.315	28	30	2	0.279162516983327	0.460161518994428	0.291425585574404	4	NA	UNKNOWN	0.263598326359833
1.13.11.24	quercetin	Bacillus subtilis	6.7	24	30	6	-0.232643466187863	NA	1	2	NA	UNKNOWN	24.8805970149254
1.13.11.24	quercetin	Penicillium olsonii	166.7	24	30	6	-0.232643466187863	NA	1	2	25	UNKNOWN	24.8805970149254
1.13.11.27	4-hydroxyphenylpyruvate	Picrophilus torridus	9.9	27	55	28	0.00582593863897549	NA	1	2	50	UNKNOWN	0.686868686868687
1.13.11.27	4-hydroxyphenylpyruvate	Streptomyces avermitilis	6.8	27	55	28	0.00582593863897549	NA	1	2	25	0	0.686868686868687
1.13.11.3	3,4-dihydroxybenzoate	Brevibacterium fuscum	417	28	34	6	0.330154862531006	0.387015394948084	0.67377249380716	3	NA	UNKNOWN	0.00567282321899736
1.13.11.3	3,4-dihydroxybenzoate	Pseudomonas aeruginosa	758	28	34	6	0.330154862531006	0.387015394948084	0.67377249380716	3	NA	UNKNOWN	0.00567282321899736
1.13.11.3	3,4-dihydroxybenzoate	Pseudomonas putida	4.3	28	34	6	0.330154862531006	0.387015394948084	0.67377249380716	3	55	UNKNOWN	0.00567282321899736
1.13.11.3	o2	Brevibacterium fuscum	69.5	28	30	2	0.00473794594193851	NA	1	2	NA	UNKNOWN	0.97841726618705
1.13.11.3	o2	Pseudomonas putida	68	28	30	2	0.00473794594193851	NA	1	2	NA	0	0.97841726618705
1.13.11.37	hydroxyquinol	Burkholderia cepacia	6.35	28	30	2	-0.127065563022249	NA	1	2	NA	UNKNOWN	1.79527559055118
1.13.11.37	hydroxyquinol	Streptomyces rochei	11.4	28	30	2	-0.127065563022249	NA	1	2	NA	UNKNOWN	1.79527559055118
1.13.11.49	chlorite	Dechloromonas agitata	7550	27	34	7	0.0530476763807228	0.82028148236838	0.0200577757658611	5	NA	UNKNOWN	0.102702702702703
1.13.11.49	chlorite	Dechloromonas aromatica	2e+05	27	34	7	0.0530476763807228	0.82028148236838	0.0200577757658611	5	4	UNKNOWN	0.102702702702703
1.13.11.49	chlorite	Ideonella dechloratans	1800	27	34	7	0.0530476763807228	0.82028148236838	0.0200577757658611	5	NA	UNKNOWN	0.102702702702703
1.13.11.49	chlorite	Klebsiella pneumoniae	1900	27	34	7	0.0530476763807228	0.82028148236838	0.0200577757658611	5	20	UNKNOWN	0.102702702702703
1.13.11.49	chlorite	Nitrobacter winogradskyi	190	27	34	7	0.0530476763807228	0.82028148236838	0.0200577757658611	5	30	UNKNOWN	0.102702702702703
1.13.11.60	linoleate	Aspergillus nidulans	6.3	24	31	7	-0.0743189434321446	0.00849933959151807	0.999821768560626	3	24	UNKNOWN	3.3
1.13.11.60	linoleate	Colletotrichum gloeosporioides	20.79	24	31	7	-0.0743189434321446	0.00849933959151807	0.999821768560626	3	40	UNKNOWN	3.3
1.13.11.60	linoleate	Gaeumannomyces graminis	15	24	31	7	-0.0743189434321446	0.00849933959151807	0.999821768560626	3	0	UNKNOWN	3.3
1.13.11.60	oleate	Aspergillus nidulans	4.95	24	31	7	-0.0694420003374951	NA	1	2	24	UNKNOWN	3.06262626262626
1.13.11.60	oleate	Colletotrichum gloeosporioides	15.16	24	31	7	-0.0694420003374951	NA	1	2	40	UNKNOWN	3.06262626262626
1.13.11.60	palmitoleate	Aspergillus nidulans	3.5	24	31	7	-0.0815537673374727	NA	1	2	24	UNKNOWN	3.72285714285714
1.13.11.60	palmitoleate	Colletotrichum gloeosporioides	13.03	24	31	7	-0.0815537673374727	NA	1	2	40	UNKNOWN	3.72285714285714
1.13.11.80	(3,5-dihydroxyphenyl)acetyl-coa	Amycolatopsis orientalis	0.17	26	28	2	0.295979832211819	NA	1	2	24	UNKNOWN	0.255882352941176
1.13.11.80	(3,5-dihydroxyphenyl)acetyl-coa	Streptomyces toyocaensis	0.0435	26	28	2	0.295979832211819	NA	1	2	24	UNKNOWN	0.255882352941176
1.13.11.80	phenylacetyl-coa	Amycolatopsis orientalis	0.017	26	28	2	-0.287865526302807	NA	1	2	24	UNKNOWN	3.76470588235294
1.13.11.80	phenylacetyl-coa	Streptomyces toyocaensis	0.064	26	28	2	-0.287865526302807	NA	1	2	24	0	3.76470588235294
1.13.11.88	isoeugenol	Pseudomonas nitroreducens	3.8	28	29	1	-0.134546163128425	NA	1	2	30	UNKNOWN	1.36315789473684
1.13.11.88	isoeugenol	Pseudomonas putida	5.18	28	29	1	-0.134546163128425	NA	1	2	30	UNKNOWN	1.36315789473684
1.13.12.16	ethyl nitronate	Cyberlindnera saturnus	840	24	25	1	-1.19188552623891	NA	1	2	30	UNKNOWN	15.5555555555556
1.13.12.16	ethyl nitronate	Neurospora crassa	54	24	25	1	-1.19188552623891	NA	1	2	30	UNKNOWN	15.5555555555556
1.13.12.16	ethylnitronate	Neurospora crassa	36.6	25	34	9	0.108954106550652	NA	1	2	30	0	0.104571428571429
1.13.12.16	ethylnitronate	Pseudomonas aeruginosa	350	25	34	9	0.108954106550652	NA	1	2	30	UNKNOWN	0.104571428571429
1.13.12.16	propionate-3-nitronate	Cyberlindnera saturnus	775	24	34	10	0.0346970182506801	0.415057703474033	0.631849094940162	3	30	UNKNOWN	0.596153846153846
1.13.12.16	propionate-3-nitronate	Neurospora crassa	430	24	34	10	0.0346970182506801	0.415057703474033	0.631849094940162	3	30	UNKNOWN	0.596153846153846
1.13.12.16	propionate-3-nitronate	Pseudomonas aeruginosa	1300	24	34	10	0.0346970182506801	0.415057703474033	0.631849094940162	3	30	UNKNOWN	0.596153846153846
1.13.12.16	propyl-1-nitronate	Neurospora crassa	60	25	34	9	0.141229641365171	NA	1	2	30	UNKNOWN	0.0535714285714286
1.13.12.16	propyl-1-nitronate	Pseudomonas aeruginosa	1120	25	34	9	0.141229641365171	NA	1	2	30	UNKNOWN	0.0535714285714286
1.14.11.55	ectoine	Acidiphilium cryptum	3.4	29	34	5	0.131981240809977	0.108210866782603	0.432811581995871	7	32	UNKNOWN	0.155844155844156
1.14.11.55	ectoine	Alkalilimnicola ehrlichii	1.2	29	34	5	0.131981240809977	0.108210866782603	0.432811581995871	7	32	UNKNOWN	0.155844155844156
1.14.11.55	ectoine	Halomonas elongata	2.8	29	34	5	0.131981240809977	0.108210866782603	0.432811581995871	7	32	UNKNOWN	0.155844155844156
1.14.11.55	ectoine	Paenibacillus lautus	1.6	29	34	5	0.131981240809977	0.108210866782603	0.432811581995871	7	32	UNKNOWN	0.155844155844156
1.14.11.55	ectoine	Pseudomonas stutzeri	8.9	29	34	5	0.131981240809977	0.108210866782603	0.432811581995871	7	32	UNKNOWN	0.155844155844156
1.14.11.55	ectoine	Sphingopyxis alaskensis	1.2	29	34	5	0.131981240809977	0.108210866782603	0.432811581995871	7	32	UNKNOWN	0.155844155844156
1.14.11.55	ectoine	Virgibacillus salexigens	7.7	29	34	5	0.131981240809977	0.108210866782603	0.432811581995871	7	32	UNKNOWN	0.155844155844156
1.14.11.56	l-proline	Mesorhizobium loti	24	26	27	1	0.0177287669604322	NA	1	2	25	UNKNOWN	0.96
1.14.11.56	l-proline	Sinorhizobium meliloti	25	26	27	1	0.0177287669604322	NA	1	2	25	UNKNOWN	0.96
1.14.11.6	5-formyluracil	Neurospora crassa	0.765	24	25	1	-0.169417008329803	NA	1	2	25	0	1.47712418300654
1.14.11.6	5-formyluracil	Rhodotorula glutinis	1.13	24	25	1	-0.169417008329803	NA	1	2	30	0	1.47712418300654
1.14.11.6	thymine	Neurospora crassa	0.416	24	25	1	-1.33078437341014	NA	1	2	25	0	21.4182692307692
1.14.11.6	thymine	Rhodotorula glutinis	8.91	24	25	1	-1.33078437341014	NA	1	2	30	0	21.4182692307692
1.14.12.10	benzoate	Acinetobacter calcoaceticus	8.6	28	33	5	-0.266862690499243	NA	1	2	25	UNKNOWN	21.593023255814
1.14.12.10	benzoate	Pseudomonas putida	185.7	28	33	5	-0.266862690499243	NA	1	2	NA	UNKNOWN	21.593023255814
1.14.12.18	biphenyl	Pandoraea pnomenusa	4.1	30	37	7	0.183328776483931	0.2244248729032	0.880789078137215	3	25	UNKNOWN	0.0626829268292683
1.14.12.18	biphenyl	Paraburkholderia xenovorans	0.4	30	37	7	0.183328776483931	0.2244248729032	0.880789078137215	3	25	UNKNOWN	0.0626829268292683
1.14.12.18	biphenyl	Pseudomonas oleovorans	0.114	30	37	7	0.183328776483931	0.2244248729032	0.880789078137215	3	NA	UNKNOWN	0.0626829268292683
1.14.13.114	6-hydroxynicotinate	Bordetella bronchiseptica	4.2	28	36	8	0.0351033261969618	NA	1	2	25	UNKNOWN	0.523809523809524
1.14.13.114	6-hydroxynicotinate	Pseudomonas putida	2.2	28	36	8	0.0351033261969618	NA	1	2	25	UNKNOWN	0.523809523809524
1.14.13.114	nadh	Bordetella bronchiseptica	4.2	28	36	8	0.0351033261969618	NA	1	2	25	UNKNOWN	0.523809523809524
1.14.13.114	nadh	Pseudomonas putida	2.2	28	36	8	0.0351033261969618	NA	1	2	25	UNKNOWN	0.523809523809524
1.14.13.195	l-ornithine	Aspergillus fumigatus	0.605	26	27	1	-0.267207621992183	NA	1	2	25	0	1.85015290519878
1.14.13.195	l-ornithine	Saccharopolyspora erythraea	0.327	26	27	1	-0.267207621992183	NA	1	2	25	UNKNOWN	1.85015290519878
1.14.13.196	l-ornithine	Amycolatopsis alba	0.27	26	28	2	-0.133803120088516	NA	1	2	NA	UNKNOWN	1.85185185185185
1.14.13.196	l-ornithine	Aspergillus fumigatus	0.5	26	28	2	-0.133803120088516	NA	1	2	25	0	1.85185185185185
1.14.13.2	4-hydroxybenzoate	Corynebacterium glutamicum	2.8	28	34	6	-0.109523143215012	0.633714423474821	0.296084962333662	3	25	0	4.54086781029263
1.14.13.2	4-hydroxybenzoate	Pseudomonas aeruginosa	9.91	28	34	6	-0.109523143215012	0.633714423474821	0.296084962333662	3	NA	0	4.54086781029263
1.14.13.2	4-hydroxybenzoate	Pseudomonas fluorescens	45	28	34	6	-0.109523143215012	0.633714423474821	0.296084962333662	3	NA	UNKNOWN	4.54086781029263
1.14.13.2	nadph	Corynebacterium glutamicum	7.8	28	31	3	-0.280099719044163	NA	1	2	25	0	6.92307692307692
1.14.13.2	nadph	Pseudomonas fluorescens	54	28	31	3	-0.280099719044163	NA	1	2	NA	UNKNOWN	6.92307692307692
1.14.13.22	2-butanone	Acinetobacter calcoaceticus	0.29	33	47	14	0.00997585667350044	NA	1	2	25	0	0.725
1.14.13.22	2-butanone	Thermocrispum municipale	0.4	33	47	14	0.00997585667350044	NA	1	2	25	UNKNOWN	0.725
1.14.13.22	acetophenone	Acinetobacter calcoaceticus	0.4	33	47	14	-0.0430042850948545	NA	1	2	25	UNKNOWN	4
1.14.13.22	acetophenone	Thermocrispum municipale	0.1	33	47	14	-0.0430042850948545	NA	1	2	25	UNKNOWN	4
1.14.13.22	bicyclo[3.2.0]hept-2-en-6-one	Acinetobacter calcoaceticus	4	33	47	14	-0.0215021425474272	NA	1	2	25	UNKNOWN	2
1.14.13.22	bicyclo[3.2.0]hept-2-en-6-one	Thermocrispum municipale	2	33	47	14	-0.0215021425474272	NA	1	2	25	UNKNOWN	2
1.14.13.22	cyclobutanone	Acinetobacter calcoaceticus	4	33	47	14	-0.0215021425474272	NA	1	2	25	UNKNOWN	2
1.14.13.22	cyclobutanone	Thermocrispum municipale	2	33	47	14	-0.0215021425474272	NA	1	2	25	UNKNOWN	2
1.14.13.22	cyclohexanone	Acinetobacter calcoaceticus	6	33	47	14	-0.034080089622833	NA	1	2	25	UNKNOWN	3
1.14.13.22	cyclohexanone	Thermocrispum municipale	2	33	47	14	-0.034080089622833	NA	1	2	25	UNKNOWN	3
1.14.13.22	cyclopentanone	Acinetobacter calcoaceticus	1	33	47	14	0.0215021425474272	NA	1	2	25	UNKNOWN	0.5
1.14.13.22	cyclopentanone	Thermocrispum municipale	2	33	47	14	0.0215021425474272	NA	1	2	25	UNKNOWN	0.5
1.14.13.22	phenylacetone	Acinetobacter calcoaceticus	1	33	47	14	0	NA	NA	2	25	UNKNOWN	1
1.14.13.22	phenylacetone	Thermocrispum municipale	1	33	47	14	0	NA	NA	2	25	UNKNOWN	1
1.14.13.22	thioanisole	Acinetobacter calcoaceticus	3	33	47	14	-0.0125779470754058	NA	1	2	25	UNKNOWN	1.5
1.14.13.22	thioanisole	Thermocrispum municipale	2	33	47	14	-0.0125779470754058	NA	1	2	25	UNKNOWN	1.5
1.14.13.7	phenol	Acinetobacter radioresistens	1980	29	30	1	-3.48175200898645	NA	1	2	NA	UNKNOWN	3032.15926493109
1.14.13.7	phenol	Pseudomonas stutzeri	0.653	29	30	1	-3.48175200898645	NA	1	2	NA	UNKNOWN	3032.15926493109
1.14.13.70	lanosterol	Candida albicans	0.55	26	30	4	-0.315810358693645	NA	1	2	NA	UNKNOWN	18.3333333333333
1.14.13.70	lanosterol	Malassezia globosa	0.03	26	30	4	-0.315810358693645	NA	1	2	37	UNKNOWN	18.3333333333333
1.14.13.92	2-dodecanone	Mycobacterium tuberculosis	0.023	37	50	13	0.0769230769230768	NA	1	2	25	UNKNOWN	0.1
1.14.13.92	2-dodecanone	Thermobifida fusca	0.23	37	50	13	0.0769230769230768	NA	1	2	30	UNKNOWN	0.1
1.14.13.92	benzylacetone	Mycobacterium tuberculosis	0.021	37	50	13	0.148696400797645	NA	1	2	25	UNKNOWN	0.0116666666666667
1.14.13.92	benzylacetone	Thermobifida fusca	1.8	37	50	13	0.148696400797645	NA	1	2	30	UNKNOWN	0.0116666666666667
1.14.13.92	phenylacetone	Mycobacterium tuberculosis	0.1385	37	50	13	0.0959781777664664	NA	1	2	25	UNKNOWN	0.056530612244898
1.14.13.92	phenylacetone	Thermobifida fusca	2.45	37	50	13	0.0959781777664664	NA	1	2	NA	0	0.056530612244898
1.14.14.1	nadph	Bacillus megaterium	0.45	28	30	2	-0.726148835497318	NA	1	2	NA	0	28.3333333333333
1.14.14.1	nadph	Rhodococcus ruber	12.75	28	30	2	-0.726148835497318	NA	1	2	25	UNKNOWN	28.3333333333333
1.14.14.154	lanosterol	Candida albicans	0.55	26	30	4	-0.315810358693645	NA	1	2	NA	UNKNOWN	18.3333333333333
1.14.14.154	lanosterol	Malassezia globosa	0.03	26	30	4	-0.315810358693645	NA	1	2	37	UNKNOWN	18.3333333333333
1.14.14.9	4-hydroxyphenylacetate	Acinetobacter baumannii	366	28	33	5	0.528567216797525	NA	1	2	NA	0	0.00227595628415301
1.14.14.9	4-hydroxyphenylacetate	Pseudomonas putida	0.833	28	33	5	0.528567216797525	NA	1	2	NA	UNKNOWN	0.00227595628415301
1.14.15.30	1,4-androstadiene-3,17-dione	Mycobacterium tuberculosis	0.8	29	37	8	-0.0121137516260071	NA	1	2	25	UNKNOWN	1.25
1.14.15.30	1,4-androstadiene-3,17-dione	Rhodococcus rhodochrous	1	29	37	8	-0.0121137516260071	NA	1	2	22	UNKNOWN	1.25
1.14.15.30	androsta-1,4-diene-3,17-dione	Mycobacterium tuberculosis	0.8	29	37	8	-0.0121137516260071	NA	1	2	22	UNKNOWN	1.25
1.14.15.30	androsta-1,4-diene-3,17-dione	Rhodococcus rhodochrous	1	29	37	8	-0.0121137516260071	NA	1	2	22	UNKNOWN	1.25
1.14.15.30	o2	Mycobacterium tuberculosis	4.75	29	37	8	0.0724729495771013	NA	1	2	22	UNKNOWN	0.263157894736842
1.14.15.30	o2	Rhodococcus rhodochrous	1.25	29	37	8	0.0724729495771013	NA	1	2	22	UNKNOWN	0.263157894736842
1.14.16.1	l-phenylalanine	Chromobacterium violaceum	9.965	23	31	8	0.0134721131672039	NA	1	2	30	0	0.780230807827396
1.14.16.1	l-phenylalanine	Dictyostelium discoideum	7.775	23	31	8	0.0134721131672039	NA	1	2	37	0	0.780230807827396
1.14.18.1	3,4-dihydroxyphenylacetic acid	Agaricus bisporus	433.1	25	28	3	-0.194503246748807	NA	1	2	NA	UNKNOWN	3.83274336283186
1.14.18.1	3,4-dihydroxyphenylacetic acid	Streptomyces antibioticus	113	25	28	3	-0.194503246748807	NA	1	2	37	UNKNOWN	3.83274336283186
1.14.18.1	4-chlorophenol	Agaricus bisporus	4.6	25	28	3	0.0284767317748754	NA	1	2	NA	UNKNOWN	0.821428571428571
1.14.18.1	4-chlorophenol	Streptomyces antibioticus	5.6	25	28	3	0.0284767317748754	NA	1	2	25	UNKNOWN	0.821428571428571
1.14.18.1	4-fluorophenol	Agaricus bisporus	10.54	25	28	3	-0.000550437268863144	NA	1	2	NA	UNKNOWN	1.00380952380952
1.14.18.1	4-fluorophenol	Streptomyces antibioticus	10.5	25	28	3	-0.000550437268863144	NA	1	2	NA	UNKNOWN	1.00380952380952
1.14.18.1	4-hydroxyphenyl propionic acid	Agaricus bisporus	66.7	25	28	3	0.100992988149419	NA	1	2	NA	UNKNOWN	0.497761194029851
1.14.18.1	4-hydroxyphenyl propionic acid	Streptomyces glaucescens	134	25	28	3	0.100992988149419	NA	1	2	NA	UNKNOWN	0.497761194029851
1.14.18.1	4-hydroxyphenyl acetic acid	Agaricus bisporus	44.3	25	28	3	-0.111250681814948	0.698349985953605	0.208208152342043	3	NA	UNKNOWN	3.01536885245902
1.14.18.1	4-hydroxyphenyl acetic acid	Neurospora crassa	250	25	28	3	-0.111250681814948	0.698349985953605	0.208208152342043	3	NA	UNKNOWN	3.01536885245902
1.14.18.1	4-hydroxyphenyl acetic acid	Streptomyces glaucescens	48.8	25	28	3	-0.111250681814948	0.698349985953605	0.208208152342043	3	NA	UNKNOWN	3.01536885245902
1.14.18.1	4-tert-butylcatechol	Agaricus bisporus	640.1	25	28	3	0.137078705672705	NA	1	2	NA	UNKNOWN	0.387939393939394
1.14.18.1	4-tert-butylcatechol	Streptomyces antibioticus	1650	25	28	3	0.137078705672705	NA	1	2	37	UNKNOWN	0.387939393939394
1.14.18.1	catechol	Agaricus bisporus	977.05	25	28	3	-0.362275600692793	NA	1	2	NA	UNKNOWN	12.213125
1.14.18.1	catechol	Streptomyces antibioticus	80	25	28	3	-0.362275600692793	NA	1	2	37	UNKNOWN	12.213125
1.14.18.1	dopamine	Agaricus bisporus	2540	24	28	4	-0.252350691988642	0.267559512183041	0.833521743794785	3	25	UNKNOWN	7.57142857142857
1.14.18.1	dopamine	Pholiota nameko	1590	24	28	4	-0.252350691988642	0.267559512183041	0.833521743794785	3	NA	UNKNOWN	7.57142857142857
1.14.18.1	dopamine	Streptomyces antibioticus	210	24	28	4	-0.252350691988642	0.267559512183041	0.833521743794785	3	10	UNKNOWN	7.57142857142857
1.14.18.1	gly-gly-l-tyr	Agaricus bisporus	3	24	25	1	-0.380211241711609	NA	1	2	25	UNKNOWN	2.4
1.14.18.1	gly-gly-l-tyr	Trichoderma reesei	7.2	24	25	1	-0.380211241711609	NA	1	2	25	UNKNOWN	2.4
1.14.18.1	gly-l-tyr-gly	Agaricus bisporus	3.1	24	25	1	-0.131887596563629	NA	1	2	25	UNKNOWN	1.35483870967742
1.14.18.1	gly-l-tyr-gly	Trichoderma reesei	4.2	24	25	1	-0.131887596563629	NA	1	2	25	UNKNOWN	1.35483870967742
1.14.18.1	l-dopa	Agaricus bisporus	1810	24	30	6	-0.268169225418628	0.0318217085478746	0.723485497489847	6	25	UNKNOWN	30.2627413738525
1.14.18.1	l-dopa	Bacillus megaterium	15.795	24	30	6	-0.268169225418628	0.0318217085478746	0.723485497489847	6	NA	UNKNOWN	30.2627413738525
1.14.18.1	l-dopa	Neurospora crassa	317	24	30	6	-0.268169225418628	0.0318217085478746	0.723485497489847	6	NA	UNKNOWN	30.2627413738525
1.14.18.1	l-dopa	Pholiota nameko	478	24	30	6	-0.268169225418628	0.0318217085478746	0.723485497489847	6	NA	UNKNOWN	30.2627413738525
1.14.18.1	l-dopa	Streptomyces antibioticus	107.4	24	30	6	-0.268169225418628	0.0318217085478746	0.723485497489847	6	25	UNKNOWN	30.2627413738525
1.14.18.1	l-dopa	Trametes sanguinea	84.85	24	30	6	-0.268169225418628	0.0318217085478746	0.723485497489847	6	NA	UNKNOWN	30.2627413738525
1.14.18.1	l-tyr	Agaricus bisporus	7.9	25	26	1	-0.0896652267978434	0.959053486991108	0.0041311849876724	3	NA	UNKNOWN	4.00855745721271
1.14.18.1	l-tyr	Neurospora crassa	320	25	26	1	-0.0896652267978434	0.959053486991108	0.0041311849876724	3	NA	UNKNOWN	4.00855745721271
1.14.18.1	l-tyr	Trametes sanguinea	40.9	25	26	1	-0.0896652267978434	0.959053486991108	0.0041311849876724	3	NA	UNKNOWN	4.00855745721271
1.14.18.1	l-tyr-gly-gly	Agaricus bisporus	4	24	25	1	0.0969100130080569	NA	1	2	25	UNKNOWN	0.8
1.14.18.1	l-tyr-gly-gly	Trichoderma reesei	3.2	24	25	1	0.0969100130080569	NA	1	2	25	UNKNOWN	0.8
1.14.18.1	l-tyrosine	Agaricus bisporus	5.835	25	30	5	-0.0964253013869313	0.431781604766038	0.214784340733115	5	25	UNKNOWN	2.334
1.14.18.1	l-tyrosine	Bacillus megaterium	2.5	25	30	5	-0.0964253013869313	0.431781604766038	0.214784340733115	5	28	0	2.334
1.14.18.1	l-tyrosine	Ralstonia solanacearum	1.42	25	30	5	-0.0964253013869313	0.431781604766038	0.214784340733115	5	30	0	2.334
1.14.18.1	l-tyrosine	Streptomyces antibioticus	7.9	25	30	5	-0.0964253013869313	0.431781604766038	0.214784340733115	5	37	UNKNOWN	2.334
1.14.18.1	l-tyrosine	Streptomyces glaucescens	13.2	25	30	5	-0.0964253013869313	0.431781604766038	0.214784340733115	5	NA	UNKNOWN	2.334
1.14.18.1	l-tyrosine methyl ester	Agaricus bisporus	3.4	25	28	3	0.613196315076493	NA	1	2	NA	UNKNOWN	0.014468085106383
1.14.18.1	l-tyrosine methyl ester	Streptomyces glaucescens	235	25	28	3	0.613196315076493	NA	1	2	NA	UNKNOWN	0.014468085106383
1.14.18.1	tyramine	Agaricus bisporus	20.75	25	28	3	-0.297112440707014	0.452870974043532	0.573759918040889	3	25	UNKNOWN	12.2128378378378
1.14.18.1	tyramine	Neurospora crassa	160	25	28	3	-0.297112440707014	0.452870974043532	0.573759918040889	3	NA	UNKNOWN	12.2128378378378
1.14.18.1	tyramine	Streptomyces antibioticus	7.4	25	28	3	-0.297112440707014	0.452870974043532	0.573759918040889	3	10	UNKNOWN	12.2128378378378
1.14.19.59	l-tryptophan	Streptomyces albogriseolus	0.047	27	28	1	0.413221228563587	NA	1	2	30	UNKNOWN	0.386170212765957
1.14.19.59	l-tryptophan	Streptomyces toxytricini	0.01815	27	28	1	0.413221228563587	NA	1	2	NA	0	0.386170212765957
1.14.20.1	penicillin g	Acremonium chrysogenum	0.073	24	28	4	-0.0410882139461091	NA	1	2	NA	0	1.46
1.14.20.1	penicillin g	Streptomyces clavuligerus	0.05	24	28	4	-0.0410882139461091	NA	1	2	NA	0	1.46
1.14.20.9	2-oxoglutarate	Erwinia amylovora	0.22	26	34	8	0.127413144399423	NA	1	2	25	UNKNOWN	0.0956521739130435
1.14.20.9	2-oxoglutarate	Pseudomonas aeruginosa	2.3	26	34	8	0.127413144399423	NA	1	2	25	UNKNOWN	0.0956521739130435
1.16.1.1	hg2+	Escherichia coli	10.465	33	36	3	0.0186932184222901	0.975845539826336	0.0014388847707006	3	NA	0	1.69135212613473
1.16.1.1	hg2+	Lysinibacillus sphaericus	17.7	33	36	3	0.0186932184222901	0.975845539826336	0.0014388847707006	3	25	UNKNOWN	1.69135212613473
1.16.1.1	hg2+	Pseudomonas aeruginosa	0.7	33	36	3	0.0186932184222901	0.975845539826336	0.0014388847707006	3	6	UNKNOWN	1.69135212613473
1.16.3.1	cu+	Escherichia coli	15.8	28	36	8	0.193314945214482	0.303870375508674	0.788952545595978	3	23	0	0.0460443037974684
1.16.3.1	cu+	Rhodococcus erythropolis	0.155	28	36	8	0.193314945214482	0.303870375508674	0.788952545595978	3	30	0	0.0460443037974684
1.16.3.1	cu+	Saccharomyces cerevisiae	1.3	28	36	8	0.193314945214482	0.303870375508674	0.788952545595978	3	NA	UNKNOWN	0.0460443037974684
1.16.3.1	fe2+	Candida albicans	1.06	26	36	10	0.0629332397968752	0.177640060884415	0.924138643274523	3	NA	0	0.271099744245524
1.16.3.1	fe2+	Escherichia coli	3.91	26	36	10	0.0629332397968752	0.177640060884415	0.924138643274523	3	23	0	0.271099744245524
1.16.3.1	fe2+	Saccharomyces cerevisiae	0.92	26	36	10	0.0629332397968752	0.177640060884415	0.924138643274523	3	NA	0	0.271099744245524
1.17.1.10	nad+	Burkholderia stabilis	1.66	20	30	10	-0.0541067725115677	NA	1	2	30	0	3.47590361445783
1.17.1.10	nad+	Granulicella mallensis	5.77	20	30	10	-0.0541067725115677	NA	1	2	30	UNKNOWN	3.47590361445783
1.17.1.10	nadp+	Burkholderia stabilis	4.75	20	30	10	0.00789984236993542	NA	1	2	30	0	0.833684210526316
1.17.1.10	nadp+	Granulicella mallensis	3.96	20	30	10	0.00789984236993542	NA	1	2	30	UNKNOWN	0.833684210526316
1.17.1.4	xanthine	Acinetobacter baumannii	25	28	37	9	-0.171888958390021	0.0228885283469869	0.954746828035917	4	NA	UNKNOWN	34.1
1.17.1.4	xanthine	Delftia acidovorans	86	28	37	9	-0.171888958390021	0.0228885283469869	0.954746828035917	4	25	UNKNOWN	34.1
1.17.1.4	xanthine	Rhodobacter capsulatus	85.25	28	37	9	-0.171888958390021	0.0228885283469869	0.954746828035917	4	25	0	34.1
1.17.1.4	xanthine	Veillonella atypica	2.5	28	37	9	-0.171888958390021	0.0228885283469869	0.954746828035917	4	NA	UNKNOWN	34.1
1.17.1.8	nadh	Staphylococcus aureus	20.5	37	75	38	-0.048608297420019	NA	1	2	30	0	70.3259005145798
1.17.1.8	nadh	Thermotoga maritima	0.2915	37	75	38	-0.048608297420019	NA	1	2	30	UNKNOWN	70.3259005145798
1.17.1.9	co2	Desulfovibrio desulfuricans	46.6	28	31	3	0.497431552544774	NA	1	2	22	UNKNOWN	0.0321888412017167
1.17.1.9	co2	Rhodobacter capsulatus	1.5	28	31	3	0.497431552544774	NA	1	2	30	UNKNOWN	0.0321888412017167
1.17.1.9	formate	Chaetomium thermophilum	1.4245	24	44	20	-0.0393109568586971	0.71491152256458	0.0812754399664457	4	25	UNKNOWN	1.62864162864163
1.17.1.9	formate	Desulfovibrio desulfuricans	543	24	44	20	-0.0393109568586971	0.71491152256458	0.0812754399664457	4	22	UNKNOWN	1.62864162864163
1.17.1.9	formate	Ogataea angusta	2.32	24	44	20	-0.0393109568586971	0.71491152256458	0.0812754399664457	4	30	UNKNOWN	1.62864162864163
1.17.1.9	formate	Rhodobacter capsulatus	35.95	24	44	20	-0.0393109568586971	0.71491152256458	0.0812754399664457	4	30	UNKNOWN	1.62864162864163
1.17.1.9	nad+	Chaetomium thermophilum	0.65	28	44	16	-0.0625000000000001	NA	1	2	25	UNKNOWN	10
1.17.1.9	nad+	Saccharomyces cerevisiae	6.5	28	44	16	-0.0625000000000001	NA	1	2	30	0	10
1.18.1.2	2,6-dichlorophenolindophenol	Chlamydomonas reinhardtii	36	23	37	14	-0.0134961842672334	NA	1	2	30	0	1.5450643776824
1.18.1.2	2,6-dichlorophenolindophenol	Mycobacterium tuberculosis	23.3	23	37	14	-0.0134961842672334	NA	1	2	25	UNKNOWN	1.5450643776824
1.18.1.2	nadh	Bacillus subtilis	0.4	27	30	3	-0.356579897415033	0.433217994198757	0.604133053776513	3	24	UNKNOWN	8
1.18.1.2	nadh	Pseudomonas putida	9.59	27	30	3	-0.356579897415033	0.433217994198757	0.604133053776513	3	NA	UNKNOWN	8
1.18.1.2	nadh	Xanthomonas axonopodis	3.2	27	30	3	-0.356579897415033	0.433217994198757	0.604133053776513	3	NA	UNKNOWN	8
1.18.1.2	nadph	Bacillus subtilis	482.7	27	46	19	0.0255475138130322	0.506042468411755	0.065561945718173	9	24	UNKNOWN	0.572300469483568
1.18.1.2	nadph	Chlorobaculum tepidum	213	27	46	19	0.0255475138130322	0.506042468411755	0.065561945718173	9	25	UNKNOWN	0.572300469483568
1.18.1.2	nadph	Escherichia coli	38.2	27	46	19	0.0255475138130322	0.506042468411755	0.065561945718173	9	NA	UNKNOWN	0.572300469483568
1.18.1.2	nadph	Leptospira interrogans	258	27	46	19	0.0255475138130322	0.506042468411755	0.065561945718173	9	30	UNKNOWN	0.572300469483568
1.18.1.2	nadph	Plasmodium falciparum	55	27	46	19	0.0255475138130322	0.506042468411755	0.065561945718173	9	NA	UNKNOWN	0.572300469483568
1.18.1.2	nadph	Pseudomonas putida	8.91	27	46	19	0.0255475138130322	0.506042468411755	0.065561945718173	9	NA	UNKNOWN	0.572300469483568
1.18.1.2	nadph	Rhodobacter capsulatus	20	27	46	19	0.0255475138130322	0.506042468411755	0.065561945718173	9	NA	UNKNOWN	0.572300469483568
1.18.1.2	nadph	Toxoplasma gondii	505	27	46	19	0.0255475138130322	0.506042468411755	0.065561945718173	9	NA	0	0.572300469483568
1.18.1.2	nadph	Xanthomonas axonopodis	121.9	27	46	19	0.0255475138130322	0.506042468411755	0.065561945718173	9	NA	UNKNOWN	0.572300469483568
1.18.1.2	reduced ferredoxin	Azotobacter vinelandii	1	23	36	13	-0.0965179965786394	0.634021092762089	0.133940560543055	4	NA	UNKNOWN	880
1.18.1.2	reduced ferredoxin	Chlamydomonas reinhardtii	132	23	36	13	-0.0965179965786394	0.634021092762089	0.133940560543055	4	30	0	880
1.18.1.2	reduced ferredoxin	Escherichia coli	0.15	23	36	13	-0.0965179965786394	0.634021092762089	0.133940560543055	4	NA	UNKNOWN	880
1.18.1.2	reduced ferredoxin	Toxoplasma gondii	260	23	36	13	-0.0965179965786394	0.634021092762089	0.133940560543055	4	25	0	880
1.18.1.2	reduced flavodoxin	Escherichia coli	0.004	28	36	8	-0.224485002168009	NA	1	2	NA	UNKNOWN	62.5
1.18.1.2	reduced flavodoxin	Rhodobacter capsulatus	0.25	28	36	8	-0.224485002168009	NA	1	2	NA	UNKNOWN	62.5
1.19.1.1	nadph	Escherichia coli	5.65	28	36	8	-0.0686226934805679	NA	1	2	30	0	3.53982300884956
1.19.1.1	nadph	Rhodobacter capsulatus	20	28	36	8	-0.0686226934805679	NA	1	2	NA	UNKNOWN	3.53982300884956
1.2.1.10	acetaldehyde	Escherichia coli	15.7	30	36	6	-0.00660479908305253	NA	1	2	25	UNKNOWN	1.09554140127389
1.2.1.10	acetaldehyde	Paraburkholderia xenovorans	17.2	30	36	6	-0.00660479908305253	NA	1	2	25	0	1.09554140127389
1.2.1.11	l-aspartate 4-semialdehyde	Candida albicans	0.12	26	37	11	0.328738924725079	0.117257428082194	0.966456856291328	3	NA	UNKNOWN	0.000363636363636364
1.2.1.11	l-aspartate 4-semialdehyde	Haemophilus influenzae	330	26	37	11	0.328738924725079	0.117257428082194	0.966456856291328	3	NA	UNKNOWN	0.000363636363636364
1.2.1.11	l-aspartate 4-semialdehyde	Pseudomonas aeruginosa	160	26	37	11	0.328738924725079	0.117257428082194	0.966456856291328	3	NA	UNKNOWN	0.000363636363636364
1.2.1.11	nadp+	Escherichia coli	258	36	37	1	-0.687908890902314	0.70498476300127	0.199809027510855	3	30	0	1.52441726491181
1.2.1.11	nadp+	Haemophilus influenzae	330	36	37	1	-0.687908890902314	0.70498476300127	0.199809027510855	3	30	0	1.52441726491181
1.2.1.11	nadp+	Mycobacterium tuberculosis	8.49	36	37	1	-0.687908890902314	0.70498476300127	0.199809027510855	3	30	UNKNOWN	1.52441726491181
1.2.1.12	d-glyceraldehyde 3-phosphate	Geobacillus stearothermophilus	70	26	54	28	0.00546457130060926	0.785529447017033	0.0286477366276531	5	NA	UNKNOWN	1.68571428571429
1.2.1.12	d-glyceraldehyde 3-phosphate	Neisseria meningitidis	24.51	26	54	28	0.00546457130060926	0.785529447017033	0.0286477366276531	5	25	UNKNOWN	1.68571428571429
1.2.1.12	d-glyceraldehyde 3-phosphate	Saccharomyces cerevisiae	16.35	26	54	28	0.00546457130060926	0.785529447017033	0.0286477366276531	5	25	UNKNOWN	1.68571428571429
1.2.1.12	d-glyceraldehyde 3-phosphate	Staphylococcus aureus	70	26	54	28	0.00546457130060926	0.785529447017033	0.0286477366276531	5	25	0	1.68571428571429
1.2.1.12	d-glyceraldehyde 3-phosphate	Trypanosoma cruzi	118	26	54	28	0.00546457130060926	0.785529447017033	0.0286477366276531	5	25	UNKNOWN	1.68571428571429
1.2.1.12	nad+	Corynebacterium glutamicum	6.45	31	54	23	0.021112368666004	0.684068203083736	0.226713105884803	3	25	0	0.588076923076923
1.2.1.12	nad+	Geobacillus stearothermophilus	65	31	54	23	0.021112368666004	0.684068203083736	0.226713105884803	3	25	0	0.588076923076923
1.2.1.12	nad+	Lactococcus lactis	70	31	54	23	0.021112368666004	0.684068203083736	0.226713105884803	3	30	UNKNOWN	0.588076923076923
1.2.1.16	nad+	Bacillus subtilis	5.26	28	37	9	-0.110452710308216	0.264245446020195	0.296192775008914	6	NA	UNKNOWN	24.4827586206897
1.2.1.16	nad+	Escherichia coli	69	28	37	9	-0.110452710308216	0.264245446020195	0.296192775008914	6	70	UNKNOWN	24.4827586206897
1.2.1.16	nad+	Mycobacterium tuberculosis	2.7	28	37	9	-0.110452710308216	0.264245446020195	0.296192775008914	6	37	UNKNOWN	24.4827586206897
1.2.1.16	nad+	Pseudomonas putida	56.8	28	37	9	-0.110452710308216	0.264245446020195	0.296192775008914	6	NA	0	24.4827586206897
1.2.1.16	nad+	Pseudomonas stutzeri	176	28	37	9	-0.110452710308216	0.264245446020195	0.296192775008914	6	25	UNKNOWN	24.4827586206897
1.2.1.16	nad+	Streptococcus pyogenes	1.94	28	37	9	-0.110452710308216	0.264245446020195	0.296192775008914	6	30	UNKNOWN	24.4827586206897
1.2.1.16	nadp+	Bacillus subtilis	9.93	28	37	9	-0.103654619784289	0.114072898723688	0.619544855323257	5	NA	UNKNOWN	4.94117647058824
1.2.1.16	nadp+	Mycobacterium tuberculosis	1.3	28	37	9	-0.103654619784289	0.114072898723688	0.619544855323257	5	37	UNKNOWN	4.94117647058824
1.2.1.16	nadp+	Pseudomonas putida	21	28	37	9	-0.103654619784289	0.114072898723688	0.619544855323257	5	30	0	4.94117647058824
1.2.1.16	nadp+	Pseudomonas stutzeri	40	28	37	9	-0.103654619784289	0.114072898723688	0.619544855323257	5	25	UNKNOWN	4.94117647058824
1.2.1.16	nadp+	Streptococcus pyogenes	7.2	28	37	9	-0.103654619784289	0.114072898723688	0.619544855323257	5	30	UNKNOWN	4.94117647058824
1.2.1.16	succinate semialdehyde	Bacillus subtilis	6.425	30	37	7	-0.0413370274464921	NA	1	2	30	UNKNOWN	1.9469696969697
1.2.1.16	succinate semialdehyde	Mycobacterium tuberculosis	3.3	30	37	7	-0.0413370274464921	NA	1	2	37	UNKNOWN	1.9469696969697
1.2.1.26	alpha-ketoglutaric semialdehyde	Azospirillum brasilense	22.15	28	30	2	-0.739219438102291	0.3533905244433	0.722237119214112	3	NA	UNKNOWN	16.3587294996886
1.2.1.26	alpha-ketoglutaric semialdehyde	Bacillus subtilis	1.935	28	30	2	-0.739219438102291	0.3533905244433	0.722237119214112	3	NA	UNKNOWN	16.3587294996886
1.2.1.26	alpha-ketoglutaric semialdehyde	Pseudomonas putida	197	28	30	2	-0.739219438102291	0.3533905244433	0.722237119214112	3	NA	UNKNOWN	16.3587294996886
1.2.1.26	nad+	Acinetobacter baylyi	57	30	31	1	1.04614481927944	0.603317007678762	0.340544650397518	3	NA	UNKNOWN	0.317894736842105
1.2.1.26	nad+	Azospirillum brasilense	35.5	30	31	1	1.04614481927944	0.603317007678762	0.340544650397518	3	NA	UNKNOWN	0.317894736842105
1.2.1.26	nad+	Bacillus subtilis	0.74	30	31	1	1.04614481927944	0.603317007678762	0.340544650397518	3	NA	UNKNOWN	0.317894736842105
1.2.1.26	nadp+	Acinetobacter baylyi	55	30	31	1	1.21935072586979	0.385629332561973	0.675812340801471	3	NA	UNKNOWN	0.102545454545455
1.2.1.26	nadp+	Azospirillum brasilense	10.2	30	31	1	1.21935072586979	0.385629332561973	0.675812340801471	3	NA	UNKNOWN	0.102545454545455
1.2.1.26	nadp+	Bacillus subtilis	1.08	30	31	1	1.21935072586979	0.385629332561973	0.675812340801471	3	NA	UNKNOWN	0.102545454545455
1.2.1.28	2-hydroxybenzaldehyde	Acinetobacter calcoaceticus	41	28	33	5	0.0188539833683696	NA	1	2	NA	UNKNOWN	0.804878048780488
1.2.1.28	2-hydroxybenzaldehyde	Pseudomonas putida	33	28	33	5	0.0188539833683696	NA	1	2	NA	UNKNOWN	0.804878048780488
1.2.1.28	3-hydroxybenzaldehyde	Acinetobacter calcoaceticus	29	28	33	5	0.01643735123747	NA	1	2	NA	UNKNOWN	0.827586206896552
1.2.1.28	3-hydroxybenzaldehyde	Pseudomonas putida	24	28	33	5	0.01643735123747	NA	1	2	NA	UNKNOWN	0.827586206896552
1.2.1.28	3-methoxybenzaldehyde	Acinetobacter calcoaceticus	33	28	33	5	-0.285685866163988	NA	1	2	NA	UNKNOWN	26.8181818181818
1.2.1.28	3-methoxybenzaldehyde	Pseudomonas putida	885	28	33	5	-0.285685866163988	NA	1	2	NA	UNKNOWN	26.8181818181818
1.2.1.28	4-methoxybenzaldehyde	Acinetobacter calcoaceticus	49	28	33	5	-0.0628250587508259	NA	1	2	NA	UNKNOWN	2.06122448979592
1.2.1.28	4-methoxybenzaldehyde	Pseudomonas putida	101	28	33	5	-0.0628250587508259	NA	1	2	NA	UNKNOWN	2.06122448979592
1.2.1.28	benzaldehyde	Acinetobacter calcoaceticus	72	28	33	5	0.142240892150606	NA	1	2	NA	UNKNOWN	0.194444444444444
1.2.1.28	benzaldehyde	Pseudomonas putida	14	28	33	5	0.142240892150606	NA	1	2	NA	UNKNOWN	0.194444444444444
1.2.1.3	benzaldehyde	Escherichia coli	17.37	28	36	8	0.285845670149593	NA	1	2	37	UNKNOWN	0.00516695451928613
1.2.1.3	benzaldehyde	Pseudomonas putida	0.08975	28	36	8	0.285845670149593	NA	1	2	25	UNKNOWN	0.00516695451928613
1.2.1.4	glyceraldehyde	Paenarthrobacter nicotinovorans	1.35	30	90	60	-0.000852542040789688	NA	1	2	28	UNKNOWN	1.125
1.2.1.4	glyceraldehyde	Pyrobaculum ferrireducens	1.2	30	90	60	-0.000852542040789688	NA	1	2	60	UNKNOWN	1.125
1.2.1.4	propionaldehyde	Paenarthrobacter nicotinovorans	1.2	30	90	60	0.00638694586418885	NA	1	2	28	UNKNOWN	0.413793103448276
1.2.1.4	propionaldehyde	Pyrobaculum ferrireducens	2.9	30	90	60	0.00638694586418885	NA	1	2	60	UNKNOWN	0.413793103448276
1.2.1.5	acetaldehyde	Bacillus cereus	0.183	30	32	2	0.591187054889659	NA	1	2	37	UNKNOWN	0.0657091561938959
1.2.1.5	acetaldehyde	Bacillus licheniformis	2.785	30	32	2	0.591187054889659	NA	1	2	37	UNKNOWN	0.0657091561938959
1.2.1.8	nad+	Pseudomonas aeruginosa	261	34	37	3	-0.541884010749821	NA	1	2	30	UNKNOWN	42.2330097087379
1.2.1.8	nad+	Staphylococcus aureus	6.18	34	37	3	-0.541884010749821	NA	1	2	30	UNKNOWN	42.2330097087379
1.2.1.8	nadp+	Pseudomonas aeruginosa	276	34	37	3	-0.897573685019671	NA	1	2	30	UNKNOWN	492.857142857143
1.2.1.8	nadp+	Staphylococcus aureus	0.56	34	37	3	-0.897573685019671	NA	1	2	30	UNKNOWN	492.857142857143
1.2.1.87	acetaldehyde	Paraburkholderia xenovorans	17.2	30	71	41	-0.0168648878672506	NA	1	2	25	UNKNOWN	4.91428571428571
1.2.1.87	acetaldehyde	Thermus thermophilus	3.5	30	71	41	-0.0168648878672506	NA	1	2	25	UNKNOWN	4.91428571428571
1.2.1.87	acetyl-coa	Klebsiella pneumoniae	4.63	34	36	2	0.25248703375163	0.192158202827452	0.911625279121889	3	30	UNKNOWN	0.312626603646185
1.2.1.87	acetyl-coa	Listeria monocytogenes	11.33	34	36	2	0.25248703375163	0.192158202827452	0.911625279121889	3	30	UNKNOWN	0.312626603646185
1.2.1.87	acetyl-coa	Salmonella enterica	14.81	34	36	2	0.25248703375163	0.192158202827452	0.911625279121889	3	30	UNKNOWN	0.312626603646185
1.2.1.87	butanoyl-coa	Klebsiella pneumoniae	7.02	34	36	2	0.279077252814443	0.0611781429609349	0.990793489916256	3	30	UNKNOWN	0.276595744680851
1.2.1.87	butanoyl-coa	Listeria monocytogenes	11.99	34	36	2	0.279077252814443	0.0611781429609349	0.990793489916256	3	30	UNKNOWN	0.276595744680851
1.2.1.87	butanoyl-coa	Salmonella enterica	25.38	34	36	2	0.279077252814443	0.0611781429609349	0.990793489916256	3	30	UNKNOWN	0.276595744680851
1.2.1.87	propionaldehyde	Paraburkholderia xenovorans	16.3	30	71	41	-0.0159971976496749	NA	1	2	25	UNKNOWN	4.52777777777778
1.2.1.87	propionaldehyde	Thermus thermophilus	3.6	30	71	41	-0.0159971976496749	NA	1	2	25	UNKNOWN	4.52777777777778
1.2.1.88	1-pyrroline-5-carboxylate	Escherichia coli	5.16	28	71	43	-0.013683908351547	0.509741635755079	0.240353263712106	4	21	UNKNOWN	8.28125
1.2.1.88	1-pyrroline-5-carboxylate	Saccharomyces cerevisiae	1.5	28	71	43	-0.013683908351547	0.509741635755079	0.240353263712106	4	20	UNKNOWN	8.28125
1.2.1.88	1-pyrroline-5-carboxylate	Streptomyces coelicolor	25	28	71	43	-0.013683908351547	0.509741635755079	0.240353263712106	4	NA	UNKNOWN	8.28125
1.2.1.88	1-pyrroline-5-carboxylate	Thermus thermophilus	1.6	28	71	43	-0.013683908351547	0.509741635755079	0.240353263712106	4	50	UNKNOWN	8.28125
1.2.1.88	nad+	Thermus thermophilus	1.6	26	71	45	-0.0149098062385728	NA	1	2	50	UNKNOWN	4.6875
1.2.1.88	nad+	Trypanosoma cruzi	7.5	26	71	45	-0.0149098062385728	NA	1	2	28	UNKNOWN	4.6875
1.2.1.88	nadp+	Thermus thermophilus	0.42	26	71	45	-0.0101318212366605	NA	1	2	50	UNKNOWN	2.85714285714286
1.2.1.88	nadp+	Trypanosoma cruzi	1.2	26	71	45	-0.0101318212366605	NA	1	2	28	UNKNOWN	2.85714285714286
1.2.1.89	d-glyceraldehyde	Picrophilus torridus	10	55	57	2	0.207486673985409	NA	1	2	58	UNKNOWN	0.384615384615385
1.2.1.89	d-glyceraldehyde	Thermoplasma acidophilum	26	55	57	2	0.207486673985409	NA	1	2	58	UNKNOWN	0.384615384615385
1.2.1.89	d-glycerate	Picrophilus torridus	12	55	57	2	0.110924374808179	NA	1	2	58	UNKNOWN	0.6
1.2.1.89	d-glycerate	Thermoplasma acidophilum	20	55	57	2	0.110924374808179	NA	1	2	58	UNKNOWN	0.6
1.2.1.89	glycolaldehyde	Picrophilus torridus	20	55	57	2	0.133585864201507	NA	1	2	58	UNKNOWN	0.540540540540541
1.2.1.89	glycolaldehyde	Thermoplasma acidophilum	37	55	57	2	0.133585864201507	NA	1	2	58	UNKNOWN	0.540540540540541
1.2.1.89	nadp+	Picrophilus torridus	10	55	57	2	0.198970004336019	NA	1	2	58	UNKNOWN	0.4
1.2.1.89	nadp+	Thermoplasma acidophilum	25	55	57	2	0.198970004336019	NA	1	2	58	UNKNOWN	0.4
1.2.1.95	l-2-aminoadipate	Penicillium chrysogenum	1.1	24	28	4	0.394685842453882	NA	1	2	30	UNKNOWN	0.026378896882494
1.2.1.95	l-2-aminoadipate	Saccharomyces cerevisiae	41.7	24	28	4	0.394685842453882	NA	1	2	37	UNKNOWN	0.026378896882494
1.2.1.99	3-hydroxypropionaldehyde	Escherichia coli	16.725	34	36	2	-0.0367591745493434	NA	1	2	37	UNKNOWN	1.18445440956652
1.2.1.99	3-hydroxypropionaldehyde	Klebsiella pneumoniae	19.81	34	36	2	-0.0367591745493434	NA	1	2	45	UNKNOWN	1.18445440956652
1.2.1.99	butyraldehyde	Escherichia coli	26.95	34	36	2	-0.0257284034639773	NA	1	2	37	UNKNOWN	1.12578849721707
1.2.1.99	butyraldehyde	Klebsiella pneumoniae	30.34	34	36	2	-0.0257284034639773	NA	1	2	45	UNKNOWN	1.12578849721707
1.2.1.99	isovaleraldehyde	Escherichia coli	27.31	34	36	2	0.015146377588059	NA	1	2	37	UNKNOWN	0.932625411937019
1.2.1.99	isovaleraldehyde	Klebsiella pneumoniae	25.47	34	36	2	0.015146377588059	NA	1	2	45	UNKNOWN	0.932625411937019
1.2.1.99	valeraldehyde	Escherichia coli	26.24	34	36	2	-0.0262372883428386	NA	1	2	37	UNKNOWN	1.12842987804878
1.2.1.99	valeraldehyde	Klebsiella pneumoniae	29.61	34	36	2	-0.0262372883428386	NA	1	2	45	UNKNOWN	1.12842987804878
1.2.4.1	pyruvate	Escherichia coli	37.9	28	54	26	-0.0370787502874528	0.752464917932047	0.0612736168543881	4	30	0	0.104166666666667
1.2.4.1	pyruvate	Geobacillus stearothermophilus	0.48	28	54	26	-0.0370787502874528	0.752464917932047	0.0612736168543881	4	25	0	0.104166666666667
1.2.4.1	pyruvate	Pseudomonas putida	0.05	28	54	26	-0.0370787502874528	0.752464917932047	0.0612736168543881	4	30	UNKNOWN	0.104166666666667
1.2.4.1	pyruvate	Zymomonas mobilis	486	28	54	26	-0.0370787502874528	0.752464917932047	0.0612736168543881	4	30	0	0.104166666666667
1.2.7.4	co	Carboxydothermus hydrogenoformans	8700	58	65	7	0.385211600561761	NA	1	2	20	UNKNOWN	0.00201149425287356
1.2.7.4	co	Moorella thermoacetica	17.5	58	65	7	0.385211600561761	NA	1	2	NA	UNKNOWN	0.00201149425287356
1.2.99.7	benzaldehyde	Desulfovibrio alaskensis	0.96	32	34	2	0.0865324022127464	NA	1	2	NA	UNKNOWN	0.671328671328671
1.2.99.7	benzaldehyde	Desulfovibrio gigas	1.43	32	34	2	0.0865324022127464	NA	1	2	37	UNKNOWN	0.671328671328671
1.20.1.1	phosphonate	Cupriavidus metallidurans	6.83	20	30	10	0.0143446063610876	0.703284998332676	0.201948519422329	3	25	UNKNOWN	0.669990029910269
1.20.1.1	phosphonate	Nostoc punctiforme	3.36	20	30	10	0.0143446063610876	0.703284998332676	0.201948519422329	3	25	UNKNOWN	0.669990029910269
1.20.1.1	phosphonate	Pseudomonas stutzeri	3.2	20	30	10	0.0143446063610876	0.703284998332676	0.201948519422329	3	30	UNKNOWN	0.669990029910269
1.20.4.4	arsenate	Bacillus subtilis	1.6	30	71	41	0.000804450326678393	0.968254273710737	0.000621785118047821	5	NA	0	2.13333333333333
1.20.4.4	arsenate	Corynebacterium glutamicum	0.09	30	71	41	0.000804450326678393	0.968254273710737	0.000621785118047821	5	37	0	2.13333333333333
1.20.4.4	arsenate	Desulfovibrio alaskensis	2.65	30	71	41	0.000804450326678393	0.968254273710737	0.000621785118047821	5	37	UNKNOWN	2.13333333333333
1.20.4.4	arsenate	Staphylococcus aureus	0.58	30	71	41	0.000804450326678393	0.968254273710737	0.000621785118047821	5	NA	0	2.13333333333333
1.20.4.4	arsenate	Thermus thermophilus	0.75	30	71	41	0.000804450326678393	0.968254273710737	0.000621785118047821	5	60	UNKNOWN	2.13333333333333
1.3.1.12	nad+	Escherichia coli	0.45	36	37	1	2.05718933292728	0.392300163768526	0.665965081936261	3	NA	0	0.00247592847317744
1.3.1.12	nad+	Mycobacterium tuberculosis	356.1	36	37	1	2.05718933292728	0.392300163768526	0.665965081936261	3	NA	UNKNOWN	0.00247592847317744
1.3.1.12	nad+	Streptococcus mutans	7.4	36	37	1	2.05718933292728	0.392300163768526	0.665965081936261	3	37	UNKNOWN	0.00247592847317744
1.3.1.12	prephenate	Escherichia coli	67.725	25	37	12	0.163213363294451	0.081579793496114	0.57262199829221	6	NA	0	0.0882857142857143
1.3.1.12	prephenate	Haemophilus influenzae	35	25	37	12	0.163213363294451	0.081579793496114	0.57262199829221	6	30	UNKNOWN	0.0882857142857143
1.3.1.12	prephenate	Mycobacterium tuberculosis	170.4	25	37	12	0.163213363294451	0.081579793496114	0.57262199829221	6	NA	UNKNOWN	0.0882857142857143
1.3.1.12	prephenate	Pleurotus ostreatus	3.09	25	37	12	0.163213363294451	0.081579793496114	0.57262199829221	6	37	UNKNOWN	0.0882857142857143
1.3.1.12	prephenate	Saccharomyces cerevisiae	0.1	25	37	12	0.163213363294451	0.081579793496114	0.57262199829221	6	37	UNKNOWN	0.0882857142857143
1.3.1.12	prephenate	Streptococcus mutans	10.5	25	37	12	0.163213363294451	0.081579793496114	0.57262199829221	6	37	UNKNOWN	0.0882857142857143
1.3.1.32	maleylacetate	Pimelobacter simplex	114	27	30	3	-0.659241201762948	NA	1	2	NA	UNKNOWN	95
1.3.1.32	maleylacetate	Sphingobium chlorophenolicum	1.2	27	30	3	-0.659241201762948	NA	1	2	NA	UNKNOWN	95
1.3.1.33	nadph	Chlamydomonas reinhardtii	0.043	20	50	30	0.0191513887686175	0.142251348930216	0.735732748412034	4	NA	UNKNOWN	0.212121212121212
1.3.1.33	nadph	Cyanidioschyzon merolae	0.042	20	50	30	0.0191513887686175	0.142251348930216	0.735732748412034	4	NA	UNKNOWN	0.212121212121212
1.3.1.33	nadph	Nostoc punctiforme	0.035	20	50	30	0.0191513887686175	0.142251348930216	0.735732748412034	4	NA	UNKNOWN	0.212121212121212
1.3.1.33	nadph	Thermosynechococcus elongatus	0.165	20	50	30	0.0191513887686175	0.142251348930216	0.735732748412034	4	25	0	0.212121212121212
1.3.1.84	acrylyl-coa	Escherichia coli	45	28	36	8	-0.0288320161403768	0.178912375022068	0.923076923076922	3	30	UNKNOWN	1.77777777777778
1.3.1.84	acrylyl-coa	Rhodobacter sphaeroides	80	28	36	8	-0.0288320161403768	0.178912375022068	0.923076923076922	3	30	UNKNOWN	1.77777777777778
1.3.1.84	acrylyl-coa	Ruegeria pomeroyi	60	28	36	8	-0.0288320161403768	0.178912375022068	0.923076923076922	3	30	UNKNOWN	1.77777777777778
1.3.1.9	crotonyl-coa	Burkholderia pseudomallei	3.6	26	37	11	-0.0614419280527605	0.0404622653763817	0.920712664166625	4	25	UNKNOWN	4.54081632653061
1.3.1.9	crotonyl-coa	Escherichia coli	5.3	26	37	11	-0.0614419280527605	0.0404622653763817	0.920712664166625	4	30	UNKNOWN	4.54081632653061
1.3.1.9	crotonyl-coa	Plasmodium falciparum	6.2	26	37	11	-0.0614419280527605	0.0404622653763817	0.920712664166625	4	25	UNKNOWN	4.54081632653061
1.3.1.9	crotonyl-coa	Xanthomonas oryzae	22.25	26	37	11	-0.0614419280527605	0.0404622653763817	0.920712664166625	4	25	UNKNOWN	4.54081632653061
1.3.1.9	trans-2-decenoyl-coa	Burkholderia pseudomallei	5.6	33	37	4	0.00136572392537546	NA	1	2	25	UNKNOWN	0.9875
1.3.1.9	trans-2-decenoyl-coa	Yersinia pestis	5.53	33	37	4	0.00136572392537546	NA	1	2	30	0	0.9875
1.3.1.9	trans-2-dodecenoyl-coa	Burkholderia pseudomallei	8.4	33	37	4	-0.271685219045499	0.00503647556106621	0.989952414963945	4	25	UNKNOWN	11.9553952115448
1.3.1.9	trans-2-dodecenoyl-coa	Escherichia coli	11.9	33	37	4	-0.271685219045499	0.00503647556106621	0.989952414963945	4	25	UNKNOWN	11.9553952115448
1.3.1.9	trans-2-dodecenoyl-coa	Mycobacterium tuberculosis	6.845	33	37	4	-0.271685219045499	0.00503647556106621	0.989952414963945	4	25	0	11.9553952115448
1.3.1.9	trans-2-dodecenoyl-coa	Yersinia pestis	91.13	33	37	4	-0.271685219045499	0.00503647556106621	0.989952414963945	4	30	0	11.9553952115448
1.3.1.9	trans-2-octenoyl-coa	Burkholderia pseudomallei	28.3	33	37	4	0.505105667841327	NA	1	2	25	UNKNOWN	0.00954063604240283
1.3.1.9	trans-2-octenoyl-coa	Yersinia pestis	0.27	33	37	4	0.505105667841327	NA	1	2	30	0	0.00954063604240283
1.3.1.9	trans-but-2-enoyl-[acyl-carrier protein]	Plasmodium falciparum	1.62	28	37	9	0.118214200087457	0.526345735076002	0.458663449664623	3	25	UNKNOWN	0.0354919733537185
1.3.1.9	trans-but-2-enoyl-[acyl-carrier protein]	Rhodobacter sphaeroides	0.65	28	37	9	0.118214200087457	0.526345735076002	0.458663449664623	3	30	UNKNOWN	0.0354919733537185
1.3.1.9	trans-but-2-enoyl-[acyl-carrier protein]	Streptococcus pneumoniae	35.008	28	37	9	0.118214200087457	0.526345735076002	0.458663449664623	3	30	UNKNOWN	0.0354919733537185
1.3.3.4	protoporphyrinogen ix	Bacillus subtilis	0.00825	28	30	2	-0.970439273940676	NA	1	2	22	0	87.2727272727273
1.3.3.4	protoporphyrinogen ix	Myxococcus xanthus	0.72	28	30	2	-0.970439273940676	NA	1	2	37	0	87.2727272727273
1.3.3.4	protoporphyrinogen-ix	Bacillus subtilis	0.00317	28	34	6	0.146284800991722	0.710805556311727	0.192547621180688	3	NA	UNKNOWN	0.293898305084746
1.3.3.4	protoporphyrinogen-ix	Desulfovibrio gigas	0.295	28	34	6	0.146284800991722	0.710805556311727	0.192547621180688	3	NA	UNKNOWN	0.293898305084746
1.3.3.4	protoporphyrinogen-ix	Myxococcus xanthus	0.0867	28	34	6	0.146284800991722	0.710805556311727	0.192547621180688	3	NA	UNKNOWN	0.293898305084746
1.3.3.5	bilirubin	Aspergillus oryzae	3.93	25	30	5	0.24633645046508	NA	1	2	NA	UNKNOWN	0.0586567164179104
1.3.3.5	bilirubin	Bacillus pumilus	67	25	30	5	0.24633645046508	NA	1	2	37	UNKNOWN	0.0586567164179104
1.3.3.6	hexanoyl-coa	Glutamicibacter nicotianae	0.203	24	30	6	-0.271082854319672	NA	1	2	NA	UNKNOWN	42.3152709359606
1.3.3.6	hexanoyl-coa	Yarrowia lipolytica	8.59	24	30	6	-0.271082854319672	NA	1	2	NA	UNKNOWN	42.3152709359606
1.3.5.1	fumarate	Escherichia coli	1.7	36	68	32	0.0522020045737311	NA	1	2	30	UNKNOWN	0.021356783919598
1.3.5.1	fumarate	Rhodothermus marinus	79.6	36	68	32	0.0522020045737311	NA	1	2	65	UNKNOWN	0.021356783919598
1.3.5.1	succinate	Escherichia coli	85	27	36	9	-0.00153290607298935	0.985809038989762	0.000496811263939171	3	30	0	0.784705882352941
1.3.5.1	succinate	Paracoccus denitrificans	260	27	36	9	-0.00153290607298935	0.985809038989762	0.000496811263939171	3	NA	0	0.784705882352941
1.3.5.1	succinate	Rhodospirillum rubrum	66.7	27	36	9	-0.00153290607298935	0.985809038989762	0.000496811263939171	3	NA	UNKNOWN	0.784705882352941
1.3.5.2	decylubiquinone	Plasmodium falciparum	1.8	35	37	2	-0.843367773959505	NA	1	2	25	UNKNOWN	48.6111111111111
1.3.5.2	decylubiquinone	Toxoplasma gondii	87.5	35	37	2	-0.843367773959505	NA	1	2	25	0	48.6111111111111
1.3.5.2	dihydroorotate	Candida albicans	2.15	26	37	11	0.0787471479126197	NA	1	2	NA	UNKNOWN	0.136075949367089
1.3.5.2	dihydroorotate	Plasmodium falciparum	15.8	26	37	11	0.0787471479126197	NA	1	2	NA	0	0.136075949367089
1.3.5.2	s-dihydroorotate	Escherichia coli	19.7	36	37	1	-1.89652621748954	NA	1	2	4	UNKNOWN	78.8
1.3.5.2	s-dihydroorotate	Plasmodium falciparum	0.25	36	37	1	-1.89652621748954	NA	1	2	NA	UNKNOWN	78.8
1.3.5.4	fumarate	Escherichia coli	230	36	37	1	-0.478066400863972	NA	1	2	30	UNKNOWN	3.00653594771242
1.3.5.4	fumarate	Wolinella succinogenes	76.5	36	37	1	-0.478066400863972	NA	1	2	NA	UNKNOWN	3.00653594771242
1.3.5.4	succinate	Escherichia coli	15	36	68	32	0.0240006833144259	0.0626211298453459	0.9903554847981	3	30	UNKNOWN	0.1875
1.3.5.4	succinate	Rhodothermus marinus	80	36	68	32	0.0240006833144259	0.0626211298453459	0.9903554847981	3	NA	UNKNOWN	0.1875
1.3.5.4	succinate	Wolinella succinogenes	13	36	68	32	0.0240006833144259	0.0626211298453459	0.9903554847981	3	NA	UNKNOWN	0.1875
1.3.8.1	butyryl-coa	Megasphaera elsdenii	5	28	37	9	0.0929588755304574	NA	1	2	NA	0	0.14567
1.3.8.1	butyryl-coa	Pseudomonas putida	0.72835	28	37	9	0.0929588755304574	NA	1	2	NA	UNKNOWN	0.14567
1.3.98.1	s-dihydroorotate	Crithidia fasciculata	117.5	25	28	3	-0.236103343530054	NA	1	2	NA	UNKNOWN	5.10869565217391
1.3.98.1	s-dihydroorotate	Saccharomyces cerevisiae	23	25	28	3	-0.236103343530054	NA	1	2	NA	UNKNOWN	5.10869565217391
1.4.1.1	l-ala	Archaeoglobus fulgidus	6.1	37	81	44	-0.0298872888660636	NA	1	2	82	UNKNOWN	20.655737704918
1.4.1.1	l-ala	Mycobacterium tuberculosis	126	37	81	44	-0.0298872888660636	NA	1	2	25	0	20.655737704918
1.4.1.1	nadh	Archaeoglobus fulgidus	118	30	81	51	0.0181764037062546	NA	1	2	82	UNKNOWN	0.118305084745763
1.4.1.1	nadh	Bacillus subtilis	13.96	30	81	51	0.0181764037062546	NA	1	2	30	0	0.118305084745763
1.4.1.13	nadph	Azospirillum brasilense	24.55	30	95	65	-0.00514881792436903	NA	1	2	NA	UNKNOWN	2.16109154929577
1.4.1.13	nadph	Pyrococcus horikoshii	11.36	30	95	65	-0.00514881792436903	NA	1	2	37	UNKNOWN	2.16109154929577
1.4.1.2	2-oxoglutarate	Bacillus subtilis	343	30	90	60	-0.00272232648400213	0.851742261325723	0.0219803570768104	4	NA	0	5.27692307692308
1.4.1.2	2-oxoglutarate	Halobacterium salinarum	51	30	90	60	-0.00272232648400213	0.851742261325723	0.0219803570768104	4	40	UNKNOWN	5.27692307692308
1.4.1.2	2-oxoglutarate	Peptoniphilus asaccharolyticus	20.3	30	90	60	-0.00272232648400213	0.851742261325723	0.0219803570768104	4	25	UNKNOWN	5.27692307692308
1.4.1.2	2-oxoglutarate	Pyrobaculum calidifontis	65	30	90	60	-0.00272232648400213	0.851742261325723	0.0219803570768104	4	50	UNKNOWN	5.27692307692308
1.4.1.2	l-glutamate	Bacillus subtilis	18.1	30	90	60	-0.000861631156558555	0.521300567669125	0.466566112299525	3	NA	0	1.06470588235294
1.4.1.2	l-glutamate	Halobacterium salinarum	20.5	30	90	60	-0.000861631156558555	0.521300567669125	0.466566112299525	3	40	UNKNOWN	1.06470588235294
1.4.1.2	l-glutamate	Pyrobaculum calidifontis	17	30	90	60	-0.000861631156558555	0.521300567669125	0.466566112299525	3	50	UNKNOWN	1.06470588235294
1.4.1.2	nad+	Halobacterium salinarum	15.5	37	90	53	0.00305446342266548	0.728943771280342	0.170590409855164	3	40	UNKNOWN	0.767857142857143
1.4.1.2	nad+	Peptoniphilus asaccharolyticus	6	37	90	53	0.00305446342266548	0.728943771280342	0.170590409855164	3	25	UNKNOWN	0.767857142857143
1.4.1.2	nad+	Pyrobaculum calidifontis	14	37	90	53	0.00305446342266548	0.728943771280342	0.170590409855164	3	50	UNKNOWN	0.767857142857143
1.4.1.2	nadh	Halobacterium salinarum	43	37	90	53	0.00374669798471276	0.34333515764457	0.736272856948625	3	40	UNKNOWN	0.640948275862069
1.4.1.2	nadh	Peptoniphilus asaccharolyticus	31.35	37	90	53	0.00374669798471276	0.34333515764457	0.736272856948625	3	NA	0	0.640948275862069
1.4.1.2	nadh	Pyrobaculum calidifontis	58	37	90	53	0.00374669798471276	0.34333515764457	0.736272856948625	3	50	UNKNOWN	0.640948275862069
1.4.1.2	nh3	Halobacterium salinarum	84.5	37	90	53	-0.00308356066767461	NA	1	2	40	UNKNOWN	1.45689655172414
1.4.1.2	nh3	Pyrobaculum calidifontis	58	37	90	53	-0.00308356066767461	NA	1	2	50	UNKNOWN	1.45689655172414
1.4.1.20	l-norleucine	Lysinibacillus sphaericus	3.2	33	53	20	-0.0113198188683539	NA	1	2	25	UNKNOWN	1.68421052631579
1.4.1.20	l-norleucine	Thermoactinomyces intermedius	1.9	33	53	20	-0.0113198188683539	NA	1	2	NA	0	1.68421052631579
1.4.1.20	l-norvaline	Lysinibacillus sphaericus	1.4	33	53	20	-0.0187638012018047	NA	1	2	25	UNKNOWN	2.3728813559322
1.4.1.20	l-norvaline	Thermoactinomyces intermedius	0.59	33	53	20	-0.0187638012018047	NA	1	2	NA	0	2.3728813559322
1.4.1.20	l-phe	Bacillus badius	765	30	53	23	-0.0534977791903597	NA	1	2	25	UNKNOWN	17
1.4.1.20	l-phe	Thermoactinomyces intermedius	45	30	53	23	-0.0534977791903597	NA	1	2	NA	0	17
1.4.1.20	l-phenylalanine	Bacillus badius	39	30	33	3	0.121874432488849	0.413711616475989	0.63388749873644	3	NA	UNKNOWN	0.460634641515466
1.4.1.20	l-phenylalanine	Lysinibacillus sphaericus	62.555	30	33	3	0.121874432488849	0.413711616475989	0.63388749873644	3	NA	0	0.460634641515466
1.4.1.20	l-phenylalanine	Sporosarcina ureae	18.63	30	33	3	0.121874432488849	0.413711616475989	0.63388749873644	3	25	0	0.460634641515466
1.4.1.20	l-tyrosine	Bacillus badius	34	30	33	3	0.100343331887993	NA	1	2	NA	UNKNOWN	0.5
1.4.1.20	l-tyrosine	Lysinibacillus sphaericus	68	30	33	3	0.100343331887993	NA	1	2	25	UNKNOWN	0.5
1.4.1.20	phenylpyruvate	Lysinibacillus sphaericus	113	33	53	20	-0.00470185255811628	NA	1	2	25	UNKNOWN	1.24175824175824
1.4.1.20	phenylpyruvate	Thermoactinomyces intermedius	91	33	53	20	-0.00470185255811628	NA	1	2	NA	0	1.24175824175824
1.4.1.21	l-aspartate	Bradyrhizobium japonicum	7.3	26	75	49	-0.00951607462807298	0.63140900708192	0.135859320060337	4	28	UNKNOWN	2.57042253521127
1.4.1.21	l-aspartate	Pseudomonas aeruginosa	51.2	26	75	49	-0.00951607462807298	0.63140900708192	0.135859320060337	4	37	UNKNOWN	2.57042253521127
1.4.1.21	l-aspartate	Rhodopseudomonas palustris	2.86	26	75	49	-0.00951607462807298	0.63140900708192	0.135859320060337	4	28	UNKNOWN	2.57042253521127
1.4.1.21	l-aspartate	Thermotoga maritima	2.84	26	75	49	-0.00951607462807298	0.63140900708192	0.135859320060337	4	NA	UNKNOWN	2.57042253521127
1.4.1.21	nad+	Bradyrhizobium japonicum	3.3	26	75	49	-0.0127654807766908	0.629025501309046	0.137622078679005	4	28	UNKNOWN	2.75
1.4.1.21	nad+	Pseudomonas aeruginosa	62.9	26	75	49	-0.0127654807766908	0.629025501309046	0.137622078679005	4	37	UNKNOWN	2.75
1.4.1.21	nad+	Rhodopseudomonas palustris	1.59	26	75	49	-0.0127654807766908	0.629025501309046	0.137622078679005	4	28	UNKNOWN	2.75
1.4.1.21	nad+	Thermotoga maritima	1.2	26	75	49	-0.0127654807766908	0.629025501309046	0.137622078679005	4	NA	UNKNOWN	2.75
1.4.1.21	nadh	Bradyrhizobium japonicum	26.2	26	34	8	0.0713585472357285	0.663281597843153	0.254618926424203	3	28	UNKNOWN	0.371631205673759
1.4.1.21	nadh	Pseudomonas aeruginosa	70.5	26	34	8	0.0713585472357285	0.663281597843153	0.254618926424203	3	37	UNKNOWN	0.371631205673759
1.4.1.21	nadh	Rhodopseudomonas palustris	5.2	26	34	8	0.0713585472357285	0.663281597843153	0.254618926424203	3	28	UNKNOWN	0.371631205673759
1.4.1.21	nadp+	Bradyrhizobium japonicum	6.2	26	75	49	0.000768266839993361	0.967484546357936	0.0010572547255492	4	28	UNKNOWN	0.861111111111111
1.4.1.21	nadp+	Pseudomonas aeruginosa	46.1	26	75	49	0.000768266839993361	0.967484546357936	0.0010572547255492	4	37	UNKNOWN	0.861111111111111
1.4.1.21	nadp+	Rhodopseudomonas palustris	2.33	26	75	49	0.000768266839993361	0.967484546357936	0.0010572547255492	4	28	UNKNOWN	0.861111111111111
1.4.1.21	nadp+	Thermotoga maritima	7.2	26	75	49	0.000768266839993361	0.967484546357936	0.0010572547255492	4	NA	UNKNOWN	0.861111111111111
1.4.1.21	nadph	Bradyrhizobium japonicum	41	26	34	8	0.0454707873660345	0.600454727530967	0.344812335933077	3	28	UNKNOWN	0.511221945137157
1.4.1.21	nadph	Pseudomonas aeruginosa	80.2	26	34	8	0.0454707873660345	0.600454727530967	0.344812335933077	3	37	UNKNOWN	0.511221945137157
1.4.1.21	nadph	Rhodopseudomonas palustris	19	26	34	8	0.0454707873660345	0.600454727530967	0.344812335933077	3	28	UNKNOWN	0.511221945137157
1.4.1.21	nh3	Bradyrhizobium japonicum	24.7	26	34	8	0.0675997914166779	0.543899670667797	0.431260951773677	3	28	UNKNOWN	0.353868194842407
1.4.1.21	nh3	Pseudomonas aeruginosa	69.8	26	34	8	0.0675997914166779	0.543899670667797	0.431260951773677	3	37	UNKNOWN	0.353868194842407
1.4.1.21	nh3	Rhodopseudomonas palustris	10.3	26	34	8	0.0675997914166779	0.543899670667797	0.431260951773677	3	28	UNKNOWN	0.353868194842407
1.4.1.21	oxaloacetate	Bradyrhizobium japonicum	48	26	34	8	0.0325310634723242	0.763436069504453	0.131842242992371	3	28	UNKNOWN	0.685714285714286
1.4.1.21	oxaloacetate	Pseudomonas aeruginosa	70	26	34	8	0.0325310634723242	0.763436069504453	0.131842242992371	3	37	UNKNOWN	0.685714285714286
1.4.1.21	oxaloacetate	Rhodopseudomonas palustris	14.2	26	34	8	0.0325310634723242	0.763436069504453	0.131842242992371	3	28	UNKNOWN	0.685714285714286
1.4.1.3	2-oxoglutarate	Azospirillum brasilense	183	30	95	65	-0.000679665171676639	NA	1	2	NA	UNKNOWN	1.1070780399274
1.4.1.3	2-oxoglutarate	Pyrococcus horikoshii	165.3	30	95	65	-0.000679665171676639	NA	1	2	90	UNKNOWN	1.1070780399274
1.4.1.3	l-glutamate	Azospirillum brasilense	3.33	30	95	65	0.0240162828665223	NA	1	2	NA	UNKNOWN	0.0274752475247525
1.4.1.3	l-glutamate	Pyrococcus horikoshii	121.2	30	95	65	0.0240162828665223	NA	1	2	90	UNKNOWN	0.0274752475247525
1.4.1.3	nadph	Azospirillum brasilense	200	30	95	65	0.00441910324889767	NA	1	2	NA	UNKNOWN	0.516129032258065
1.4.1.3	nadph	Pyrococcus horikoshii	387.5	30	95	65	0.00441910324889767	NA	1	2	90	UNKNOWN	0.516129032258065
1.4.1.4	2-oxoglutarate	Bacillus licheniformis	0.15	25	90	65	0.0238247433764204	0.244832892497301	0.216888386925531	8	25	UNKNOWN	0.142105263157895
1.4.1.4	2-oxoglutarate	Corynebacterium glutamicum	2500	25	90	65	0.0238247433764204	0.244832892497301	0.216888386925531	8	30	0	0.142105263157895
1.4.1.4	2-oxoglutarate	Kluyveromyces lactis	13.5	25	90	65	0.0238247433764204	0.244832892497301	0.216888386925531	8	30	UNKNOWN	0.142105263157895
1.4.1.4	2-oxoglutarate	Lachancea kluyveri	15	25	90	65	0.0238247433764204	0.244832892497301	0.216888386925531	8	30	UNKNOWN	0.142105263157895
1.4.1.4	2-oxoglutarate	Plasmodium falciparum	39.165	25	90	65	0.0238247433764204	0.244832892497301	0.216888386925531	8	25	UNKNOWN	0.142105263157895
1.4.1.4	2-oxoglutarate	Pyrobaculum calidifontis	95	25	90	65	0.0238247433764204	0.244832892497301	0.216888386925531	8	50	UNKNOWN	0.142105263157895
1.4.1.4	2-oxoglutarate	Saccharomyces cerevisiae	13	25	90	65	0.0238247433764204	0.244832892497301	0.216888386925531	8	30	UNKNOWN	0.142105263157895
1.4.1.4	2-oxoglutarate	Thermococcus waiotapuensis	2530	25	90	65	0.0238247433764204	0.244832892497301	0.216888386925531	8	80	UNKNOWN	0.142105263157895
1.4.1.4	l-glutamate	Bacillus licheniformis	0.06	31	90	59	0.022429478018476	0.373057632879433	0.266632311815011	5	25	UNKNOWN	0.715384615384615
1.4.1.4	l-glutamate	Corynebacterium glutamicum	9.3	31	90	59	0.022429478018476	0.373057632879433	0.266632311815011	5	30	0	0.715384615384615
1.4.1.4	l-glutamate	Plasmodium falciparum	39.3485	31	90	59	0.022429478018476	0.373057632879433	0.266632311815011	5	25	UNKNOWN	0.715384615384615
1.4.1.4	l-glutamate	Pyrobaculum calidifontis	13	31	90	59	0.022429478018476	0.373057632879433	0.266632311815011	5	50	UNKNOWN	0.715384615384615
1.4.1.4	l-glutamate	Thermococcus waiotapuensis	141	31	90	59	0.022429478018476	0.373057632879433	0.266632311815011	5	80	UNKNOWN	0.715384615384615
1.4.1.4	nadp+	Corynebacterium glutamicum	8.1	31	90	59	0.0131849090696255	0.592983530436604	0.16566240649585	4	30	0	0.818181818181818
1.4.1.4	nadp+	Escherichia coli	37.3	31	90	59	0.0131849090696255	0.592983530436604	0.16566240649585	4	NA	0	0.818181818181818
1.4.1.4	nadp+	Pyrobaculum calidifontis	9.9	31	90	59	0.0131849090696255	0.592983530436604	0.16566240649585	4	50	UNKNOWN	0.818181818181818
1.4.1.4	nadp+	Thermococcus waiotapuensis	1209	31	90	59	0.0131849090696255	0.592983530436604	0.16566240649585	4	80	UNKNOWN	0.818181818181818
1.4.1.4	nadph	Bacillus licheniformis	0.18	31	90	59	0.0288520444836111	0.569253231726066	0.185542778378439	4	25	UNKNOWN	23.9130434782609
1.4.1.4	nadph	Corynebacterium glutamicum	2200	31	90	59	0.0288520444836111	0.569253231726066	0.185542778378439	4	30	0	23.9130434782609
1.4.1.4	nadph	Pyrobaculum calidifontis	92	31	90	59	0.0288520444836111	0.569253231726066	0.185542778378439	4	50	UNKNOWN	23.9130434782609
1.4.1.4	nadph	Thermococcus waiotapuensis	14710	31	90	59	0.0288520444836111	0.569253231726066	0.185542778378439	4	80	UNKNOWN	23.9130434782609
1.4.1.4	nh3	Corynebacterium glutamicum	3400	31	90	59	-0.0255379104176014	0.0227201633065966	0.998726853857628	3	30	0	34
1.4.1.4	nh3	Pyrobaculum calidifontis	100	31	90	59	-0.0255379104176014	0.0227201633065966	0.998726853857628	3	50	UNKNOWN	34
1.4.1.4	nh3	Thermococcus waiotapuensis	163	31	90	59	-0.0255379104176014	0.0227201633065966	0.998726853857628	3	80	UNKNOWN	34
1.4.1.8	2-oxoisovalerate	Streptomyces albus	315	27	28	1	0.1442021146422	NA	1	2	NA	UNKNOWN	0.717460317460317
1.4.1.8	2-oxoisovalerate	Streptomyces cinnamonensis	226	27	28	1	0.1442021146422	NA	1	2	NA	UNKNOWN	0.717460317460317
1.4.1.8	l-valine	Streptomyces albus	47.5	27	28	1	0.224907174100577	NA	1	2	NA	UNKNOWN	0.595789473684211
1.4.1.8	l-valine	Streptomyces cinnamonensis	28.3	27	28	1	0.224907174100577	NA	1	2	NA	UNKNOWN	0.595789473684211
1.4.1.9	3,3-dimethyl-2-oxobutanoate	Alcanivorax dieselolei	10.4	28	33	5	0.0877891838752181	0.387980614025328	0.672350047044566	3	NA	UNKNOWN	0.335483870967742
1.4.1.9	3,3-dimethyl-2-oxobutanoate	Bacillus cereus	29.9	28	33	5	0.0877891838752181	0.387980614025328	0.672350047044566	3	25	UNKNOWN	0.335483870967742
1.4.1.9	3,3-dimethyl-2-oxobutanoate	Lysinibacillus sphaericus	31	28	33	5	0.0877891838752181	0.387980614025328	0.672350047044566	3	30	0	0.335483870967742
1.4.1.9	l-ile	Geobacillus stearothermophilus	2	33	54	21	-0.0104189522910351	NA	1	2	NA	0	1.655
1.4.1.9	l-ile	Lysinibacillus sphaericus	3.31	33	54	21	-0.0104189522910351	NA	1	2	25	UNKNOWN	1.655
1.4.1.9	l-leu	Geobacillus stearothermophilus	50	33	54	21	0.0316353117957476	NA	1	2	NA	0	0.2166
1.4.1.9	l-leu	Lysinibacillus sphaericus	10.83	33	54	21	0.0316353117957476	NA	1	2	25	UNKNOWN	0.2166
1.4.1.9	l-norleucine	Geobacillus stearothermophilus	1.3	33	54	21	0.0408890879620729	NA	1	2	NA	0	0.138461538461538
1.4.1.9	l-norleucine	Lysinibacillus sphaericus	0.18	33	54	21	0.0408890879620729	NA	1	2	25	UNKNOWN	0.138461538461538
1.4.1.9	l-norvaline	Geobacillus stearothermophilus	13	33	54	21	0.0442500914994875	NA	1	2	NA	0	0.117692307692308
1.4.1.9	l-norvaline	Lysinibacillus sphaericus	1.53	33	54	21	0.0442500914994875	NA	1	2	25	UNKNOWN	0.117692307692308
1.4.1.9	nadh	Alcanivorax dieselolei	1.1	28	33	5	0.39315874047786	0.06959873112783	0.988095491439187	3	NA	UNKNOWN	0.0114583333333333
1.4.1.9	nadh	Bacillus cereus	4.25	28	33	5	0.39315874047786	0.06959873112783	0.988095491439187	3	25	UNKNOWN	0.0114583333333333
1.4.1.9	nadh	Lysinibacillus sphaericus	96	28	33	5	0.39315874047786	0.06959873112783	0.988095491439187	3	30	0	0.0114583333333333
1.4.3.10	cadaverine	Paenarthrobacter aurescens	1.72	28	30	2	-0.177768080059476	NA	1	2	55	UNKNOWN	2.26744186046512
1.4.3.10	cadaverine	Rhodococcus erythropolis	3.9	28	30	2	-0.177768080059476	NA	1	2	25	0	2.26744186046512
1.4.3.10	putrescine	Paenarthrobacter aurescens	31.8	28	30	2	0.0932283872637577	NA	1	2	55	UNKNOWN	0.650943396226415
1.4.3.10	putrescine	Rhodococcus erythropolis	20.7	28	30	2	0.0932283872637577	NA	1	2	25	0	0.650943396226415
1.4.3.10	spermidine	Paenarthrobacter aurescens	0.29	28	30	2	-0.341865018889642	NA	1	2	55	UNKNOWN	4.82758620689655
1.4.3.10	spermidine	Rhodococcus erythropolis	1.4	28	30	2	-0.341865018889642	NA	1	2	25	0	4.82758620689655
1.4.3.16	l-aspartate	Bacillus subtilis	0.18	28	36	8	-0.0488902010683261	0.852268754618148	0.0528901583398547	3	NA	UNKNOWN	7.39448901290548
1.4.3.16	l-aspartate	Escherichia coli	1.4335	28	36	8	-0.0488902010683261	0.852268754618148	0.0528901583398547	3	NA	UNKNOWN	7.39448901290548
1.4.3.16	l-aspartate	Pseudomonas putida	10.6	28	36	8	-0.0488902010683261	0.852268754618148	0.0528901583398547	3	NA	0	7.39448901290548
1.4.3.19	glycine	Bacillus cereus	0.425	25	30	5	-0.307661902928302	0.283767348074293	0.814130084896493	3	60	0	22.7737226277372
1.4.3.19	glycine	Bacillus subtilis	3	25	30	5	-0.307661902928302	0.283767348074293	0.814130084896493	3	25	0	22.7737226277372
1.4.3.19	glycine	Marinomonas mediterranea	39	25	30	5	-0.307661902928302	0.283767348074293	0.814130084896493	3	30	0	22.7737226277372
1.4.3.2	l-lys	Aspergillus oryzae	0.04	24	25	1	-0.352182518111365	NA	1	2	30	UNKNOWN	2.25
1.4.3.2	l-lys	Rhizoctonia solani	0.09	24	25	1	-0.352182518111365	NA	1	2	30	UNKNOWN	2.25
1.4.3.2	l-met	Aspergillus oryzae	0.039	24	25	1	-0.312025379965446	NA	1	2	30	UNKNOWN	2.05128205128205
1.4.3.2	l-met	Rhizoctonia solani	0.08	24	25	1	-0.312025379965446	NA	1	2	30	UNKNOWN	2.05128205128205
1.4.3.2	l-phe	Aspergillus oryzae	0.039	24	25	1	-0.61305537562943	NA	1	2	30	UNKNOWN	4.1025641025641
1.4.3.2	l-phe	Rhizoctonia solani	0.16	24	25	1	-0.61305537562943	NA	1	2	30	UNKNOWN	4.1025641025641
1.4.3.2	l-phenylalanine	Proteus mirabilis	1.4	25	36	11	0.175331281042212	NA	1	2	NA	0	0.0117857142857143
1.4.3.2	l-phenylalanine	Trichoderma harzianum	0.0165	25	36	11	0.175331281042212	NA	1	2	20	UNKNOWN	0.0117857142857143
1.4.3.21	2-phenylethylamine	Arthrobacter globiformis	1.51	28	36	8	0.10944259322226	0.0972284529966616	0.97685553219162	3	30	UNKNOWN	0.121774193548387
1.4.3.21	2-phenylethylamine	Escherichia coli	12.4	28	36	8	0.10944259322226	0.0972284529966616	0.97685553219162	3	25	0	0.121774193548387
1.4.3.21	2-phenylethylamine	Paenarthrobacter aurescens	3.42	28	36	8	0.10944259322226	0.0972284529966616	0.97685553219162	3	37	UNKNOWN	0.121774193548387
1.4.3.21	benzylamine	Arthrobacter globiformis	0.24	24	28	4	-0.200393411933464	0.685214180674611	0.225207458969793	3	15	UNKNOWN	17.0125
1.4.3.21	benzylamine	Ogataea angusta	4.083	24	28	4	-0.200393411933464	0.685214180674611	0.225207458969793	3	NA	UNKNOWN	17.0125
1.4.3.21	benzylamine	Rhodococcus opacus	12.1	24	28	4	-0.200393411933464	0.685214180674611	0.225207458969793	3	30	UNKNOWN	17.0125
1.4.3.21	ethylamine	Ogataea angusta	20	24	27	3	-0.147899166410904	NA	1	2	37	0	2.77777777777778
1.4.3.21	ethylamine	Rhodococcus opacus	7.2	24	27	3	-0.147899166410904	NA	1	2	30	UNKNOWN	2.77777777777778
1.4.3.21	histamine	Paenarthrobacter aurescens	3.185	27	30	3	-0.20582149817816	NA	1	2	37	UNKNOWN	4.14442700156986
1.4.3.21	histamine	Rhodococcus opacus	13.2	27	30	3	-0.20582149817816	NA	1	2	30	UNKNOWN	4.14442700156986
1.4.3.21	methylamine	Ogataea angusta	2.15	24	27	3	-0.243459489529214	NA	1	2	NA	UNKNOWN	5.375
1.4.3.21	methylamine	Rhodococcus opacus	0.4	24	27	3	-0.243459489529214	NA	1	2	30	UNKNOWN	5.375
1.4.3.21	o2	Arthrobacter globiformis	1.24	24	28	4	-0.150295878442834	NA	1	2	30	UNKNOWN	3.99193548387097
1.4.3.21	o2	Ogataea angusta	4.95	24	28	4	-0.150295878442834	NA	1	2	NA	UNKNOWN	3.99193548387097
1.4.3.21	tyramine	Arthrobacter globiformis	35	27	30	3	-0.296789757941728	0.405586372076449	0.646139560331396	3	15	UNKNOWN	5.8018018018018
1.4.3.21	tyramine	Paenarthrobacter aurescens	2.775	27	30	3	-0.296789757941728	0.405586372076449	0.646139560331396	3	37	UNKNOWN	5.8018018018018
1.4.3.21	tyramine	Rhodococcus opacus	16.1	27	30	3	-0.296789757941728	0.405586372076449	0.646139560331396	3	30	UNKNOWN	5.8018018018018
1.4.3.22	2-phenylethylamine	Arthrobacter globiformis	44	21	28	7	0.110392557920548	0.478153728957838	0.534289108481828	3	30	UNKNOWN	0.254545454545455
1.4.3.22	2-phenylethylamine	Aspergillus niger	137	21	28	7	0.110392557920548	0.478153728957838	0.534289108481828	3	NA	UNKNOWN	0.254545454545455
1.4.3.22	2-phenylethylamine	Komagataella pastoris	11.2	21	28	7	0.110392557920548	0.478153728957838	0.534289108481828	3	30	UNKNOWN	0.254545454545455
1.4.3.22	o2	Arthrobacter globiformis	53	21	28	7	0.0891293320690323	NA	1	2	30	UNKNOWN	0.237735849056604
1.4.3.22	o2	Komagataella pastoris	12.6	21	28	7	0.0891293320690323	NA	1	2	30	UNKNOWN	0.237735849056604
1.4.3.3	d-leu	Rubrobacter xylanophilus	24	25	53	28	-0.00298863383122506	NA	1	2	60	UNKNOWN	1.2125
1.4.3.3	d-leu	Trigonopsis variabilis	29.1	25	53	28	-0.00298863383122506	NA	1	2	30	0	1.2125
1.4.3.3	d-thr	Rubrobacter xylanophilus	7.6	25	53	28	0.0227776979855178	NA	1	2	60	UNKNOWN	0.230263157894737
1.4.3.3	d-thr	Trigonopsis variabilis	1.75	25	53	28	0.0227776979855178	NA	1	2	30	0	0.230263157894737
1.4.3.3	d-tyr	Rubrobacter xylanophilus	53	25	53	28	0.0132890482674795	NA	1	2	60	UNKNOWN	0.424528301886792
1.4.3.3	d-tyr	Trigonopsis variabilis	22.5	25	53	28	0.0132890482674795	NA	1	2	30	0	0.424528301886792
1.4.3.3	d-val	Rubrobacter xylanophilus	31.4	25	53	28	-0.0155006922533682	NA	1	2	60	UNKNOWN	2.71656050955414
1.4.3.3	d-val	Trigonopsis variabilis	85.3	25	53	28	-0.0155006922533682	NA	1	2	30	0	2.71656050955414
1.4.3.5	pyridoxamine 5'-phosphate	Escherichia coli	14.86	28	36	8	0.269897698089923	NA	1	2	NA	UNKNOWN	0.00693135935397039
1.4.3.5	pyridoxamine 5'-phosphate	Saccharomyces cerevisiae	0.103	28	36	8	0.269897698089923	NA	1	2	NA	UNKNOWN	0.00693135935397039
1.4.3.5	pyridoxine 5'-phosphate	Escherichia coli	0.2	28	37	9	-0.152462032264346	0.416756033723298	0.629273923253927	3	37	0	70
1.4.3.5	pyridoxine 5'-phosphate	Mycobacterium tuberculosis	0.01	28	37	9	-0.152462032264346	0.416756033723298	0.629273923253927	3	25	UNKNOWN	70
1.4.3.5	pyridoxine 5'-phosphate	Saccharomyces cerevisiae	0.7	28	37	9	-0.152462032264346	0.416756033723298	0.629273923253927	3	NA	UNKNOWN	70
1.4.9.1	methylamine	Paracoccus denitrificans	24.5	28	30	2	-0.11961142284289	NA	1	2	NA	UNKNOWN	1.73469387755102
1.4.9.1	methylamine	Paracoccus versutus	42.5	28	30	2	-0.11961142284289	NA	1	2	NA	UNKNOWN	1.73469387755102
1.5.1.1	delta1-piperidine-2-carboxylate	Azospirillum brasilense	163.65	9	30	21	0.111819997606093	NA	1	2	30	UNKNOWN	0.00448518179040635
1.5.1.1	delta1-piperidine-2-carboxylate	Colwellia psychrerythraea	0.734	9	30	21	0.111819997606093	NA	1	2	30	UNKNOWN	0.00448518179040635
1.5.1.1	delta1-pyrroline-2-carboxylate	Azospirillum brasilense	569.15	9	30	21	0.0441145611933919	NA	1	2	30	UNKNOWN	0.118466133708161
1.5.1.1	delta1-pyrroline-2-carboxylate	Colwellia psychrerythraea	67.425	9	30	21	0.0441145611933919	NA	1	2	30	UNKNOWN	0.118466133708161
1.5.1.1	l-pipecolate	Azospirillum brasilense	2.5	9	30	21	0.0998528577622884	NA	1	2	30	UNKNOWN	0.008
1.5.1.1	l-pipecolate	Colwellia psychrerythraea	0.02	9	30	21	0.0998528577622884	NA	1	2	30	UNKNOWN	0.008
1.5.1.1	l-proline	Azospirillum brasilense	2.505	9	30	21	0.0314128899706857	NA	1	2	30	UNKNOWN	0.218942115768463
1.5.1.1	l-proline	Colwellia psychrerythraea	0.54845	9	30	21	0.0314128899706857	NA	1	2	30	UNKNOWN	0.218942115768463
1.5.1.20	nadh	Escherichia coli	23.5	24	36	12	-0.0392430785265315	NA	1	2	25	0	2.95744680851064
1.5.1.20	nadh	Leishmania major	69.5	24	36	12	-0.0392430785265315	NA	1	2	NA	UNKNOWN	2.95744680851064
1.5.1.3	7,8-dihydrofolate	Bacillus anthracis	9.3	5	75	70	-0.0379506527213187	0.0110317192133602	0.428849472395224	14	25	0	311.666666666667
1.5.1.3	7,8-dihydrofolate	Enterococcus faecium	116.5	5	75	70	-0.0379506527213187	0.0110317192133602	0.428849472395224	14	NA	UNKNOWN	311.666666666667
1.5.1.3	7,8-dihydrofolate	Escherichia coli	13.15	5	75	70	-0.0379506527213187	0.0110317192133602	0.428849472395224	14	20	UNKNOWN	311.666666666667
1.5.1.3	7,8-dihydrofolate	Haloferax volcanii	3.14	5	75	70	-0.0379506527213187	0.0110317192133602	0.428849472395224	14	NA	0	311.666666666667
1.5.1.3	7,8-dihydrofolate	Lactobacillus casei	3.5	5	75	70	-0.0379506527213187	0.0110317192133602	0.428849472395224	14	NA	UNKNOWN	311.666666666667
1.5.1.3	7,8-dihydrofolate	Leishmania major	29	5	75	70	-0.0379506527213187	0.0110317192133602	0.428849472395224	14	NA	0	311.666666666667
1.5.1.3	7,8-dihydrofolate	Moritella profunda	18.7	5	75	70	-0.0379506527213187	0.0110317192133602	0.428849472395224	14	5	UNKNOWN	311.666666666667
1.5.1.3	7,8-dihydrofolate	Mycobacterium avium	20.5	5	75	70	-0.0379506527213187	0.0110317192133602	0.428849472395224	14	30	0	311.666666666667
1.5.1.3	7,8-dihydrofolate	Mycobacterium tuberculosis	1.95	5	75	70	-0.0379506527213187	0.0110317192133602	0.428849472395224	14	25	UNKNOWN	311.666666666667
1.5.1.3	7,8-dihydrofolate	Plasmodium falciparum	44.62	5	75	70	-0.0379506527213187	0.0110317192133602	0.428849472395224	14	25	0	311.666666666667
1.5.1.3	7,8-dihydrofolate	Saccharomyces cerevisiae	11.5	5	75	70	-0.0379506527213187	0.0110317192133602	0.428849472395224	14	NA	UNKNOWN	311.666666666667
1.5.1.3	7,8-dihydrofolate	Stenotrophomonas maltophilia	123	5	75	70	-0.0379506527213187	0.0110317192133602	0.428849472395224	14	25	UNKNOWN	311.666666666667
1.5.1.3	7,8-dihydrofolate	Thermotoga maritima	0.06	5	75	70	-0.0379506527213187	0.0110317192133602	0.428849472395224	14	20	0	311.666666666667
1.5.1.3	7,8-dihydrofolate	Trypanosoma brucei	4.055	5	75	70	-0.0379506527213187	0.0110317192133602	0.428849472395224	14	37	0	311.666666666667
1.5.1.3	dihydrofolate	Escherichia coli	18.4	4	37	33	-0.0236789607135654	0.0472204662605519	0.779595829834751	5	25	UNKNOWN	2.85714285714286
1.5.1.3	dihydrofolate	Moritella japonica	144	4	37	33	-0.0236789607135654	0.0472204662605519	0.779595829834751	5	25	UNKNOWN	2.85714285714286
1.5.1.3	dihydrofolate	Photobacterium profundum	156	4	37	33	-0.0236789607135654	0.0472204662605519	0.779595829834751	5	25	UNKNOWN	2.85714285714286
1.5.1.3	dihydrofolate	Shewanella violacea	90	4	37	33	-0.0236789607135654	0.0472204662605519	0.779595829834751	5	25	UNKNOWN	2.85714285714286
1.5.1.3	dihydrofolate	Streptococcus pneumoniae	31.5	4	37	33	-0.0236789607135654	0.0472204662605519	0.779595829834751	5	25	0	2.85714285714286
1.5.1.3	nadph	Escherichia coli	10.5	4	54	50	-0.00835799570068657	0.575321770936807	0.0552269122129863	8	20	UNKNOWN	0.398165137614679
1.5.1.3	nadph	Geobacillus stearothermophilus	218	4	54	50	-0.00835799570068657	0.575321770936807	0.0552269122129863	8	60	UNKNOWN	0.398165137614679
1.5.1.3	nadph	Lactobacillus casei	3.67	4	54	50	-0.00835799570068657	0.575321770936807	0.0552269122129863	8	NA	UNKNOWN	0.398165137614679
1.5.1.3	nadph	Moritella japonica	109	4	54	50	-0.00835799570068657	0.575321770936807	0.0552269122129863	8	25	UNKNOWN	0.398165137614679
1.5.1.3	nadph	Mycobacterium avium	26.8	4	54	50	-0.00835799570068657	0.575321770936807	0.0552269122129863	8	30	0	0.398165137614679
1.5.1.3	nadph	Photobacterium profundum	150.5	4	54	50	-0.00835799570068657	0.575321770936807	0.0552269122129863	8	25	UNKNOWN	0.398165137614679
1.5.1.3	nadph	Plasmodium falciparum	60.9	4	54	50	-0.00835799570068657	0.575321770936807	0.0552269122129863	8	25	0	0.398165137614679
1.5.1.3	nadph	Shewanella violacea	86.8	4	54	50	-0.00835799570068657	0.575321770936807	0.0552269122129863	8	25	UNKNOWN	0.398165137614679
1.5.1.30	fmn	Bacillus subtilis	60	26	36	10	-0.15339296368126	0.0380540645820516	0.807841079260219	5	37	UNKNOWN	25
1.5.1.30	fmn	Escherichia coli	1.8	26	36	10	-0.15339296368126	0.0380540645820516	0.807841079260219	5	25	UNKNOWN	25
1.5.1.30	fmn	Rhodobacter sphaeroides	54.38	26	36	10	-0.15339296368126	0.0380540645820516	0.807841079260219	5	NA	UNKNOWN	25
1.5.1.30	fmn	Streptomyces viridifaciens	45	26	36	10	-0.15339296368126	0.0380540645820516	0.807841079260219	5	NA	UNKNOWN	25
1.5.1.30	fmn	Vibrio harveyi	36	26	36	10	-0.15339296368126	0.0380540645820516	0.807841079260219	5	23	UNKNOWN	25
1.5.1.30	nadph	Bacillus subtilis	70	26	30	4	0.000632756528790428	0.990730309306523	0.000212001799546121	3	37	UNKNOWN	0.885714285714286
1.5.1.30	nadph	Streptomyces viridifaciens	62	26	30	4	0.000632756528790428	0.990730309306523	0.000212001799546121	3	NA	UNKNOWN	0.885714285714286
1.5.1.30	nadph	Vibrio harveyi	46.65	26	30	4	0.000632756528790428	0.990730309306523	0.000212001799546121	3	22	0	0.885714285714286
1.5.1.33	dihydrobiopterin	Leishmania major	0.57	24	30	6	0.103298126381399	NA	1	2	25	UNKNOWN	0.24
1.5.1.33	dihydrobiopterin	Trypanosoma brucei	2.375	24	30	6	0.103298126381399	NA	1	2	25	UNKNOWN	0.24
1.5.1.33	quinonoid 6,7-dimethyl-7,8-dihydropterin	Leishmania major	0.44	24	30	6	-0.00166403681776682	NA	1	2	25	UNKNOWN	1.02325581395349
1.5.1.33	quinonoid 6,7-dimethyl-7,8-dihydropterin	Trypanosoma brucei	0.43	24	30	6	-0.00166403681776682	NA	1	2	25	UNKNOWN	1.02325581395349
1.5.1.33	quinonoid dihydrobiopterin	Leishmania major	1.84	24	30	6	-0.0887373438644279	NA	1	2	25	UNKNOWN	3.40740740740741
1.5.1.33	quinonoid dihydrobiopterin	Trypanosoma brucei	0.54	24	30	6	-0.0887373438644279	NA	1	2	25	UNKNOWN	3.40740740740741
1.5.1.36	fad	Acinetobacter baylyi	56	31	36	5	0.0578476941868847	NA	1	2	25	UNKNOWN	0.513761467889908
1.5.1.36	fad	Escherichia coli	109	31	36	5	0.0578476941868847	NA	1	2	37	UNKNOWN	0.513761467889908
1.5.1.36	fmn	Acinetobacter baylyi	7.8	28	31	3	0.220548560437403	NA	1	2	25	UNKNOWN	0.217948717948718
1.5.1.36	fmn	Photobacterium leiognathi	1.7	28	31	3	0.220548560437403	NA	1	2	4	UNKNOWN	0.217948717948718
1.5.1.36	nadh	Acinetobacter baylyi	64	31	36	5	0.0462493047913474	NA	1	2	25	UNKNOWN	0.587155963302752
1.5.1.36	nadh	Escherichia coli	109	31	36	5	0.0462493047913474	NA	1	2	37	UNKNOWN	0.587155963302752
1.5.1.37	fad	Paraburkholderia phenoliruptrix	16.6	28	29	1	-0.160103153671548	0.919487808004243	0.0159091295887007	3	24	UNKNOWN	3.99096385542169
1.5.1.37	fad	Pseudomonas putida	128	28	29	1	-0.160103153671548	0.919487808004243	0.0159091295887007	3	25	UNKNOWN	3.99096385542169
1.5.1.37	fad	Streptomyces globisporus	4.5	28	29	1	-0.160103153671548	0.919487808004243	0.0159091295887007	3	22	UNKNOWN	3.99096385542169
1.5.1.37	fmn	Paraburkholderia phenoliruptrix	18.5	28	29	1	-1.18461470712129	NA	1	2	24	UNKNOWN	15.2972972972973
1.5.1.37	fmn	Pseudomonas putida	283	28	29	1	-1.18461470712129	NA	1	2	25	UNKNOWN	15.2972972972973
1.5.1.37	nadh	Paraburkholderia phenoliruptrix	21	28	29	1	0.830857600899656	NA	1	2	24	UNKNOWN	0.147619047619048
1.5.1.37	nadh	Streptomyces globisporus	3.1	28	29	1	0.830857600899656	NA	1	2	22	UNKNOWN	0.147619047619048
1.5.1.38	nadph	Bacillus cereus	1.5	29	30	1	-1.28480658370088	NA	1	2	37	UNKNOWN	19.2666666666667
1.5.1.38	nadph	Vibrio harveyi	28.9	29	30	1	-1.28480658370088	NA	1	2	22	0	19.2666666666667
1.5.1.40	nadph	Archaeoglobus fulgidus	4.785	36	81	45	-0.0276985773309328	0.548427638292482	0.424223163759549	3	22	0	36.5726227795193
1.5.1.40	nadph	Methanococcus vannielii	175	36	81	45	-0.0276985773309328	0.548427638292482	0.424223163759549	3	20	UNKNOWN	36.5726227795193
1.5.1.40	nadph	Thermobifida fusca	2.75	36	81	45	-0.0276985773309328	0.548427638292482	0.424223163759549	3	25	0	36.5726227795193
1.5.1.5	nadp+	Escherichia coli	17.08	21	36	15	-0.033540316378759	0.6803985123146	0.231558278800678	3	30	0	6.61592505854801
1.5.1.5	nadp+	Leishmania major	10	21	36	15	-0.033540316378759	0.6803985123146	0.231558278800678	3	27	UNKNOWN	6.61592505854801
1.5.1.5	nadp+	Photobacterium phosphoreum	113	21	36	15	-0.033540316378759	0.6803985123146	0.231558278800678	3	NA	UNKNOWN	6.61592505854801
1.5.5.2	l-proline	Escherichia coli	18.5	36	71	35	-0.0142772424667019	0.284120136112642	0.813698755169801	3	21	UNKNOWN	2.34177215189873
1.5.5.2	l-proline	Mycobacterium tuberculosis	33.5	36	71	35	-0.0142772424667019	0.284120136112642	0.813698755169801	3	25	0	2.34177215189873
1.5.5.2	l-proline	Thermus thermophilus	7.9	36	71	35	-0.0142772424667019	0.284120136112642	0.813698755169801	3	25	UNKNOWN	2.34177215189873
1.6.1.1	nadph	Escherichia coli	167.9	34	36	2	-0.0711526124439856	NA	1	2	35	UNKNOWN	1.38773079213818
1.6.1.1	nadph	Pseudomonas aeruginosa	233	34	36	2	-0.0711526124439856	NA	1	2	NA	UNKNOWN	1.38773079213818
1.6.2.4	ferricytochrome c	Bacillus megaterium	53.3	25	30	5	0.0424284838892396	0.734291736813414	0.0706008811256324	4	25	UNKNOWN	0.572232645403377
1.6.2.4	ferricytochrome c	Candida tropicalis	102	25	30	5	0.0424284838892396	0.734291736813414	0.0706008811256324	4	NA	UNKNOWN	0.572232645403377
1.6.2.4	ferricytochrome c	Phanerochaete chrysosporium	30.5	25	30	5	0.0424284838892396	0.734291736813414	0.0706008811256324	4	25	UNKNOWN	0.572232645403377
1.6.2.4	ferricytochrome c	Trypanosoma cruzi	15	25	30	5	0.0424284838892396	0.734291736813414	0.0706008811256324	4	NA	UNKNOWN	0.572232645403377
1.6.3.2	nadh	Thermococcus kodakarensis	68	60	80	20	-0.0520058611603991	NA	1	2	75	UNKNOWN	10.9677419354839
1.6.3.2	nadh	Thermococcus profundus	6.2	60	80	20	-0.0520058611603991	NA	1	2	75	UNKNOWN	10.9677419354839
1.6.3.4	nadh	Lactobacillus pentosus	43.4	33	37	4	0.204984490858493	NA	1	2	37	UNKNOWN	0.151377746773631
1.6.3.4	nadh	Streptococcus pyogenes	286.7	33	37	4	0.204984490858493	NA	1	2	55	0	0.151377746773631
1.6.5.2	1,4-benzoquinone	Archaeoglobus fulgidus	3200	36	81	45	0.0208210723167313	NA	1	2	37	UNKNOWN	0.115625
1.6.5.2	1,4-benzoquinone	Escherichia coli	370	36	81	45	0.0208210723167313	NA	1	2	37	UNKNOWN	0.115625
1.6.5.2	menadione	Giardia intestinalis	28.95	25	35	10	-0.213280595501498	0.12222153817573	0.963592329796253	3	NA	UNKNOWN	169.257340241796
1.6.5.2	menadione	Phanerochaete chrysosporium	4900	25	35	10	-0.213280595501498	0.12222153817573	0.963592329796253	3	NA	UNKNOWN	169.257340241796
1.6.5.2	menadione	Pseudomonas putida	440	25	35	10	-0.213280595501498	0.12222153817573	0.963592329796253	3	60	UNKNOWN	169.257340241796
1.6.5.2	nadh	Archaeoglobus fulgidus	120	25	81	56	-0.00422516096519903	0.836796546294327	0.0165211170067674	5	37	UNKNOWN	6.66666666666667
1.6.5.2	nadh	Escherichia coli	8.9	25	81	56	-0.00422516096519903	0.836796546294327	0.0165211170067674	5	37	UNKNOWN	6.66666666666667
1.6.5.2	nadh	Giardia intestinalis	47.2	25	81	56	-0.00422516096519903	0.836796546294327	0.0165211170067674	5	NA	UNKNOWN	6.66666666666667
1.6.5.2	nadh	Paracoccus denitrificans	258	25	81	56	-0.00422516096519903	0.836796546294327	0.0165211170067674	5	25	0	6.66666666666667
1.6.5.2	nadh	Phanerochaete chrysosporium	800	25	81	56	-0.00422516096519903	0.836796546294327	0.0165211170067674	5	NA	UNKNOWN	6.66666666666667
1.6.5.2	nadph	Archaeoglobus fulgidus	170	25	81	56	2.05199473291211e-05	0.999249447019434	5.63329776636604e-07	4	37	UNKNOWN	4.47058823529412
1.6.5.2	nadph	Escherichia coli	20.1	25	81	56	2.05199473291211e-05	0.999249447019434	5.63329776636604e-07	4	37	UNKNOWN	4.47058823529412
1.6.5.2	nadph	Giardia intestinalis	50.1	25	81	56	2.05199473291211e-05	0.999249447019434	5.63329776636604e-07	4	NA	UNKNOWN	4.47058823529412
1.6.5.2	nadph	Phanerochaete chrysosporium	760	25	81	56	2.05199473291211e-05	0.999249447019434	5.63329776636604e-07	4	NA	UNKNOWN	4.47058823529412
1.6.5.5	9,10-phenanthrenequinone	Escherichia coli	54	28	36	8	0.139032213106151	NA	1	2	25	UNKNOWN	0.0772222222222222
1.6.5.5	9,10-phenanthrenequinone	Saccharomyces cerevisiae	4.17	28	36	8	0.139032213106151	NA	1	2	NA	UNKNOWN	0.0772222222222222
1.7.1.14	no	Fusarium oxysporum	1200	24	29	5	-0.231707248928167	NA	1	2	10	UNKNOWN	14.405762304922
1.7.1.14	no	Histoplasma capsulatum	83.3	24	29	5	-0.231707248928167	NA	1	2	25	UNKNOWN	14.405762304922
1.7.1.3	nadph	Neurospora crassa	1400	24	25	1	0.813689575762638	NA	1	2	NA	0	0.153571428571429
1.7.1.3	nadph	Ogataea angusta	215	24	25	1	0.813689575762638	NA	1	2	NA	UNKNOWN	0.153571428571429
1.7.1.6	2-hydroxy-1,4-naphthoquinone	Escherichia coli	5.8	28	36	8	-0.221798887688792	NA	1	2	NA	UNKNOWN	59.4827586206897
1.7.1.6	2-hydroxy-1,4-naphthoquinone	Rhodobacter sphaeroides	345	28	36	8	-0.221798887688792	NA	1	2	NA	UNKNOWN	59.4827586206897
1.7.1.6	methyl red	Enterococcus faecalis	59.1	30	37	7	-0.0730935971041584	0.532913640200808	0.21816966751046	4	22	0	5.44382352941177
1.7.1.6	methyl red	Enterococcus faecium	17	30	37	7	-0.0730935971041584	0.532913640200808	0.21816966751046	4	NA	UNKNOWN	5.44382352941177
1.7.1.6	methyl red	Pseudomonas aeruginosa	8.2	30	37	7	-0.0730935971041584	0.532913640200808	0.21816966751046	4	NA	UNKNOWN	5.44382352941177
1.7.1.6	methyl red	Shewanella oneidensis	92.545	30	37	7	-0.0730935971041584	0.532913640200808	0.21816966751046	4	40	0	5.44382352941177
1.7.1.6	nadh	Enterococcus faecium	10	34	37	3	-1.04672830578919e-16	NA	NA	2	NA	UNKNOWN	1
1.7.1.6	nadh	Pseudomonas aeruginosa	10	34	37	3	-1.04672830578919e-16	NA	NA	2	NA	0	1
1.7.2.1	ferricytochrome c551	Geobacillus kaustophilus	796	34	55	21	0.12726862217208	NA	1	2	25	UNKNOWN	0.002125
1.7.2.1	ferricytochrome c551	Pseudomonas aeruginosa	1.6915	34	55	21	0.12726862217208	NA	1	2	27	0	0.002125
1.7.2.1	nitrite	Achromobacter xylosoxidans	172	28	34	6	-0.229736339865508	0.0994247905092179	0.533074478971073	6	25	UNKNOWN	15.22625
1.7.2.1	nitrite	Alcaligenes faecalis	392	28	34	6	-0.229736339865508	0.0994247905092179	0.533074478971073	6	25	UNKNOWN	15.22625
1.7.2.1	nitrite	Hyphomicrobium denitrificans	320	28	34	6	-0.229736339865508	0.0994247905092179	0.533074478971073	6	25	UNKNOWN	15.22625
1.7.2.1	nitrite	Paracoccus pantotrophus	23.15	28	34	6	-0.229736339865508	0.0994247905092179	0.533074478971073	6	25	UNKNOWN	15.22625
1.7.2.1	nitrite	Pseudomonas aeruginosa	8	28	34	6	-0.229736339865508	0.0994247905092179	0.533074478971073	6	25	0	15.22625
1.7.2.1	nitrite	Pseudomonas chlororaphis	121.81	28	34	6	-0.229736339865508	0.0994247905092179	0.533074478971073	6	NA	UNKNOWN	15.22625
1.7.2.1	no2-	Magnetospirillum magnetotacticum	80	30	34	4	-0.0649093276264394	0.394635322644468	0.662500552409745	3	NA	UNKNOWN	1.81818181818182
1.7.2.1	no2-	Paracoccus pantotrophus	41	30	34	4	-0.0649093276264394	0.394635322644468	0.662500552409745	3	NA	UNKNOWN	1.81818181818182
1.7.2.1	no2-	Pseudomonas aeruginosa	44	30	34	4	-0.0649093276264394	0.394635322644468	0.662500552409745	3	NA	0	1.81818181818182
1.7.2.2	hydroxylamine	Escherichia coli	3160	36	37	1	-1.16724862270279	NA	1	2	NA	0	14.6976744186047
1.7.2.2	hydroxylamine	Wolinella succinogenes	215	36	37	1	-1.16724862270279	NA	1	2	NA	0	14.6976744186047
1.7.2.2	nitrite	Desulfovibrio desulfuricans	340	30	37	7	0.118514958421354	0.485799864742391	0.17322339269561	5	20	UNKNOWN	1.34201846965699
1.7.2.2	nitrite	Escherichia coli	1025	30	37	7	0.118514958421354	0.485799864742391	0.17322339269561	5	20	UNKNOWN	1.34201846965699
1.7.2.2	nitrite	Shewanella oneidensis	7	30	37	7	0.118514958421354	0.485799864742391	0.17322339269561	5	20	UNKNOWN	1.34201846965699
1.7.2.2	nitrite	Thioalkalivibrio nitratireducens	2027.5	30	37	7	0.118514958421354	0.485799864742391	0.17322339269561	5	20	UNKNOWN	1.34201846965699
1.7.2.2	nitrite	Wolinella succinogenes	758	30	37	7	0.118514958421354	0.485799864742391	0.17322339269561	5	NA	0	1.34201846965699
1.7.2.5	nitric oxide	Desulfovibrio vulgaris	12	30	34	4	-0.130719686320084	NA	1	2	NA	UNKNOWN	3.33333333333333
1.7.2.5	nitric oxide	Paracoccus denitrificans	40	30	34	4	-0.130719686320084	NA	1	2	NA	UNKNOWN	3.33333333333333
1.7.2.5	no	Aspergillus oryzae	166.7	24	58	34	-0.0197739814505749	0.328926559380762	0.23574591299871	6	37	UNKNOWN	7.66666666666667
1.7.2.5	no	Bacillus azotoformans	134	24	58	34	-0.0197739814505749	0.328926559380762	0.23574591299871	6	NA	UNKNOWN	7.66666666666667
1.7.2.5	no	Escherichia coli	14.9	24	58	34	-0.0197739814505749	0.328926559380762	0.23574591299871	6	NA	UNKNOWN	7.66666666666667
1.7.2.5	no	Fusarium oxysporum	368	24	58	34	-0.0197739814505749	0.328926559380762	0.23574591299871	6	NA	0	7.66666666666667
1.7.2.5	no	Moorella thermoacetica	48	24	58	34	-0.0197739814505749	0.328926559380762	0.23574591299871	6	NA	UNKNOWN	7.66666666666667
1.7.2.5	no	Paracoccus denitrificans	33.33	24	58	34	-0.0197739814505749	0.328926559380762	0.23574591299871	6	NA	UNKNOWN	7.66666666666667
1.8.1.12	glutathionylspermidine disulfide	Euglena gracilis	242	24	26	2	-0.226178747645712	NA	1	2	NA	UNKNOWN	2.83372365339578
1.8.1.12	glutathionylspermidine disulfide	Trypanosoma cruzi	85.4	24	26	2	-0.226178747645712	NA	1	2	NA	0	2.83372365339578
1.8.1.12	trypanothione disulfide	Crithidia fasciculata	517	24	30	6	-0.0927827139303555	0.474708022895805	0.134410628375547	6	NA	UNKNOWN	6.04700854700855
1.8.1.12	trypanothione disulfide	Euglena gracilis	283	24	30	6	-0.0927827139303555	0.474708022895805	0.134410628375547	6	NA	UNKNOWN	6.04700854700855
1.8.1.12	trypanothione disulfide	Leishmania donovani	98.59	24	30	6	-0.0927827139303555	0.474708022895805	0.134410628375547	6	25	UNKNOWN	6.04700854700855
1.8.1.12	trypanothione disulfide	Leishmania infantum	18.5	24	30	6	-0.0927827139303555	0.474708022895805	0.134410628375547	6	20	UNKNOWN	6.04700854700855
1.8.1.12	trypanothione disulfide	Trypanosoma brucei	46.8	24	30	6	-0.0927827139303555	0.474708022895805	0.134410628375547	6	NA	UNKNOWN	6.04700854700855
1.8.1.12	trypanothione disulfide	Trypanosoma cruzi	237	24	30	6	-0.0927827139303555	0.474708022895805	0.134410628375547	6	NA	0	6.04700854700855
1.8.1.14	coa-disulfide	Pyrococcus horikoshii	1.305	37	95	58	-0.0183264621178743	NA	1	2	50	UNKNOWN	11.5593869731801
1.8.1.14	coa-disulfide	Staphylococcus aureus	15.085	37	95	58	-0.0183264621178743	NA	1	2	25	UNKNOWN	11.5593869731801
1.8.1.14	nadph	Bacillus anthracis	2	37	95	58	0.010045369646373	NA	1	2	25	0	0.261437908496732
1.8.1.14	nadph	Pyrococcus horikoshii	7.65	37	95	58	0.010045369646373	NA	1	2	75	UNKNOWN	0.261437908496732
1.8.1.4	lipoamide	Plasmodium falciparum	116.25	29	37	8	0.0151137861764778	NA	1	2	25	UNKNOWN	0.756989247311828
1.8.1.4	lipoamide	Streptomyces seoulensis	88	29	37	8	0.0151137861764778	NA	1	2	NA	UNKNOWN	0.756989247311828
1.8.1.7	gssg	Escherichia coli	733.3	24	36	12	0.0303518685648215	NA	1	2	NA	0	0.432292376926224
1.8.1.7	gssg	Euglena gracilis	317	24	36	12	0.0303518685648215	NA	1	2	NA	UNKNOWN	0.432292376926224
1.8.1.7	nadph	Colwellia psychrerythraea	458.5	9	28	19	-0.0219238997783009	0.776933141856077	0.117831944988669	3	4	UNKNOWN	0.672632582703734
1.8.1.7	nadph	Saccharomyces cerevisiae	681.65	9	28	19	-0.0219238997783009	0.776933141856077	0.117831944988669	3	NA	UNKNOWN	0.672632582703734
1.8.1.7	nadph	Xanthomonas campestris	37.5	9	28	19	-0.0219238997783009	0.776933141856077	0.117831944988669	3	NA	UNKNOWN	0.672632582703734
1.8.1.9	5,5'-dithiobis(2-nitrobenzoic acid)	Aeropyrum pernix	9	35	90	55	0.0286187503223222	NA	1	2	NA	UNKNOWN	0.0266666666666667
1.8.1.9	5,5'-dithiobis(2-nitrobenzoic acid)	Entamoeba histolytica	0.24	35	90	55	0.0286187503223222	NA	1	2	30	UNKNOWN	0.0266666666666667
1.8.1.9	nadh	Entamoeba histolytica	0.2	35	37	2	0.305596030434216	NA	1	2	30	UNKNOWN	0.244798041615667
1.8.1.9	nadh	Methanosarcina acetivorans	0.817	35	37	2	0.305596030434216	NA	1	2	NA	UNKNOWN	0.244798041615667
1.8.1.9	nadph	Entamoeba histolytica	0.25	24	37	13	-0.108202025332232	0.296630008477691	0.494729344974093	4	30	UNKNOWN	5.37692307692308
1.8.1.9	nadph	Euglena gracilis	3.495	24	37	13	-0.108202025332232	0.296630008477691	0.494729344974093	4	NA	UNKNOWN	5.37692307692308
1.8.1.9	nadph	Methanosarcina acetivorans	0.65	24	37	13	-0.108202025332232	0.296630008477691	0.494729344974093	4	NA	UNKNOWN	5.37692307692308
1.8.1.9	nadph	Saccharomyces cerevisiae	33.3	24	37	13	-0.108202025332232	0.296630008477691	0.494729344974093	4	NA	UNKNOWN	5.37692307692308
1.8.1.9	thioredoxin	Aeropyrum pernix	63.2	35	90	55	0.0215352685277381	0.507305132072848	0.488526132632207	3	NA	UNKNOWN	0.0138449367088608
1.8.1.9	thioredoxin	Entamoeba histolytica	0.875	35	90	55	0.0215352685277381	0.507305132072848	0.488526132632207	3	30	UNKNOWN	0.0138449367088608
1.8.1.9	thioredoxin	Escherichia coli	22.4	35	90	55	0.0215352685277381	0.507305132072848	0.488526132632207	3	NA	0	0.0138449367088608
1.8.2.2	thiosulfate	Acidiphilium acidophilum	129250	25	37	12	-0.140545717422759	0.457759332600085	0.56615691411731	3	NA	UNKNOWN	18.2119205298013
1.8.2.2	thiosulfate	Allochromatium vinosum	11000	25	37	12	-0.140545717422759	0.457759332600085	0.56615691411731	3	30	0	18.2119205298013
1.8.2.2	thiosulfate	Campylobacter jejuni	604	25	37	12	-0.140545717422759	0.457759332600085	0.56615691411731	3	42	UNKNOWN	18.2119205298013
1.8.3.2	dithiothreitol	Aspergillus oryzae	323400	25	30	5	-0.841230590455652	0.39762329773748	0.658054750980971	3	20	UNKNOWN	7178.69034406215
1.8.3.2	dithiothreitol	Saccharomyces cerevisiae	3.43	25	30	5	-0.841230590455652	0.39762329773748	0.658054750980971	3	NA	UNKNOWN	7178.69034406215
1.8.3.2	dithiothreitol	Trypanosoma brucei	45.05	25	30	5	-0.841230590455652	0.39762329773748	0.658054750980971	3	37	UNKNOWN	7178.69034406215
1.8.3.2	glutathione	Aspergillus niger	66.67	25	26	1	-4.44294773187942	NA	1	2	NA	UNKNOWN	27729.8635068247
1.8.3.2	glutathione	Aspergillus oryzae	1848750	25	26	1	-4.44294773187942	NA	1	2	20	UNKNOWN	27729.8635068247
1.8.3.2	rnase a	Aspergillus niger	0.002	26	30	4	1.00985352979403	NA	1	2	NA	UNKNOWN	9.1324200913242e-05
1.8.3.2	rnase a	Trypanosoma brucei	21.9	26	30	4	1.00985352979403	NA	1	2	25	0	9.1324200913242e-05
1.8.4.11	l-methionine (s)-sulfoxide	Escherichia coli	3.7	26	37	11	0.0900134395389584	0.0456729416089074	0.994861782513192	3	25	UNKNOWN	0.110526315789474
1.8.4.11	l-methionine (s)-sulfoxide	Neisseria meningitidis	3.8	26	37	11	0.0900134395389584	0.0456729416089074	0.994861782513192	3	25	UNKNOWN	0.110526315789474
1.8.4.11	l-methionine (s)-sulfoxide	Trypanosoma cruzi	0.42	26	37	11	0.0900134395389584	0.0456729416089074	0.994861782513192	3	30	UNKNOWN	0.110526315789474
1.8.4.14	l-methionine (r)-s-oxide	Escherichia coli	6.9	36	57	21	-0.0387319155937942	0.229736845317632	0.875328768079141	3	NA	UNKNOWN	4.4980443285528
1.8.4.14	l-methionine (r)-s-oxide	Neisseria meningitidis	14	36	57	21	-0.0387319155937942	0.229736845317632	0.875328768079141	3	25	0	4.4980443285528
1.8.4.14	l-methionine (r)-s-oxide	Thermoplasma acidophilum	1.534	36	57	21	-0.0387319155937942	0.229736845317632	0.875328768079141	3	25	0	4.4980443285528
1.8.4.8	3'-phosphoadenylyl-sulfate	Bacillus subtilis	0.277	30	36	6	0.183598045880971	NA	1	2	NA	UNKNOWN	0.0791428571428572
1.8.4.8	3'-phosphoadenylyl-sulfate	Escherichia coli	3.5	30	36	6	0.183598045880971	NA	1	2	35	UNKNOWN	0.0791428571428572
1.8.5.3	dimethylsulfoxide	Escherichia coli	79.9	28	36	8	0.0296041413817025	0.151887270200683	0.944149576915628	3	30	UNKNOWN	0.581351689612015
1.8.5.3	dimethylsulfoxide	Rhodobacter capsulatus	42.9	28	36	8	0.0296041413817025	0.151887270200683	0.944149576915628	3	NA	0	0.581351689612015
1.8.5.3	dimethylsulfoxide	Rhodobacter sphaeroides	50	28	36	8	0.0296041413817025	0.151887270200683	0.944149576915628	3	NA	0	0.581351689612015
1.8.5.3	methionine sulfoxide	Escherichia coli	61.1	28	36	8	0.00282665208495208	NA	1	2	30	UNKNOWN	0.949263502454992
1.8.5.3	methionine sulfoxide	Rhodobacter sphaeroides	58	28	36	8	0.00282665208495208	NA	1	2	NA	0	0.949263502454992
1.8.5.3	reduced benzyl viologen	Escherichia coli	61	28	36	8	0.0693601142040617	NA	1	2	NA	0	0.278688524590164
1.8.5.3	reduced benzyl viologen	Rhodobacter capsulatus	17	28	36	8	0.0693601142040617	NA	1	2	25	UNKNOWN	0.278688524590164
1.8.5.3	trimethylamine n-oxide	Escherichia coli	1203	28	36	8	-0.0351827760847185	NA	1	2	30	UNKNOWN	1.91188694929343
1.8.5.3	trimethylamine n-oxide	Rhodobacter sphaeroides	2300	28	36	8	-0.0351827760847185	NA	1	2	NA	0	1.91188694929343
1.8.5.4	decylubiquinone	Acidianus ambivalens	0.38	80	83	3	0.0661225512556106	NA	1	2	50	UNKNOWN	0.633333333333333
1.8.5.4	decylubiquinone	Caldivirga maquilingensis	0.6	80	83	3	0.0661225512556106	NA	1	2	60	0	0.633333333333333
1.8.5.4	sulfide	Acidithiobacillus ferrooxidans	6.5	28	83	55	-0.0238805089945464	0.519664789671474	0.469130265679225	3	23	0	10.8333333333333
1.8.5.4	sulfide	Caldivirga maquilingensis	0.6	28	83	55	-0.0238805089945464	0.519664789671474	0.469130265679225	3	60	0	10.8333333333333
1.8.5.4	sulfide	Chlorobaculum tepidum	54	28	83	55	-0.0238805089945464	0.519664789671474	0.469130265679225	3	47	UNKNOWN	10.8333333333333
1.8.5.7	2-(glutathione-s-yl)-hydroquinone	Cupriavidus necator	22	28	36	8	-0.00455370933782145	0.872791231961384	0.0161820706659023	4	23	UNKNOWN	0.928571428571429
1.8.5.7	2-(glutathione-s-yl)-hydroquinone	Escherichia coli	14	28	36	8	-0.00455370933782145	0.872791231961384	0.0161820706659023	4	23	UNKNOWN	0.928571428571429
1.8.5.7	2-(glutathione-s-yl)-hydroquinone	Saccharomyces cerevisiae	13	28	36	8	-0.00455370933782145	0.872791231961384	0.0161820706659023	4	23	UNKNOWN	0.928571428571429
1.8.5.7	2-(glutathione-s-yl)-hydroquinone	Sphingobium chlorophenolicum	11	28	36	8	-0.00455370933782145	0.872791231961384	0.0161820706659023	4	23	UNKNOWN	0.928571428571429
1.8.5.7	2-(glutathione-s-yl)-hydroxy-p-hydroquinone	Cupriavidus necator	4.4	28	36	8	0.0019336196831291	0.973933495849649	0.000679462638620255	4	23	UNKNOWN	0.986111111111111
1.8.5.7	2-(glutathione-s-yl)-hydroxy-p-hydroquinone	Escherichia coli	7.2	28	36	8	0.0019336196831291	0.973933495849649	0.000679462638620255	4	23	UNKNOWN	0.986111111111111
1.8.5.7	2-(glutathione-s-yl)-hydroxy-p-hydroquinone	Saccharomyces cerevisiae	7.1	28	36	8	0.0019336196831291	0.973933495849649	0.000679462638620255	4	23	UNKNOWN	0.986111111111111
1.8.5.7	2-(glutathione-s-yl)-hydroxy-p-hydroquinone	Sphingobium chlorophenolicum	19	28	36	8	0.0019336196831291	0.973933495849649	0.000679462638620255	4	23	UNKNOWN	0.986111111111111
1.8.5.7	2-(glutathione-s-yl)-menadiol	Cupriavidus necator	13	28	36	8	-0.050962372084222	0.302073095665163	0.487101963794408	4	23	UNKNOWN	2.85714285714286
1.8.5.7	2-(glutathione-s-yl)-menadiol	Escherichia coli	4.9	28	36	8	-0.050962372084222	0.302073095665163	0.487101963794408	4	23	UNKNOWN	2.85714285714286
1.8.5.7	2-(glutathione-s-yl)-menadiol	Saccharomyces cerevisiae	14	28	36	8	-0.050962372084222	0.302073095665163	0.487101963794408	4	23	UNKNOWN	2.85714285714286
1.8.5.7	2-(glutathione-s-yl)-menadiol	Sphingobium chlorophenolicum	4.6	28	36	8	-0.050962372084222	0.302073095665163	0.487101963794408	4	23	UNKNOWN	2.85714285714286
1.8.5.7	2-(glutathione-s-yl)-methyl-p-hydroquinone	Cupriavidus necator	31	28	36	8	0.0042124408362193	0.935134410576128	0.0042075446913064	4	23	UNKNOWN	0.56
1.8.5.7	2-(glutathione-s-yl)-methyl-p-hydroquinone	Escherichia coli	15	28	36	8	0.0042124408362193	0.935134410576128	0.0042075446913064	4	23	UNKNOWN	0.56
1.8.5.7	2-(glutathione-s-yl)-methyl-p-hydroquinone	Saccharomyces cerevisiae	8.4	28	36	8	0.0042124408362193	0.935134410576128	0.0042075446913064	4	23	UNKNOWN	0.56
1.8.5.7	2-(glutathione-s-yl)-methyl-p-hydroquinone	Sphingobium chlorophenolicum	14	28	36	8	0.0042124408362193	0.935134410576128	0.0042075446913064	4	23	UNKNOWN	0.56
1.8.5.7	glutathione	Cupriavidus necator	37	28	36	8	0.00889717631062124	0.900469289268275	0.00990636237876227	4	23	UNKNOWN	0.5
1.8.5.7	glutathione	Escherichia coli	15	28	36	8	0.00889717631062124	0.900469289268275	0.00990636237876227	4	23	UNKNOWN	0.5
1.8.5.7	glutathione	Saccharomyces cerevisiae	7.5	28	36	8	0.00889717631062124	0.900469289268275	0.00990636237876227	4	23	UNKNOWN	0.5
1.8.5.7	glutathione	Sphingobium chlorophenolicum	8.04	28	36	8	0.00889717631062124	0.900469289268275	0.00990636237876227	4	30	UNKNOWN	0.5
1.97.1.9	selenate	Enterobacter cloacae	5	26	34	8	-0.236092620085362	NA	1	2	NA	UNKNOWN	77.4
1.97.1.9	selenate	Thauera selenatis	387	26	34	8	-0.236092620085362	NA	1	2	NA	UNKNOWN	77.4
2.1.1.11	magnesium protoporphyrin	Chlorobaculum tepidum	0.14	28	46	18	0.0302260024639042	NA	1	2	NA	UNKNOWN	0.285714285714286
2.1.1.11	magnesium protoporphyrin	Rhodobacter capsulatus	0.04	28	46	18	0.0302260024639042	NA	1	2	NA	UNKNOWN	0.285714285714286
2.1.1.14	5-methyltetrahydropteroyl-gamma-glutamyl-gamma-glutamyl-gamma-glutamylglutamate	Candida albicans	0.417	26	28	2	0.079007597704943	NA	1	2	37	UNKNOWN	0.695
2.1.1.14	5-methyltetrahydropteroyl-gamma-glutamyl-gamma-glutamyl-gamma-glutamylglutamate	Saccharomyces cerevisiae	0.6	26	28	2	0.079007597704943	NA	1	2	37	UNKNOWN	0.695
2.1.1.14	5-methyltetrahydropteroyl-gamma-glutamyl-gamma-glutamylglutamate	Candida albicans	0.445	26	36	10	-0.0637822676016272	0.191765613952683	0.911975040129092	3	37	UNKNOWN	3.70833333333333
2.1.1.14	5-methyltetrahydropteroyl-gamma-glutamyl-gamma-glutamylglutamate	Escherichia coli	0.12	26	36	10	-0.0637822676016272	0.191765613952683	0.911975040129092	3	25	UNKNOWN	3.70833333333333
2.1.1.14	5-methyltetrahydropteroyl-gamma-glutamyl-gamma-glutamylglutamate	Saccharomyces cerevisiae	0.533	26	36	10	-0.0637822676016272	0.191765613952683	0.911975040129092	3	37	UNKNOWN	3.70833333333333
2.1.1.14	5-methyltetrahydropteroyl-gamma-glutamylglutamate	Candida albicans	0.35	26	28	2	-0.0461408044129927	NA	1	2	37	UNKNOWN	1.23674911660777
2.1.1.14	5-methyltetrahydropteroyl-gamma-glutamylglutamate	Saccharomyces cerevisiae	0.283	26	28	2	-0.0461408044129927	NA	1	2	37	UNKNOWN	1.23674911660777
2.1.1.14	l-homocysteine	Candida albicans	0.4335	26	28	2	-0.0592375809671708	NA	1	2	37	UNKNOWN	1.31363636363636
2.1.1.14	l-homocysteine	Saccharomyces cerevisiae	0.33	26	28	2	-0.0592375809671708	NA	1	2	37	UNKNOWN	1.31363636363636
2.1.1.221	guanine9 in trnagly	Saccharomyces cerevisiae	0.0028	25	60	35	-0.00119460822229377	0.252783229203566	0.850448524478161	3	NA	UNKNOWN	1.08
2.1.1.221	guanine9 in trnagly	Schizosaccharomyces pombe	0.0027	25	60	35	-0.00119460822229377	0.252783229203566	0.850448524478161	3	NA	UNKNOWN	1.08
2.1.1.221	guanine9 in trnagly	Thermococcus kodakarensis	0.0025	25	60	35	-0.00119460822229377	0.252783229203566	0.850448524478161	3	40	UNKNOWN	1.08
2.1.1.228	guanine37 in methanocaldococcus jannaschii trnapro	Escherichia coli	0.01	36	80	44	-0.00148867156264619	NA	1	2	37	UNKNOWN	1.16279069767442
2.1.1.228	guanine37 in methanocaldococcus jannaschii trnapro	Methanocaldococcus jannaschii	0.0086	36	80	44	-0.00148867156264619	NA	1	2	52	UNKNOWN	1.16279069767442
2.1.1.228	guanine37 in trnaleu	Escherichia coli	0.093	36	37	1	0.536667029765966	NA	1	2	30	0	0.290625
2.1.1.228	guanine37 in trnaleu	Haemophilus influenzae	0.32	36	37	1	0.536667029765966	NA	1	2	NA	UNKNOWN	0.290625
2.1.1.228	s-adenosyl-l-methionine	Escherichia coli	0.09	34	80	46	-0.0178483861965527	0.0452367276989923	0.994959297705408	3	NA	UNKNOWN	7.109375
2.1.1.228	s-adenosyl-l-methionine	Methanocaldococcus jannaschii	0.016	34	80	46	-0.0178483861965527	0.0452367276989923	0.994959297705408	3	50	0	7.109375
2.1.1.228	s-adenosyl-l-methionine	Pseudomonas aeruginosa	0.11375	34	80	46	-0.0178483861965527	0.0452367276989923	0.994959297705408	3	NA	UNKNOWN	7.109375
2.1.1.41	zymosterol	Candida albicans	0.01	26	30	4	0.0284858380767095	0.14175690906776	0.951231598044379	3	30	UNKNOWN	0.769230769230769
2.1.1.41	zymosterol	Saccharomyces cerevisiae	0.01083	26	30	4	0.0284858380767095	0.14175690906776	0.951231598044379	3	NA	UNKNOWN	0.769230769230769
2.1.1.41	zymosterol	Trypanosoma brucei	0.013	26	30	4	0.0284858380767095	0.14175690906776	0.951231598044379	3	NA	UNKNOWN	0.769230769230769
2.1.1.72	adenine in dna	Escherichia coli	0.0155	34	36	2	0.574469506506035	NA	1	2	37	UNKNOWN	0.0709677419354839
2.1.1.72	adenine in dna	Klebsiella pneumoniae	0.0011	34	36	2	0.574469506506035	NA	1	2	37	UNKNOWN	0.0709677419354839
2.1.1.72	dna adenine	Caulobacter vibrioides	0.33	28	95	67	0.00539900505244136	0.773013406061061	0.012679851984746	9	NA	UNKNOWN	2.67857142857143
2.1.1.72	dna adenine	Enterobacter cloacae	0.0036	28	95	67	0.00539900505244136	0.773013406061061	0.012679851984746	9	NA	UNKNOWN	2.67857142857143
2.1.1.72	dna adenine	Escherichia coli	0.141	28	95	67	0.00539900505244136	0.773013406061061	0.012679851984746	9	NA	UNKNOWN	2.67857142857143
2.1.1.72	dna adenine	Klebsiella pneumoniae	0.00146	28	95	67	0.00539900505244136	0.773013406061061	0.012679851984746	9	NA	UNKNOWN	2.67857142857143
2.1.1.72	dna adenine	Moraxella bovis	0.00146	28	95	67	0.00539900505244136	0.773013406061061	0.012679851984746	9	NA	UNKNOWN	2.67857142857143
2.1.1.72	dna adenine	Pyrococcus horikoshii	0.0042	28	95	67	0.00539900505244136	0.773013406061061	0.012679851984746	9	33	UNKNOWN	2.67857142857143
2.1.1.72	dna adenine	Rhodobacter sphaeroides	0.01125	28	95	67	0.00539900505244136	0.773013406061061	0.012679851984746	9	NA	0	2.67857142857143
2.1.1.72	dna adenine	Streptococcus pneumoniae	0.00146	28	95	67	0.00539900505244136	0.773013406061061	0.012679851984746	9	NA	UNKNOWN	2.67857142857143
2.1.1.72	dna adenine	Thermus aquaticus	0.73	28	95	67	0.00539900505244136	0.773013406061061	0.012679851984746	9	NA	UNKNOWN	2.67857142857143
2.1.1.72	s-adenosyl-l-methionine	Escherichia coli	0.000248	36	95	59	0.0204679374661313	NA	1	2	NA	UNKNOWN	0.062
2.1.1.72	s-adenosyl-l-methionine	Pyrococcus horikoshii	0.004	36	95	59	0.0204679374661313	NA	1	2	33	UNKNOWN	0.062
2.1.1.79	s-adenosyl-l-methionine	Escherichia coli	0.0935	29	37	8	-0.414074365291298	0.0386149528236915	0.996325332144247	3	37	0	1680.67226890756
2.1.1.79	s-adenosyl-l-methionine	Lactobacillus acidophilus	0.0595	29	37	8	-0.414074365291298	0.0386149528236915	0.996325332144247	3	37	UNKNOWN	1680.67226890756
2.1.1.79	s-adenosyl-l-methionine	Oenococcus oeni	100	29	37	8	-0.414074365291298	0.0386149528236915	0.996325332144247	3	35	UNKNOWN	1680.67226890756
2.1.2.1	l-ser	Escherichia coli	5	36	80	44	-0.00343625679427719	NA	1	2	NA	0	1.41643059490085
2.1.2.1	l-ser	Methanocaldococcus jannaschii	3.53	36	80	44	-0.00343625679427719	NA	1	2	37	UNKNOWN	1.41643059490085
2.1.2.1	l-serine	Escherichia coli	12.285	10	70	60	0.00471808326404624	0.793894103313387	0.02643696436945	5	NA	UNKNOWN	0.494652406417112
2.1.2.1	l-serine	Geobacillus stearothermophilus	4.1	10	70	60	0.00471808326404624	0.793894103313387	0.02643696436945	5	NA	UNKNOWN	0.494652406417112
2.1.2.1	l-serine	Hydrogenobacter thermophilus	18.7	10	70	60	0.00471808326404624	0.793894103313387	0.02643696436945	5	70	UNKNOWN	0.494652406417112
2.1.2.1	l-serine	Plasmodium falciparum	0.43	10	70	60	0.00471808326404624	0.793894103313387	0.02643696436945	5	37	UNKNOWN	0.494652406417112
2.1.2.1	l-serine	Psychromonas ingrahamii	9.25	10	70	60	0.00471808326404624	0.793894103313387	0.02643696436945	5	20	UNKNOWN	0.494652406417112
2.1.2.1	tetrahydrofolate	Escherichia coli	5	35	36	1	0.586700235918755	NA	1	2	NA	0	0.259
2.1.2.1	tetrahydrofolate	Trichomonas vaginalis	1.295	35	36	1	0.586700235918755	NA	1	2	NA	0	0.259
2.1.2.5	5-formimidoyltetrahydrofolate	Picrophilus torridus	0.0193	37	57	20	0.030120234032882	0.514940486399326	0.476540155022996	3	30	UNKNOWN	0.488888888888889
2.1.2.5	5-formimidoyltetrahydrofolate	Streptococcus pyogenes	0.0022	37	57	20	0.030120234032882	0.514940486399326	0.476540155022996	3	30	UNKNOWN	0.488888888888889
2.1.2.5	5-formimidoyltetrahydrofolate	Thermoplasma acidophilum	0.0045	37	57	20	0.030120234032882	0.514940486399326	0.476540155022996	3	30	UNKNOWN	0.488888888888889
2.1.2.5	l-glutamate	Picrophilus torridus	0.0193	37	57	20	0.030120234032882	0.514940486399326	0.476540155022996	3	30	UNKNOWN	0.488888888888889
2.1.2.5	l-glutamate	Streptococcus pyogenes	0.0022	37	57	20	0.030120234032882	0.514940486399326	0.476540155022996	3	30	UNKNOWN	0.488888888888889
2.1.2.5	l-glutamate	Thermoplasma acidophilum	0.0045	37	57	20	0.030120234032882	0.514940486399326	0.476540155022996	3	30	UNKNOWN	0.488888888888889
2.1.2.9	e. coli l-methionyl-trnafmet	Haemophilus influenzae	11.3	28	37	9	0.215459454575176	NA	1	2	NA	UNKNOWN	0.0115044247787611
2.1.2.9	e. coli l-methionyl-trnafmet	Saccharomyces cerevisiae	0.13	28	37	9	0.215459454575176	NA	1	2	NA	UNKNOWN	0.0115044247787611
2.1.3.3	carbamoyl phosphate	Escherichia coli	410	35	36	1	0.698970004336027	NA	1	2	20	0	0.2
2.1.3.3	carbamoyl phosphate	Giardia intestinalis	82	35	36	1	0.698970004336027	NA	1	2	37	UNKNOWN	0.2
2.1.3.3	l-citrulline	Enterococcus faecalis	90	35	36	1	1.04575749056069	NA	1	2	NA	UNKNOWN	0.09
2.1.3.3	l-citrulline	Giardia intestinalis	8.1	35	36	1	1.04575749056069	NA	1	2	37	UNKNOWN	0.09
2.1.3.3	l-ornithine	Escherichia coli	440	5	36	31	-0.0167722279779041	0.541840166858494	0.209910432704252	4	20	0	1.40454545454545
2.1.3.3	l-ornithine	Giardia intestinalis	94.2	5	36	31	-0.0167722279779041	0.541840166858494	0.209910432704252	4	37	UNKNOWN	1.40454545454545
2.1.3.3	l-ornithine	Moritella abyssi	618	5	36	31	-0.0167722279779041	0.541840166858494	0.209910432704252	4	5	UNKNOWN	1.40454545454545
2.1.3.3	l-ornithine	Pseudomonas savastanoi	49	5	36	31	-0.0167722279779041	0.541840166858494	0.209910432704252	4	37	UNKNOWN	1.40454545454545
2.1.3.3	ornithine	Enterococcus faecalis	3400	36	96	60	-0.0148831610014603	NA	1	2	NA	UNKNOWN	7.81609195402299
2.1.3.3	ornithine	Pyrococcus furiosus	435	36	96	60	-0.0148831610014603	NA	1	2	30	UNKNOWN	7.81609195402299
2.2.1.1	d-fructose 6-phosphate	Bacillus methanolicus	97	26	45	19	0.0293423193596356	NA	1	2	55	UNKNOWN	0.277010309278351
2.2.1.1	d-fructose 6-phosphate	Scheffersomyces stipitis	26.87	26	45	19	0.0293423193596356	NA	1	2	25	0	0.277010309278351
2.2.1.1	d-ribose 5-phosphate	Bacillus methanolicus	17	28	45	17	-0.0282406780326484	NA	1	2	55	UNKNOWN	3.02058823529412
2.2.1.1	d-ribose 5-phosphate	Saccharomyces cerevisiae	51.35	28	45	17	-0.0282406780326484	NA	1	2	NA	0	3.02058823529412
2.2.1.1	d-xylulose 5-phosphate	Bacillus methanolicus	47	26	45	19	0.0331193276144759	0.506705009227714	0.489468574989456	3	55	UNKNOWN	0.460957446808511
2.2.1.1	d-xylulose 5-phosphate	Saccharomyces cerevisiae	5	26	45	19	0.0331193276144759	0.506705009227714	0.489468574989456	3	25	0	0.460957446808511
2.2.1.1	d-xylulose 5-phosphate	Scheffersomyces stipitis	21.665	26	45	19	0.0331193276144759	0.506705009227714	0.489468574989456	3	25	0	0.460957446808511
2.2.1.2	d-fructose 6-phosphate	Blastobotrys adeninivorans	4.9	24	75	51	0.0130002524369867	0.0277128890309587	0.998106222220071	3	NA	UNKNOWN	0.219730941704036
2.2.1.2	d-fructose 6-phosphate	Thermoplasma acidophilum	13.86	24	75	51	0.0130002524369867	0.0277128890309587	0.998106222220071	3	30	0	0.219730941704036
2.2.1.2	d-fructose 6-phosphate	Thermotoga maritima	22.3	24	75	51	0.0130002524369867	0.0277128890309587	0.998106222220071	3	80	UNKNOWN	0.219730941704036
2.2.1.6	pyruvate	Bacillus licheniformis	514	30	75	45	0.00459749016703115	0.863033829471815	0.00838445922164999	6	37	UNKNOWN	1.23469387755102
2.2.1.6	pyruvate	Bacillus subtilis	121	30	75	45	0.00459749016703115	0.863033829471815	0.00838445922164999	6	37	0	1.23469387755102
2.2.1.6	pyruvate	Enterococcus faecalis	5.29	30	75	45	0.00459749016703115	0.863033829471815	0.00838445922164999	6	37	0	1.23469387755102
2.2.1.6	pyruvate	Escherichia coli	43.85	30	75	45	0.00459749016703115	0.863033829471815	0.00838445922164999	6	37	0	1.23469387755102
2.2.1.6	pyruvate	Mycobacterium tuberculosis	3.196	30	75	45	0.00459749016703115	0.863033829471815	0.00838445922164999	6	NA	UNKNOWN	1.23469387755102
2.2.1.6	pyruvate	Thermotoga maritima	98	30	75	45	0.00459749016703115	0.863033829471815	0.00838445922164999	6	80	UNKNOWN	1.23469387755102
2.2.1.7	d-glyceraldehyde 3-phosphate	Agrobacterium tumefaciens	26.8	20	37	17	-0.0193276980760777	0.613325185673866	0.0696485942192453	6	37	UNKNOWN	0.975609756097561
[truncated: 5,087 more rows]
