# Supplementary material for: Systematic investigation of the link between enzyme catalysis and cold adaptation
Source: eLife. 2022 Jan 12;11:e72884. doi: 10.7554/eLife.72884 (PMC8754429; doi:10.7554/eLife.72884)
Supplement: Figure 4—source data 2. [file elife-72884-fig4-data2.csv]

PROTEIN	TGrowth_max	max_Tm	max_org	TGrowth_min	min_Tm	min_org	fold_change
3-isopropylmalate dehydrogenase	71	87	Thermus thermophilus	30	56	Bacillus subtilis	0.6436781609195402
Adenylate kinase	80	90.5	Methanocaldococcus jannaschii	13	44.6	Bacillus globisporus	0.4928176795580111
Alcohol dehydrogenase	63	92.1	Thermoanaerobacter brockii	37	75.25	Clostridium beijerinckii	0.8170466883821933
Alpha-amylase	96	112	Pyrococcus furiosus	24	39.1	Pseudoalteromonas haloplanktis	0.3491071428571429
Amylosucrase	45	60.45	Deinococcus geothermalis	35	49.6	Neisseria polysaccharea	0.8205128205128205
Apoflavodoxin	37	57.85	Helicobacter pylori	23	55.150000000000006	Nostoc sp	0.9533275713050995
Archaeal histone	96	109.8	Pyrococcus furiosus	37	76.9	Methanobacterium formicicum	0.7003642987249545
Beta lactamase	37	41.6	Staphylococcus aureus	30	51.03	Bacillus cereus	1.2266826923076923
Cel12A	28	66.25	Streptomyces sp	24	58.5	Trichoderma koningii	0.8830188679245283
Che Y	75	100.85	Thermotoga maritima	30	54.85	Bacillus subtilis	0.5438770451165097
Cold shock protein	75	83.25	Thermotoga maritima	30	51	Bacillus subtilis	0.6126126126126126
CutA1 protein	95	144.1	Pyrococcus horikoshii	71	112.7	Thermus thermophilus	0.7820957668285913
Cutinase	50	77.19999999999999	Thermobifida fusca	24	54.3	Fusarium solani	0.7033678756476685
Cytochrome c552	71	95	Thermus thermophilus	70	109.8	Hydrogenobacter thermophilus	1.1557894736842105
Cytochrome P450	71	89.5	Sulfolobus acidocaldarius	27	55	Saccharopolyspora erythraea	0.6145251396648045
D-glyceraldehyde-3-phosphate dehydrogenase	54	82.95	Geobacillus stearothermophilus	36	73.94999999999999	Escherichia coli	0.8915009041591319
Dihydrofolate reductase	55	67.5	Geobacillus kaustophilus	36	49.3	Escherichia coli	0.7303703703703703
Elongation factor EF-Tu	54	50.75	Geobacillus stearothermophilus	36	46.95	Escherichia coli	0.9251231527093596
Endonuclease I	36	54.849999999999994	Vibrio cholerae	15	44.8	Aliivibrio salmonicida	0.8167730173199635
Esterase	81	92	Archaeoglobus fulgidus	57	76.5	Alicyclobacillus acidocaldarius	0.8315217391304348
Flavodoxin	31	60	Desulfovibrio desulfuricans	23	50	Nostoc sp	0.8333333333333334
Frataxin	36	53.8	Escherichia coli	28	43.650000000000006	Saccharomyces cerevisiae	0.8113382899628254
Glutamate dehydrogenase	96	113	Pyrococcus furiosus	75	69.69999999999999	Thermotoga maritima	0.6168141592920353
GrpE	71	105.5	Thermus thermophilus	32	52	Bacillus licheniformis	0.4928909952606635
HPr	36	63.4	Escherichia coli	30	72.6	Bacillus subtilis	1.1451104100946372
HPr protein	54	88.3	Geobacillus stearothermophilus	29	58	Oceanobacillus iheyensis	0.6568516421291053
HU DNA-binding protein	54	64.85	Geobacillus stearothermophilus	30	48.6	Bacillus subtilis	0.7494217424826524
Hydroxymethyltransferase	54	68	Geobacillus stearothermophilus	30	58.5	Bacillus subtilis	0.8602941176470589
Invasion plasmid antigen D	37	76.7	Burkholderia pseudomallei	33	67.28	Yersinia pestis	0.8771838331160365
Isocitrate dehydrogenase	96	103.7	Pyrococcus furiosus	75	98.3	Thermotoga maritima	0.9479267116682738
NADPH:FMN oxidoreductase (YhdA)	30	86.5	Bacillus subtilis	28	60.2	Saccharomyces cerevisiae	0.6959537572254335
Phosphocarrier protein HPr	54	80.55	Geobacillus stearothermophilus	30	71.35	Bacillus subtilis	0.8857852265673495
Phycocyanin	37	74	Synechococcus lividus	21	63	Phormidium luridum	0.8513513513513513
Profilin	35	51.6	Toxoplasma gondii	28	45.9	Saccharomyces cerevisiae	0.8895348837209301
Protein translocase subunit SecA	36	42.5	Escherichia coli	30	44.5	Bacillus subtilis	1.0470588235294118
Pyrophosphatase	71	94.75	Sulfolobus acidocaldarius	30	48	Bacillus subtilis	0.5065963060686016
Ribonuclease H	71	86	Thermus thermophilus	36	52	Escherichia coli	0.6046511627906976
Ribonuclease HI	71	86	Thermus thermophilus	36	46.4	Escherichia coli	0.5395348837209302
Ribosomal protein L30e	87	93.8	Thermococcus celer	28	45.7	Saccharomyces cerevisiae	0.4872068230277186
Serine hydroxymethyltransferase	36	56.620000000000005	Escherichia coli	24	44.05	Aphanothece halophytica	0.7779936418226774
Thioredoxin	57	86.35	Alicyclobacillus acidocaldarius	36	85.3	Escherichia coli	0.9878401852924146
Triose-phosphate isomerase	54	89	Geobacillus stearothermophilus	28	59	Saccharomyces cerevisiae	0.6629213483146067
Xylanase	32	55.7	Bacillus circulans	24	53.5	Pseudoalteromonas haloplanktis	0.9605026929982046
